# Biodiversity in mountain soils above the treeline

Nadine Praeg<sup>1,\*</sup>, Michael Steinwandter<sup>2,\*</sup>, Davnah Urbach<sup>3,4,5,§</sup>, Mark A. Snethlage<sup>3,4,5,§</sup>, Rodrigo P. Alves<sup>6</sup>, Martha E. Apple<sup>7</sup>, Andrea J. Britton<sup>8</sup>, Estelle P. Bruni<sup>9</sup>, Ting-Wen Chen<sup>10,11</sup>, Kenneth Dumack<sup>12</sup>, Fernando Fernandez-Mendoza<sup>6</sup>, Michele Freppaz<sup>13,14,15</sup>, Beat Frey<sup>16</sup>, Nathalie Fromin<sup>17</sup>, Stefan Geisen<sup>18</sup>, Martin Grube<sup>6</sup>, Elia Guariento<sup>2</sup>, Antoine Guisan<sup>19,20</sup>, Qiao-Qiao Ji<sup>21</sup>, Juan J. Jiménez<sup>22</sup>, Stefanie Maier<sup>6</sup>, Lucie A. Malard<sup>19</sup>, Maria A. Minor<sup>23</sup>, Cowan C. Mc Lean<sup>24</sup>, Edward A. D. Mitchell<sup>9</sup>, Thomas Peham<sup>25</sup>, Roberto Pizzolotto<sup>26</sup>, Andy F. S. Taylor<sup>8</sup>, Philippe Vernon<sup>27</sup>, Johan J. van Tol<sup>24</sup>, Yunga Wu<sup>28</sup>, Donghui Wu<sup>21,28</sup>, Zhijing Xie<sup>28</sup>, Bettina Weber<sup>6,§</sup>, Paul Illmer<sup>1,§</sup>, Julia Seeber<sup>2,25,§</sup>

\* *Corresponding authors, contributed equally*

Email: [Nadine.Praeg@uibk.ac.at](mailto:Nadine.Praeg@uibk.ac.at), [Michael.Steinwandter@eurac.edu](mailto:Michael.Steinwandter@eurac.edu)

§ *GMBA support, contributed equally*

§ *Supervisors, contributed equally*

1 Department of Microbiology, Universität Innsbruck, Technikerstrasse 25d, 6020 Innsbruck, Austria

2 Institute for Alpine Environment, Eurac Research, Viale Druso 1, 39100 Bozen/Bolzano, Italy

3 Global Mountain Biodiversity Assessment (GMBA), University of Bern, Hochschulstrasse 6, 3012 Bern, Switzerland

4 Institute of Plant Sciences, University of Bern, Altenbergrain 21, 3013 Bern, Switzerland

5 Centre Interdisciplinaire de Recherche sur la Montagne, University of Lausanne, Ch. de l'Institut 18, 1967 Bramois/Sion, Switzerland

6 Institute of Biology, Division of Plant Sciences, University of Graz, Holteigasse 6, 8010 Graz, Austria

7 Department of Biological Sciences, Montana Technological University, Butte, Montana 59701, United States

8 Ecological Sciences, The James Hutton Institute, Craigiebuckler, Aberdeen, AB15 8QH, Scotland, United Kingdom

9 Laboratory of Soil Biodiversity, University of Neuchâtel, Rue Emile-Argand 11, 2000 Neuchâtel, Switzerland

10 Biology Centre of the Czech Academy of Sciences, Institute of Soil Biology and Biogeochemistry, Na Sádkách 702/7, 37005 České Budějovice, Czech Republic

11 J.F. Blumenbach Institute of Zoology and Anthropology, University of Göttingen, Untere Karspüle 2, 37073 Göttingen, Germany

12 Terrestrial Ecology, Cologne Biocenter, University of Cologne, Zùlpicher Strasse 47b, 50674 Cologne, Germany

13 Department of Agricultural, Forest and Food Sciences, University of Turin, Largo Paolo Braccini 2, 10095 Grugliasco, Italy

14 Research Center on Natural Risks in Mountain and Hilly Environments, University of Turin, Largo Paolo Braccini 2, 10095 Grugliasco, Italy

15 The Alpine Soil Partnership (AlpSP)

16 Forest Soils and Biogeochemistry, Swiss Federal Research Institute WSL, 8903 Birmensdorf, Switzerland

17 CEFE, Univ Montpellier, CNRS, EPHE, IRD, Univ Paul Valéry Montpellier 3, Route de Mende 34199 Montpellier Cedex 5, France

- 38 18 Laboratory of Nematology, Wageningen University and Research, Droevendaalsesteeg 1, 6708PB Wageningen, the  
 39 Netherlands  
 40 19 Department of Ecology and Evolution (DEE), University of Lausanne, Biophore, 1015 Lausanne, Switzerland  
 41 20 Institute of Earth Surface Dynamics (IDYST), University of Lausanne, Géopolis, 1015 Lausanne, Switzerland  
 42 21 Northeast Institute of Geography and Agroecology, Chinese Academy of Sciences, 4888 Shengbei Street, 130102  
 43 Changchun, China  
 44 22 Instituto Pirenaico de Ecología (IPE), Consejo Superior de Investigaciones Científicas (CSIC), Avda. Ntra. Sra. de la  
 45 victoria 16, Jaca 22700 (Huesca), Spain  
 46 23 School of Natural Sciences, Massey University, Riddett Road, Palmerston North 4410, New Zealand  
 47 24 Department of Soil, Crop and Climate Sciences, University of the Free State, 205 Nelson Mandela Drive, 9300  
 48 Bloemfontein, South Africa  
 49 25 Department of Ecology, Universität Innsbruck, Technikerstrasse 25, 6020 Innsbruck, Austria  
 50 26 Dipartimento di Biologia, Ecologia e Scienze della Terra, University of Calabria, Ponte Pietro Bucci, 87036 Rende, Italy  
 51 27 University of Rennes, CNRS, UMR 6553 EcoBio, Biological Station, 35380 Paimpont, France  
 52 28 Key Laboratory of Vegetation Ecology, Ministry of Education, Northeast Normal University, 2555 Jingyue Street, 130117  
 53 Changchun, China  
 54  
 55

|                            |                     |                      |                     |
|----------------------------|---------------------|----------------------|---------------------|
| Nadine Praeg               | 0000-0002-1531-8543 | Michael Steinwandter | 0000-0001-8545-6047 |
| Davnah Urbach              | 0000-0001-9170-7834 | Mark A. Snethlage    | 0000-0002-1398-8869 |
| Rodrigo P. Alves           | 0000-0003-1009-5923 | Martha E. Apple      | 0000-0002-2821-6546 |
| Andrea J. Britton          | 0000-0002-0603-7432 | Estelle P. Bruni     | 0000-0002-0800-0254 |
| Ting-Wen Chen              | 0000-0001-9449-3034 | Kenneth Dumack       | 0000-0001-8798-0483 |
| Fernando Fernandez-Mendoza | 0000-0002-0328-0808 | Michele Freppaz      | 0000-0002-4290-6850 |
| Beat Frey                  | 0000-0002-6391-3574 | Nathalie Fromin      | 0000-0003-3752-7503 |
| Stefan Geisen              | 0000-0003-0734-727X | Martin Grube         | 0000-0001-6940-5282 |
| Elia Guariento             | 0000-0003-1060-9816 | Antoine Guisan       | 0000-0002-3998-4815 |
| Qiao-Qiao Ji               | 0000-0003-0313-2669 | Juan J. Jiménez      | 0000-0003-2398-0796 |
| Stefanie Maier             | 0000-0003-1105-9748 | Lucie A. Malard      | 0000-0001-9988-2127 |
| Maria A. Minor             | 0000-0003-2095-5456 | Cowan Mc. Lean       | 0000-0001-9162-721X |
| Edward A. D. Mitchell      | 0000-0003-0358-506X | Thomas Peham         | 0000-0002-8475-0540 |
| Roberto Pizzolotto         | 0000-0002-4587-3476 | Andy Taylor          | 0000-0003-0727-8171 |
| Philippe Vernon            | 0000-0002-6237-7511 | Johan J. van Tol     | 0000-0002-0222-8119 |
| Yunga Wu                   | 0000-0002-2771-9934 | Donghui Wu           | 0000-0001-8778-0107 |
| Zhijing Xie                | 0000-0003-2872-4767 | Bettina Weber        | 0000-0002-5453-3967 |
| Paul Illmer                | 0000-0003-3368-3015 | Julia Seeber         | 0000-0003-0189-7377 |

56

|    |                                                           |    |
|----|-----------------------------------------------------------|----|
| 57 | <b>CONTENTS</b>                                           |    |
| 58 |                                                           |    |
| 59 | GLOSSARY                                                  | 5  |
| 60 | I. INTRODUCTION                                           | 7  |
| 61 | II. METHODS                                               | 10 |
| 62 | III. CHARACTERISTICS OF MOUNTAIN ZONES ABOVE THE TREELINE | 10 |
| 63 | (1) Soil                                                  | 10 |
| 64 | (2) Vegetation                                            | 12 |
| 65 | IV. CRYPTOGAMS AND BIOLOGICAL SOIL CRUSTS                 | 13 |
| 66 | (1) Cryptogams                                            | 15 |
| 67 | (2) Biocrusts                                             | 19 |
| 68 | V. SOIL MICROBIOTA                                        | 22 |
| 69 | (1) Bacteria and Archaea (Prokaryotes)                    | 23 |
| 70 | (2) Fungi                                                 | 26 |
| 71 | (3) Protists                                              | 29 |
| 72 | VI. SOIL INVERTEBRATES                                    | 33 |
| 73 | (1) Macro-invertebrates                                   | 36 |
| 74 | (2) Meso-invertebrates                                    | 38 |
| 75 | (3) Micro-invertebrates                                   | 39 |
| 76 | (4) Adaptation strategies of fauna to mountain soils      | 39 |
| 77 | VII. KNOWLEDGE GAPS AND RESEARCH OPPORTUNITIES            | 41 |
| 78 | VIII. CONCLUSIONS                                         | 45 |
| 79 | IX. ACKNOWLEDGEMENTS                                      | 46 |
| 80 | X. REFERENCES                                             | 47 |
| 81 | XI. SUPPORTING INFORMATION                                | 85 |
| 82 |                                                           |    |
| 83 |                                                           |    |

84 **ABSTRACT**

85 Despite the importance of healthy soils for human livelihood, wellbeing, and safety, current gaps in our  
86 knowledge and understanding of biodiversity in soil are numerous, undermining conservation efforts. These  
87 gaps are particularly wide in mountain regions where healthy soils are especially important for human  
88 safety and yet evidence is accumulating of ongoing degradation, posing significant threats to ecosystem  
89 functioning and human settlements.

90 To analyse these gaps in detail, we synthesise current research on the global diversity of microorganisms,  
91 cryptogams, and invertebrates in mountain soils above the treeline. This synthesis is based on a semi-  
92 quantitative survey of the literature and an expert-based analysis. Our work reveals not only deficiencies in  
93 geographic cover but also significant gaps in taxonomic coverage, particularly among soil protists and  
94 invertebrates, and a lack of (functional and ecological) description of the uncultivated majority of  
95 prokaryotes, fungi, and protists. We subsequently build on this overview to highlight opportunities for  
96 research on mountain soils as systems of co-occurring species that interact in complex environmental  
97 matrices to fulfil critical functions and make essential contributions to life on land.

98 Closing gaps in biodiversity research in mountain soil is crucial to enhance our understanding and to  
99 promote laws and guidelines advancing international soil biodiversity conservation targets in mountains.  
100 Addressing sparse and biased data, recognizing the impact of environmental changes on mountain  
101 ecosystems, and advocating dedicated policies are essential strategies to safeguard mountain soils and their  
102 biodiversity.

103

104

105 *Keywords:* alpine soils, bacteria, biogeography, bryophytes, cryptogams, fungi, lichens, microbial diversity,  
106 protists, soil fauna

107

108 **GLOSSARY**

109

| Term                   | Chapter         | Definition                                                                                                                                                                                                                               |
|------------------------|-----------------|------------------------------------------------------------------------------------------------------------------------------------------------------------------------------------------------------------------------------------------|
| acidophile             | General         | Organisms which favour low pH conditions; especially regarding growth and reproduction                                                                                                                                                   |
| aeolian food source    | General         | Any kind of organic material that is transported by wind and that can serve as a nutrient source                                                                                                                                         |
| alkaliphile            | General         | Organisms which favour high pH conditions; especially regarding growth and reproduction                                                                                                                                                  |
| autotrophic            | General         | Ability to produce biomass solely by using inorganic substances; often refers to C-autotrophy when using inorganic C compounds, such as CO <sub>2</sub> , for synthesis of biomass-C                                                     |
| brachyptery            | Soil fauna      | Describes an anatomical condition where winged animals (mostly insects) have very short and/or non-functional wings. This can be sex-specific (e.g. often found in females) or be related to environmental conditions (e.g. cold, windy) |
| bryophytes             | Cryptogams      | Non-vascular plants that include mosses, hornworts, and liverworts                                                                                                                                                                       |
| cetrarioid lichen      | Cryptogams      | Monophyletic group of lichens that either belong to or are closely related to the genus <i>Cetraria</i>                                                                                                                                  |
| chasmolithic           | Cryptogams      | Growing in rock cracks                                                                                                                                                                                                                   |
| chionophilous          | Cryptogams      | Organisms which prefer or need a permanent snow cover                                                                                                                                                                                    |
| chionophobic           | Cryptogams      | Organisms which avoid snow-covered habitats                                                                                                                                                                                              |
| cryophilous            | Cryptogams      | Organisms which prefer very low temperatures                                                                                                                                                                                             |
| ecotone                | General         | Transition between ecological communities, ecosystems, and/or ecological regions along an environmental gradient                                                                                                                         |
| endemic                | General         | Native and restricted to a certain place                                                                                                                                                                                                 |
| endophyte              | Soil microbiota | Organisms, mostly fungi or bacteria, living within a plant without causing a disease                                                                                                                                                     |
| epiphyte               | General         | Growing on plants                                                                                                                                                                                                                        |
| eukaryotes, eukaryotic | General         | Organisms with cell nucleus; protists, animals, fungi, plants                                                                                                                                                                            |
| eurihydric             | Cryptogams      | Ability to withstand a wide range of humidity                                                                                                                                                                                            |
| fruticose              | Cryptogams      | Fruticose lichens have a three-dimensional, shrub-like or bushy growth pattern                                                                                                                                                           |
| halophile              | General         | Organisms which favour high salt concentrations; especially regarding growth and reproduction                                                                                                                                            |
| liverwort              | Cryptogams      | A non-vascular bryophyte that belongs to the division Marchantiophyta                                                                                                                                                                    |

|                         |                 |                                                                                                                                                          |
|-------------------------|-----------------|----------------------------------------------------------------------------------------------------------------------------------------------------------|
| neutrophile             | General         | Organisms which favour neutral pH conditions; especially regarding growth and reproduction                                                               |
| nitrogen fixation       | Soil microbiota | The biotic energy consuming process by which inorganic N <sub>2</sub> is converted to NH <sub>3</sub> ; only performed by bacteria and archaea           |
| nunatak                 | General         | Mountain summits and ridges that remained ice-free during the last Ice Age and served as refuges for alpine and high alpine fauna, flora, and microbiota |
| petrophile              | Soil fauna      | Organisms which favour rocky environments                                                                                                                |
| phanerogam              | Cryptogams      | Plants that produce seeds. Also termed as spermatophytes                                                                                                 |
| pleurocarpous moss      | Cryptogams      | Mosses in which the sporophyte is borne on short lateral branches and not culminating the growth of the main axes (i.e. acrocarpous moss)                |
| poikilohydric           | Cryptogams      | Organism whose water status is passively controlled by the environment                                                                                   |
| prokaryote, prokaryotic | Soil microbiota | Organisms without cell nucleus; archaea and bacteria                                                                                                     |
| protist                 | Soil microbiota | All eukaryotes that are not plants, metazoans, or fungi                                                                                                  |
| psychrophile            | General         | Organisms which favour low temperature conditions; especially regarding growth and reproduction                                                          |
| rhizosphere             | Soil microbiota | Narrow space/region in the soil directly influenced by plant roots                                                                                       |
| saprotrophic            | General         | An organism that feeds on dead organic matter                                                                                                            |
| saxicolous              | Cryptogams      | Growing on rock                                                                                                                                          |
| soil microbiota         | Soil microbiota | Prokaryotes, fungi, and protists living in soil                                                                                                          |
| terricolous             | Cryptogams      | Growing on soil                                                                                                                                          |
| thermophile             | General         | Organisms which favour high temperature conditions; especially regarding growth and reproduction                                                         |

---

---

## 111 I. INTRODUCTION

112 In recent years, our awareness of the importance of soils and their biodiversity has steadily increased,  
113 pressed by the growing evidence of rapid soil degradation worldwide and across all biomes (European  
114 Environment Agency, 2019; FAO *et al.*, 2020; Anthony, Bender & van der Heijden, 2023). Because of  
115 their environmental, societal, and economic consequences, soil degradation and the loss of soil biodiversity  
116 pose a major threat to humankind. The need to protect soils has become an international priority (IPBES,  
117 2018), reflected in both the Agenda for Sustainable Development of the United Nations and the recently  
118 adopted Kunming-Montreal Global Biodiversity Framework (United Nations, 2015; UN Convention on  
119 Biological Diversity, 2022). The demand for data, knowledge, and global responses to the challenge of how  
120 to safeguard soils and their biota has led to an increasing number of international initiatives, including the  
121 Soil Biodiversity Observation Network (SoilBON), the Global Soil Biodiversity Initiative (GSBI), the  
122 International Network on Soil Biodiversity (NETSOB), and the Global Soil Laboratory Network  
123 (GLOSOLAN). All these initiatives aim at providing the biological and ecosystem information needed to  
124 implement sustainable management and conservation of soils.

125 Despite these recent developments, major gaps and blind spots still exist in soil research and in available  
126 data and knowledge on soil biodiversity. This is particularly the case with mountains (Baruck *et al.*, 2016;  
127 Guerra *et al.*, 2020), even though mountain soils are critical for many ecosystem processes, functions, and  
128 services, and their maintenance and stability are particularly important in terms of hazards and natural risk  
129 management (FAO, 2015; Stanchi *et al.*, 2023). Given that mountain soils can take thousands of years to  
130 develop (up to 1000 years for 2–3 cm in (high) alpine areas (Stanchi *et al.*, 2023), their degradation and  
131 gradual erosion as a result of overexploitation and poor management may ultimately lead to a loss of  
132 biodiversity and associated ecosystem collapse, with no option for recovery (Körner, 2021; Singh *et al.*,  
133 2023). It emphasises the complexity of ecological restoration, pointing out that while repairing functions  
134 and maintaining existing taxa is feasible to some extent, the irreversible loss of certain locally adapted  
135 species, especially in isolated environments like nunataks, is a significant concern. These threats are further  
136 exacerbated by climate and land-use change, as well as the increasing occurrence of invasive non-native  
137 species (Palomo, 2017; Zucconi & Buzzini, 2021; Iseli *et al.*, 2023). Here, we first provide a synthetic  
138 overview of the current state of knowledge on biodiversity in mountain soils above the treeline. We  
139 subsequently build on this overview to highlight opportunities for research on mountain soils as systems of  
140 co-occurring species that interact in complex environmental matrices to fulfil critical functions and make  
141 essential contributions to life on land. We restrict this review to alpine soils above the treeline in mountain  
142 regions (Fig. 1, Table 1). The term ‘alpine’ in this context specifically refers to soils located in mountainous  
143 areas above the treeline. The synthesis was performed as a collaborative effort by members of the Global  
144 Mountain Biodiversity Assessment (GMBA) ‘Mountain Soil Biodiversity’ working group, who

145 summarised current literature in their respective fields of expertise. This body of literature was further  
 146 consolidated based on a semi-comprehensive review of available publications.  
 147

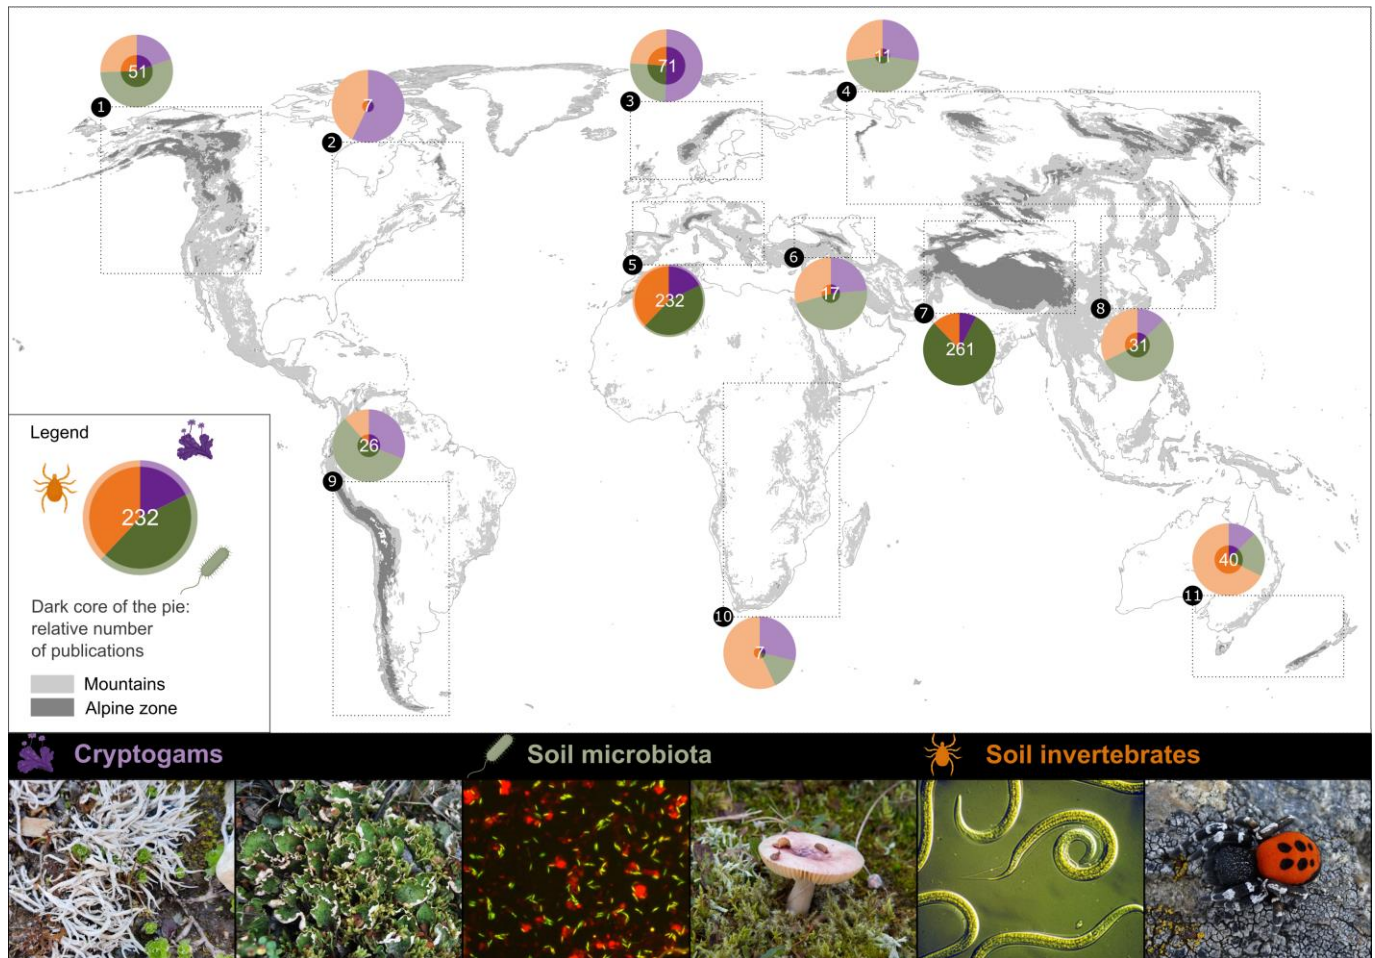

148  
 149 **Fig. 1.** Global map of the number of scientific papers on biodiversity in mountain soils above the treeline  
 150 (cryptogams, soil microbiota, and soil invertebrates) by alpine region. The dark core of the pies represents  
 151 the number of publications in the respective area compared to the number of the region with the most  
 152 publications (i.e. Central Asia). The alpine regions were named here as (1) North American Cordillera, (2)  
 153 Appalachians & Northeast Ranges, (3) Northern Europe, (4) North Asia, (5) Central & Southern Europe,  
 154 (6) Caucasus, (7) Central Asia, (8) East Asia, (9) Andes & South America, (10) Afro-alpine Region, and  
 155 (11) Australia & New Zealand. See Fig. S1 for an alternative version showing the density of papers per km<sup>2</sup>  
 156 of alpine area. Photos from left to right: Cryptogams: Arctic-alpine lichen *Thamnolia vermicularis*, arctic-  
 157 alpine lichen *Peltigera aphthosa* (credit: Bettina Weber); Soil microbiota: DNA stained microscope  
 158 preparation of soil bacteria (credit: Nadine Praeg & Paul Illmer), *Russula* sp. (credit: Andrea J. Britton);  
 159 Soil invertebrates: Nematodes and a male velvet spider *Eresus sandaliatus* (credits: CSIRO Entomology  
 160 and Michael Steinwandter, respectively).

161

162



163

164 **Table 1.** List of the alpine mountain regions included in this review, presenting their respective area, and  
 165 the corresponding number of papers per main soil organism group. The identification (ID) numbers of the  
 166 alpine mountain regions align with those referenced in the Figs. 1 & 3–5. The designation of the regions  
 167 identified as ‘alpine region’ along with a summary of the corresponding mountain ranges is detailed in  
 168 Table S3. For visual comparison of the areas (tree map) of the alpine mountain regions, please refer to Fig.  
 169 S2 in Appendix S1.

| Nr. | Alpine region                   | Area [km <sup>2</sup> ] | Number of scientific articles |            |               |                   |
|-----|---------------------------------|-------------------------|-------------------------------|------------|---------------|-------------------|
|     |                                 |                         | Cryptogams                    | Microbes   | Invertebrates | <i>Total</i>      |
| 1   | North American Cordillera       | 306,815                 | 10                            | 28         | 13            | <i>51</i>         |
| 2   | Appalachians & Northeast Ranges | 10,929                  | 4                             | 0          | 3             | <i>7</i>          |
| 3   | Northern Europe                 | 47,623                  | 36                            | 18         | 17            | <i>71</i>         |
| 4   | North Asia                      | 395,738                 | 3                             | 5          | 3             | <i>11</i>         |
| 5   | Central & Southern Europe       | 26,606                  | 41                            | 103        | 88            | <i>232</i>        |
| 6   | Caucasus                        | 16,567                  | 4                             | 8          | 5             | <i>17</i>         |
| 7   | Central Asia                    | 2,188,571               | 20                            | 209        | 32            | <i>261</i>        |
| 8   | East Asia                       | 2,778                   | 4                             | 17         | 10            | <i>31</i>         |
| 9   | Andes & South America           | 547,091                 | 8                             | 15         | 3             | <i>26</i>         |
| 10  | Afro-alpine Region              | 497                     | 2                             | 1          | 4             | <i>7</i>          |
| 11  | Australia & New Zealand         | 12,639                  | 5                             | 8          | 27            | <i>40</i>         |
|     | <b>Sums</b>                     | <b>3,555,854</b>        | <b>137</b>                    | <b>412</b> | <b>205</b>    | <b><i>754</i></b> |

170

171

## 172 **II. METHODS**

173 The synthesis was performed by querying ‘Web of Science’ for scientific papers on biodiversity in  
174 mountain soils in the alpine zones of the world (i.e. above the treeline in temperate and continental climatic  
175 zones, excluding tropical areas) and attributing each paper to one or more of the organismic groups  
176 considered here, making a distinction between primary and secondary focus as many publications covered  
177 more than one organismic group (Figs. 3–5) (see detailed methods in Appendix S1). Each paper was also  
178 attributed to one of the 11 defined alpine regions (see Table 1 and Table S3) according to the mountain  
179 ranges or systems that were specified in the title, abstract, keywords, or methods. The lists were  
180 subsequently reviewed and validated and supplemented with references from the authors personal reference  
181 databases. See Appendix S1 for a detailed description of the literature search and data processing.

## 183 **III. CHARACTERISTICS OF MOUNTAIN ZONES ABOVE THE TREELINE**

### 184 **(1) Soil**

185 Major soil types occurring in the alpine and nival zones of temperate and continental mountains include  
186 (according to the soil taxonomy, Soil Survey Staff, 2022) Entisols, Inceptisols, Mollisols, Histosols,  
187 permafrost-affected soils, and Podzols, the latter mainly found on siliceous rocks, slopes with conifers, and  
188 alpine dwarf-shrub zones (Gelisols) (Price & Harden, 2013). Soil formation in mountain areas is – besides  
189 climatic factors – typically controlled by microrelief and morphodynamics, gravitational and fluvial  
190 dynamics, solifluction, and wind-related processes (Egli, Dahms & Norton, 2014). Accordingly, soil types  
191 and properties show small-scale heterogeneity (Egli & Poulénard, 2016) resulting from the high variability  
192 in (micro-) climate, topography, orientation, slope, and regional/local wind systems (Burga, Klötzli &  
193 Grabherr, 2004; Hoorn, Perrigo & Antonelli, 2018). Properties that are specific to alpine soils include an  
194 incomplete development (Donhauser & Frey, 2018), with slow humus accumulation and limited nutrient  
195 supply, even though accumulation of wind-blown fine material may, on a small scale, improve the physical  
196 and chemical characteristics of stony substrates (Gild, Geitner & Sanders, 2018). Detailed information on  
197 mountain soil types and characteristics is an important prerequisite to understanding biodiversity in soil and  
198 the unique adaptations of soil (micro-)organisms to overall hostile environmental conditions (Fig. 2)  
199 (Pellissier *et al.*, 2014; Orgiazzi *et al.*, 2016; Yashiro *et al.*, 2016; Mod *et al.*, 2020; Seppey *et al.*, 2020).  
200 However, this information remains rare (Baruck *et al.*, 2016; Guisan *et al.*, 2019) and needs to be  
201 implemented through specific and targeted initiatives (e.g. the establishment of the Alpine Soil Partnership  
202 in 2017).

203 Generally, life in mountain soils is determined by their abiotic properties, including water content and  
204 temperature as the main drivers of chemical and physical weathering, parent material, including chemical  
205 composition, physical properties, resistance against weathering, and the predetermination of soil pH as well  
206 as organic matter quality and quantity (Fig. 2) (Paul & Clark, 1996). Both the length of the growing season

207 and the mean temperature in mountain soils typically decrease with increasing elevation. In eastern  
208 Scotland, for example, Britton *et al.* (2011) measured a decrease in mean summer soil temperature at 10 cm  
209 depth from 9.5 °C at the treeline at 640 m a.s.l. to 7.2 °C at 908 m and a decline in the length of the growing  
210 season from 198 to 156 days based on a threshold of 5 °C. The low temperatures typical of mountain soils  
211 at high elevations favour the accumulation of organic matter through reduced decomposition rates, which  
212 can result in large amounts of soil carbon (Praeg *et al.*, 2020). Accordingly, mountain regions have received  
213 increasing attention for their contribution to terrestrial C storage (Hagedorn, Gavazov & Alexander, 2019;  
214 Stanchi *et al.*, 2021). While nival (and alpine) soils exhibit minimal C stocks (Frey *et al.*, 2016; Adamczyk  
215 *et al.*, 2019; Luláková *et al.*, 2019), soils at lower elevations, where temperatures and plant coverage are  
216 higher, may act as larger C sinks.

217 An additional factor affecting life in mountain soils is the presence of a substantial and long-lasting snow  
218 cover. Together, seasonal snowpack depth, duration, and melt-out control the onset and duration of the  
219 growing season, mitigate low soil temperatures, and affect microbial activity, soil nutrient cycling, soil gas  
220 fluxes, and pedogenesis (Freppaz *et al.*, 2017). These factors further determine community composition,  
221 and their high spatial variability may enable the close co-occurrence of species adapted to differing  
222 environmental conditions such as chionophilous and chionophobic taxa (Odland & Munkejord, 2008;  
223 Carlson *et al.*, 2015; Niittynen & Luoto, 2018; Seeber *et al.*, 2021; Panchard *et al.*, 2023). In addition to  
224 the presence of substantial (and natural) snow cover, further drivers of change in abiotic soil properties  
225 include winter sports operations. These activities, such as the establishment and maintenance of (large) ski  
226 areas, including levelling and grading operations, represent strong mechanical disturbance. This promotes  
227 the breakdown of soil aggregates, causes the exposure of organic matter that was previously protected in  
228 undisturbed soils (Gros *et al.*, 2004), and fosters soil erosion, which all together lowers the organic C  
229 content (Delgado *et al.*, 2007; Negro *et al.*, 2013) and reduces the soil micropore porosity, with  
230 consequences for soil aeration and water holding capacity (Pohl *et al.*, 2009). Additionally, artificial  
231 snowmaking uses nucleating agents and water, often diverted from lakes and streams, which contain  
232 mineral and organic compounds that are not present in natural snow. This provides an additional input of  
233 solutes during snow melting (Wipf *et al.*, 2005; Roux-Fouillet, Wipf & Rixen, 2011), resulting in higher  
234 soil pH and electrical conductivity (Delgado *et al.*, 2007; Freppaz *et al.*, 2013; Casagrande Bacchiocchi *et*  
235 *al.*, 2019).

236 Considering the impact of global change, mountain soils are likely to undergo major transitions. Nival  
237 soils, as stated above, can be expected to increasingly serve as C sinks with climate warming. They are  
238 equally expected to become N sinks due to increased plant productivity under warmer conditions  
239 (Steinbauer *et al.*, 2018). This holds especially true for barren or sparsely vegetated soils with low C and N  
240 content, where increased plant growth and primary production clearly outweigh temperature-driven  
241 increases in soil respiration (Hagedorn *et al.*, 2019). In contrast, distinct increases in C loss have also been

242 reported as a consequence of increased temperatures allowing lowland plants to colonise alpine  
243 environments (Walker *et al.*, 2022). Thus, predictions about the amount and the dynamics of C and N  
244 cycling in response to global warming can only be made on a basis of a better understanding of the complex  
245 biotic and abiotic interactions in mountain soils (Fig. 2).

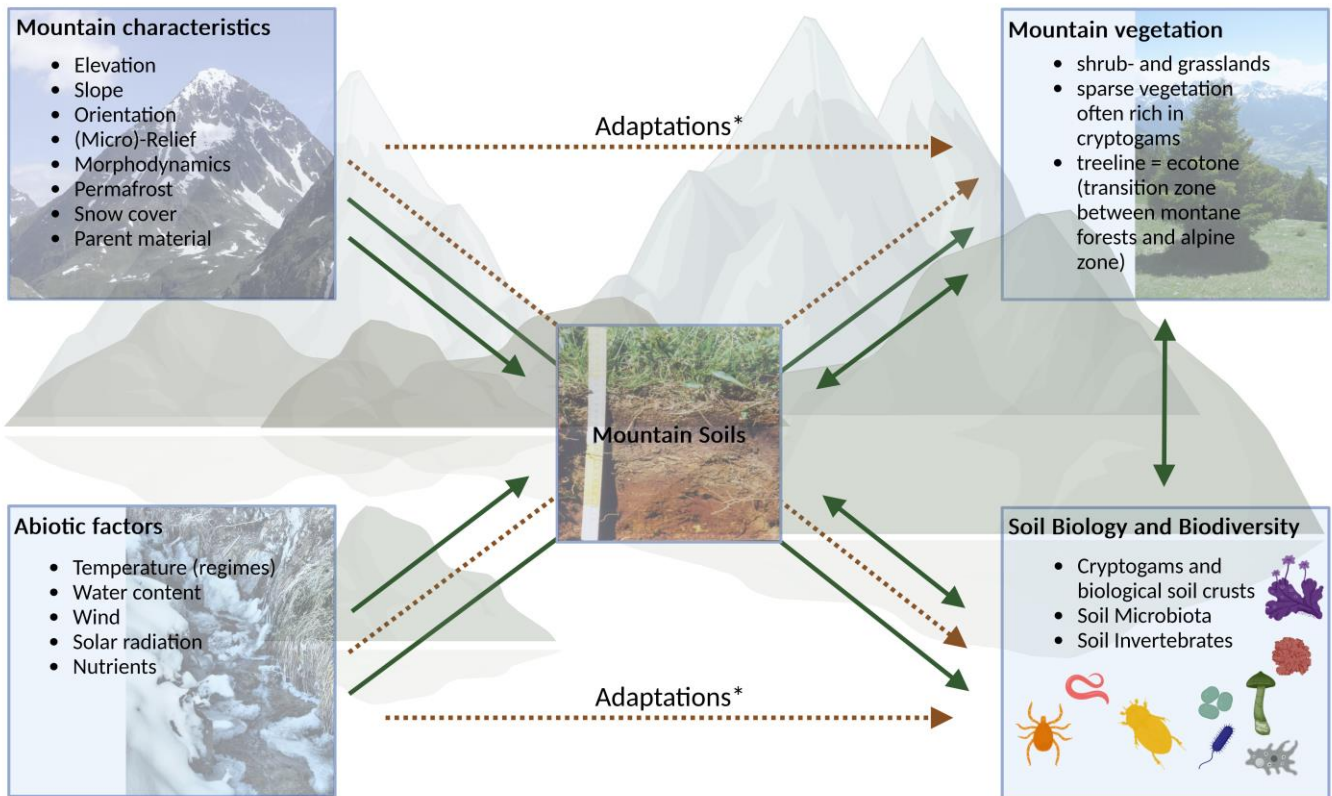

—•••••—> factors leading to the adaptation of organisms    —> influence

\* dormancy, storage of carbohydrates in roots/rhizomes, lipids in old leaves, size (reduction), changed metabolic rates

247  
248 **Fig. 2.** Overview of mountain characteristics and abiotic factors, influencing alpine landscape, mountain  
249 soils, and soil organisms.

## 250 (2) Vegetation

252 Mountain ecosystems above the treeline consist of alpine shrub- and grasslands that gradually give way  
253 to high alpine areas extending into the zone of perennial snow and ice. These alpine areas typically have  
254 sparse vegetation but often rich cryptogam communities. The treeline itself is a transition zone, a so-called  
255 ecotone, between the higher montane forest, often dominated by coniferous trees, and the alpine zone.

256 The abundance of plant species and their distribution are determined by temperature, water availability,  
257 and the duration of snow cover, which results from the interacting effects of temperature, precipitation,  
258 topography, and wind (Rodwell, 1992a, 1992b; Thompson & Brown, 1992; Panchard *et al.*, 2023). Alpine  
259 grasslands share many structural and functional traits and characteristics with polar grass-dominated tundra

260 ecosystems (Riebesell, 1982; Janišová *et al.*, 2011; Dengler *et al.*, 2014), and in both systems, low air- and  
261 soil temperatures are an important factor for plant growth. Frost often limits the growth of trees and shrubs  
262 (Peel, Finlayson & McMahon, 2007), whereas permafrost (i.e. continuous frost conditions) controls the  
263 entire soil system and slows down all biotic activity (Parolo & Rossi, 2008; Zollinger *et al.*, 2013; Goordial  
264 *et al.*, 2016; Giaccone *et al.*, 2019; Jin *et al.*, 2020). At the upper limit of grasslands, occasionally increased  
265 aridity and shortened vegetation periods cause poikilohydric cryptogamic organisms to gradually replace  
266 the standing euryhydric phanerogams (Körner, 2021).

267 Adaptations of alpine vegetation to short and cold growing seasons include the ability to metabolise  
268 rapidly at low temperatures, the transition to dormancy as a strategy to withstand the rigours of winter, and  
269 the storage of carbohydrates in roots/rhizomes or of lipids in old leaves for regrowth and flower primordia  
270 formation (Billings, 1974) (Fig. 2). Alpine plants are also adapted to intense solar radiation, as well as to  
271 extended periods of dehydration. Whereas the structure and composition of alpine vegetation depends on  
272 soil type and the chemical and physical properties of soil, plant communities, in turn, influence soil  
273 structure, properties, and stability.

#### 274 275 276 **IV. CRYPTOGRAMS AND BIOLOGICAL SOIL CRUSTS**

##### **KEY ASPECTS**

- Cryptogam communities are widely distributed across different elevational zones in alpine regions
- Biological soil crusts are mainly restricted to high alpine areas.
- Lichen and bryophyte diversity and productivity decline above the treeline towards the nival belt, but at slower rates than that of vascular vegetation.
- The composition of lichen and bryophyte communities is strongly related to bedrock chemistry and soil texture.
- Climate change causes bryophytes to move upwards, whereas at lower elevations sensitive and rare lichens and bryophytes are endangered by vascular plant growth.
- We found 137 publications dealing primarily with alpine cryptogams (i.e. 16 for biological soil crusts and 121 for cryptogams in general), mainly from the mountain regions of Central & Southern Europe (29.9%), Northern Europe (26.3%), and Central Asia (14.6%); see Fig. 1, 3, and Table S4.

277

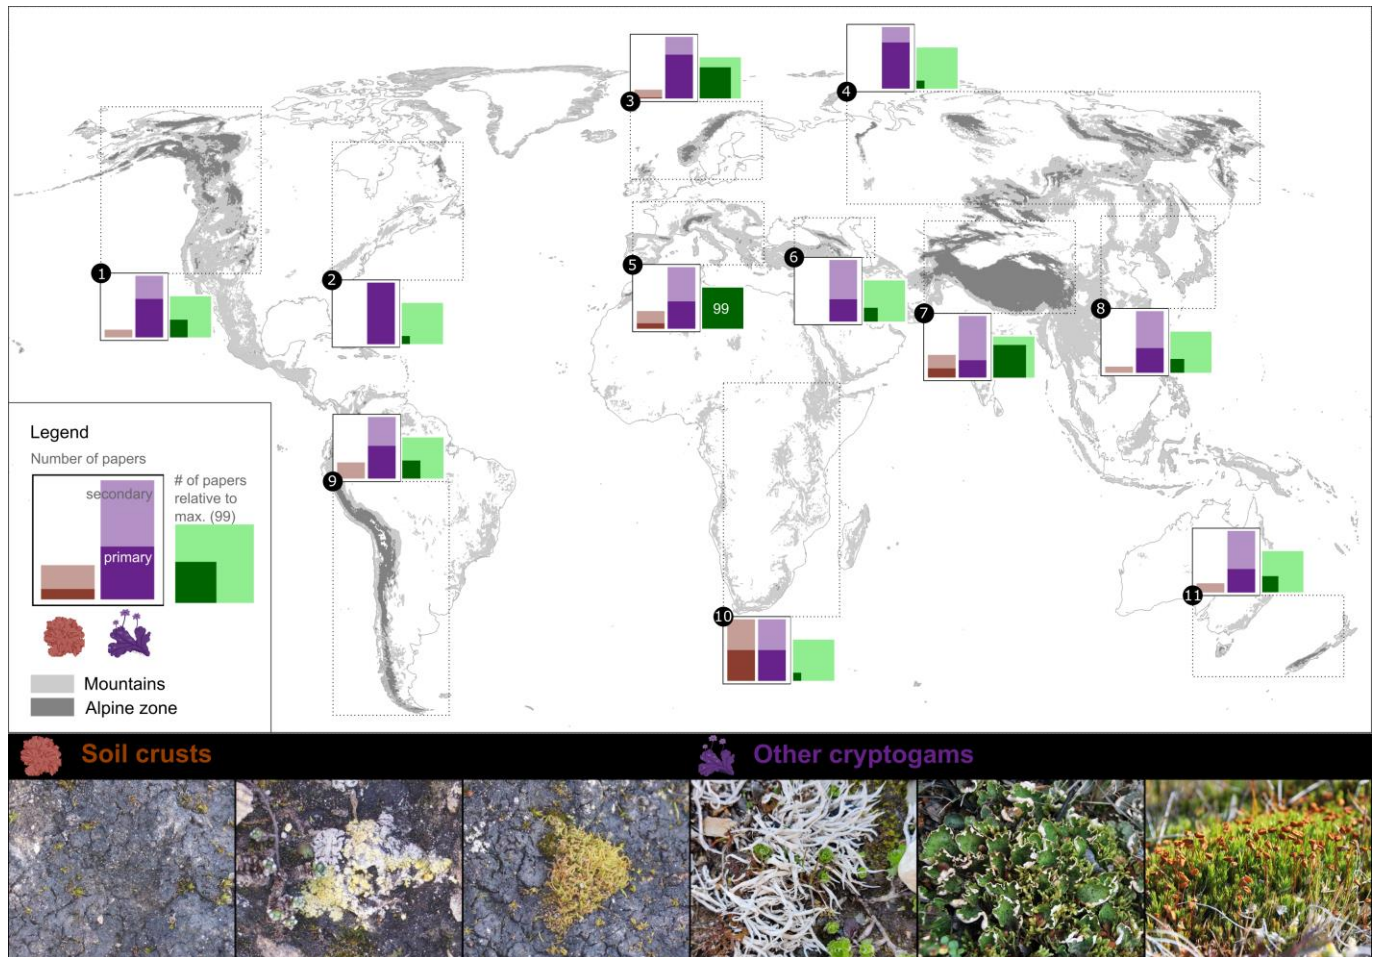

**Fig. 3.** Global map of available scientific articles focusing on cryptogams in alpine mountain soils. Number of publications is given per crust type and relative to the maximum of papers found (Central & Southern Europe): the dark-coloured part of the bar represents those papers where the organismic group was likely the primary object, the light-coloured part represents those papers where the organismic group was mentioned, but not as the main subject of the publication. See Appendix S1 for a detailed description of the methods and full lists of publication numbers per region and soil organism group. Photos from left to right: Soil crusts: cyanobacteria-dominated soil crust (dark surface colouration) intermingled by bryophytes, in alpine zone of Großglockner, Austria (credit: Stefan Herdy); cyanobacteria-dominated biocrust mixed with chlorolichens, dominated by *Fulgensia* sp., alpine zone of the Großglockner, Austria (credit: Stefan Herdy); cyanobacteria-dominated biocrust mixed with mosses, dominated by *Tortella* sp., alpine zone of the Großglockner, Austria (credit: Stefan Herdy); Other cryptogams: arctic-alpine lichen *Thamnolia vermicularis*, alpine zone of the Großglockner, Austria (credit: Stefan Herdy); arctic-alpine lichen *Peltigera aphosa* in vicinity of Kangerlussuaq, Greenland (credit: Bettina Weber); moss *Polytrichum* sp. in vicinity of Kangerlussuaq, Greenland (credit: Bettina Weber).

## 294 (1) Cryptogams

295 Cryptogams are non-vascular organisms that do not form flowers and seeds but reproduce by fission,  
296 fragmentation, and spores. They comprise lichens, bryophytes, eukaryotic algae, and cyanobacteria (Büdel,  
297 Friedl & Beyschlag, 2023). Cryptogams occur widely at different elevations in alpine regions, where they  
298 grow epiphytically on vascular plants as well as on and within rocks (saxicolous) and on soil. In some cases,  
299 soil-inhabiting (epigaeic) organisms form biological soil crusts (abbreviated as biocrusts). Since biocrusts  
300 are defined as an ‘intimate association between soil particles [...] and organisms which live within, or  
301 immediately on top of, the uppermost millimetres of the soil’ (Weber *et al.*, 2022), they do not include  
302 fruticose lichen and bryophyte carpets, which mainly grow above the soil and form valuable vegetation  
303 components on their own. A detailed description of alpine biocrusts is given in Chapter IV.2 below.

304 In Europe, descriptions exist for 200 lichen species in the nival belt of the Alps, with a remarkable  
305 development of the genera *Cetraria*, *Parmelia*, and *Umbilicaria* (Ozenda & Borel, 2003). The number of  
306 bryophytes and macrolichens increases towards the North, with 439 species of bryophytes in the Italian  
307 Alps (Pedrotti & Grafta, 2003), 65 bryophyte and 218 lichen species in the south-eastern Carpathian  
308 Mountains (Coldea, 2003), 150–200 species of lichens in the Pyrenees (Gómez, Sesé & Villar, 2003), and  
309 about 558 bryophyte species in the Southern and Northern Scandes (Virtanen *et al.*, 2003). Areas with the  
310 highest species richness of bryophytes but also the highest numbers of threatened species, are located in the  
311 eastern European Alps, Carpathian Mountains, eastern Pyrenees, and the Scandes (Hodgetts *et al.*, 2019).  
312 The highest elevational records for lichens and bryophytes are found in the subtropical Dry Andes, near the  
313 summit of Socompa volcano at 6,060 m (Halloy, 1991) and on Mount Everest, Himalaya at 7,400 m  
314 (*Lecidea vorticosa* (FLÖRKE) KÖRB. and *Pertusaria bryontha* (ACH.) NYL.; (Miehe, 1988).

315 Grassland ecosystems contain a high diversity of cryptogamic autotrophs, especially bryophytes and  
316 lichens, whose occurrence is primarily determined by elevation and exposition (Cleavitt, 2004; Daniëls *et*  
317 *al.*, 2004; Baniya *et al.*, 2012; Rai, Upreti & Gupta, 2012). Their diversity and productivity follow the  
318 same elevational gradients of temperature and aridity as phanerogams (Sundstøl & Odland, 2017); species  
319 richness of lichens, bryophytes, and algae increase above the treeline and progressively decline towards the  
320 nival belt (Austrheim, 2002; Vittoz *et al.*, 2010).

321 In temperate central European mountains, alpine grasslands are characterised by the presence of large  
322 meadows dominated by genera including *Festuca* and *Carex* (Ozenda, 1988), driven by the presence of a  
323 long-standing, deep snow cover, which melts relatively fast in spring. In this region, communities  
324 dominated by bryophytes and lichens cover only relatively small areas. In contrast, in Central Asian and  
325 Scandinavian mountains, higher aridity or a stronger clearing of snow cover by wind promotes communities  
326 richer in cryptogams and less dominated by graminoids. This trend is also observed in continental Nearctic  
327 mountain ranges such as the Rocky Mountains (Leuschner and Ellenberg 2017). In all mountain ranges,  
328 snow abrasion poses a major mechanical challenge to alpine vegetation of exposed habitats (Wieser,

329 Holtmeier & Smith, 2014) and promotes the development of stress tolerant cryptogamic communities in  
330 windswept localities.

331 The topographic heterogeneity found in high alpine slopes tends to intersperse grasslands with azonal  
332 communities of saxicolous, terricolous, and chasmophytic cryptogams that colonise skeletal soils and  
333 patches of exposed mineral substrate. These azonal patches become more abundant towards the nival zone  
334 and in arid or windswept localities. There, some fruticose lichens and pleurocarpous mosses grow among  
335 graminoid patches and are thereby an integral part of alpine grasslands. The lower dependence of  
336 cryptogams on substrate presence can create highly discordant diversity patterns between cryptogams and  
337 vascular plants, as well as among cryptogam groups (Di Nuzzo *et al.*, 2021). However, moss and  
338 phanerogam richness also showed a strong correlation with soil richness and diversity on the  
339 Hardangervidda plateau in Norway (Vestvidda, Southern Scandes), whereas there was no correlation with  
340 liverworts (Odland, Reinhardt & Pedersen, 2015). In Palearctic and Nearctic mountains, *Cladonia* species  
341 and pleurocarpous mosses such as *Pleurozium* sp. tend to dominate towards the treeline, while cetrarioid  
342 species or *Thamnolia* sp. become more common towards the upper part of the gradient.

343 The exact composition of lichen communities varies significantly, depending on the bedrock chemistry  
344 and resulting texture of the mineral fraction of local soils (Guo & Cao, 2001). Calcium-rich spring seeps  
345 were observed to form a refugium harbouring a rich variety of bryophytes and lichens (Miller, Fryday &  
346 Hinds, 2005). Conversely, areas with higher water retention and permanently flooded soils develop into  
347 bryophyte dominated bogs mostly shaped by *Sphagnum* species and pleurocarpous mosses (Halsey, Vitt &  
348 Gignac, 2000; Wahren, Williams & Papst, 2001; Bragazza, Gerdol & Rydin, 2003). Also in wetlands,  
349 fens, springs, and snowfields, cryptogams can reach high diversity (Dierssen & Dierssen, 2005; Cooper *et*  
350 *al.*, 2010; Austin & Cooper, 2016). In alpine fellfields, cryptogams are a prominent component, with  
351 lichens covering up to about 50% of the surface area on the Beartooth Plateau, Montana and Wyoming  
352 (Greater Yellowstone Rockies; Eversman, 1995). Generally, lichen communities develop on substrates  
353 with little mechanical perturbation under changing hydration conditions. Wet and soft soils of glacier  
354 forefields are not colonised by lichens. Soils in many windswept localities are typically colonised by  
355 fruticose lichens, which usually interlock with shrubby plants rather than being connected with the soil. In  
356 contrast to a common notion of lichens as pioneer vegetation, crustose lichens in biocrust communities need  
357 not only soil stability but also long stable time intervals to develop, and they can suffer extinction due to  
358 shading from nearby plants. One means by which evolution has made it possible for lichens to overcome  
359 competition with plants or unsuitable soil conditions is by the development of shrublike fruticose  
360 morphologies, which grow as lichen heath and pleurocarpous mosses between persistent plant vegetation  
361 such as dwarf shrubs (e.g. genera *Vaccinium*, *Salix*, and *Erica* with *Hypnum cupressiforme* HEDW.;  
362 Schellenberg & Bergmeier, 2020).



363 Compared to phanerogams, which show high levels of endemism, lichens associated with alpine  
364 grasslands have very broad distributions, often being apparently sub-cosmopolitan. This interregional  
365 connectivity in arctic-alpine organisms has been studied in lichens (Fernández-Mendoza & Printzen, 2013;  
366 Garrido-Benavent & Pérez-Ortega, 2017; Onuț-Brännström, Tibell & Johannesson, 2017), but also occurs  
367 in bryophytes (Mirek & Piekos-Mirkowa, 1992), and seems to reflect range expansions originating from  
368 interregional connectivity during the Pleistocene. This does not exclude the rare endemism of lichens at  
369 higher elevations, which can be due to substrate conditions that are not or hardly found elsewhere, or to  
370 habitat shrinkage due to climatic factors (e.g. *Cetradonia linearis* (A.EVANS) J.C.WEI & AHTI is only found  
371 in few localities in the Appalachian Mountains; Woodward, 2021).

372 While soil properties are key in determining cryptogam presence and composition, effects are reciprocal,  
373 and cryptogams also influence soil properties. For example, in an alpine *Vaccinium* thicket accompanied  
374 by *Polytrichum strictum* MENZIES EX BRIDEL and *Sphagnum* sp., the moss cover caused a pedogenic  
375 feedback by increased water storage, which promoted stronger weathering and increased dissolved organic  
376 C contents in the soil. The latter then caused the soil to cross the threshold of podsolisation (Musielok *et*  
377 *al.*, 2021). Similarly, mat-forming lichens have also been shown to influence litter decomposition and  
378 buffer soil temperatures in subalpine and alpine environments (van Zuijlen *et al.*, 2020; Mallen-Cooper,  
379 Graae & Cornwell, 2021). Mosses, in turn, have been reported to mediate soil properties such as  
380 temperature, moisture, and C:N ratios, with varying effects depending on the shrub species under which  
381 they occur (Bueno *et al.*, 2016). Generally, lichens and mosses also contribute to soil stability and reduce  
382 erosion in alpine environments (Martin *et al.*, 2010).

383 The interactions between plants and lichens have also been explored (Favero-Longo & Piervittori,  
384 2010). Most notably, the elimination of fruticose lichens, especially cetrarioid species, has been shown to  
385 significantly reduce the growth of neighbouring grasses and sedges (Jespersen, 2013), probably as a result  
386 of changes in microclimate, surface water retention, and protection from run-off. In an experimental  
387 approach, presence of most lichens facilitated seedling recruitment, while only very thick mats of *Cladonia*  
388 *stellaris* (OPIZ) POUZAR & VĚZDA had an inhibitory effect (Nystuen *et al.*, 2019). Interactions between  
389 vascular plants and bryophytes are also variable. *Ptilium crista-castrensis* DE NOTARIS, a feather moss, was  
390 observed to have a negative effect on the survival of alpine tree seedlings, likely due to altered competition  
391 or nutrient availability, whereas *Sphagnum* mosses had no effect (Lett *et al.*, 2020). In contrast, a study in  
392 a boreal forest-tundra ecotone (Central Labrador Ranges, Canada) revealed that a *Pleurozium schreberi*  
393 MITTEN seedbed improved seed emergence, survival, and nutrient availability for black spruce (Wheeler,  
394 Hermanutz & Marino, 2011). Similarly, *Racomitrium lanuginosum* BRIDEL, mats stimulated growth of the  
395 sedge *Carex bigelowii* TORR. EX SCHWEIN. in the alpine/subarctic tundra of Swedish Lapland (Carlsson &  
396 Callaghan, 1991).

397 Effects of environmental changes on cryptogams are likely diverse. Climate change in alpine regions  
398 generally causes a shift of bryophytes to higher elevations (Wen *et al.*, 2022), whereas nutrient input, CO<sub>2</sub>  
399 increase, or warming, cause vascular plant productivity to increase at the cost of sensitive and long-  
400 established soil lichen and bryophyte communities (Graglia *et al.*, 2001; Klanderud, 2008; Dawes *et al.*,  
401 2017). Such changes in plant communities also affect microbial community composition, which may result  
402 in altered biogeochemical cycling (Bueno de Mesquita *et al.*, 2017).

403 Anthropogenic drivers, such as grazing, trampling, and N deposition also affect cryptogams in complex  
404 and multiple ways. For instance, the effects of grazing are variable. Grazing in extensively farmed  
405 secondary grasslands has been shown to increase the diversity and coverage of bryophytes and lichens due  
406 to a decreased competition for light (Nascimbene, Fontana & Spitale, 2014). On the other hand, in mid-  
407 elevation pastures in India (3000–3400 m), where significant grazing by cattle occurs, lichen diversity is  
408 reduced compared to higher (3400–4000 m) and lower (2700–3000 m) habitats (Rai *et al.*, 2012). In the  
409 Uinta Mountains of Utah (Western Rocky Mountains), grazing favoured the growth of crustose or  
410 squamulose lichens, whereas in ungrazed areas fruticose and foliose taxa also occurred (St. Clair *et al.*,  
411 2007). Vascular plants are also influenced, since further effects of (heavy) grazing include an increase in  
412 root biomass (Mayel, Jarrah & Kuka, 2021), also in alpine meadows (Yang *et al.*, 2018), likely resulting  
413 from increased rates of nutrient cycling due to herbivore excretion. The effects of human trampling include  
414 the reduction of lichen abundance and diversity in an alpine heath ecosystem in northern Sweden  
415 (Jägerbrand & Alatalo, 2015) as well as a reduced coverage of the moss *Pleurozium schreberi* (WILLD. EX  
416 BRID.) MITT. in a subarctic grassland (Sørensen *et al.*, 2009).

417 Finally, existing evidence for the effects of N deposition on cryptogams includes a loss in moss cover in  
418 an alpine *Racomitrium* moss-sedge heath in the United Kingdom (Britton *et al.*, 2018), a general decline in  
419 richness, and a community shift from bryophytes and lichens towards graminoids (Nilsson *et al.*, 2002;  
420 Armitage *et al.*, 2014; Britton *et al.*, 2019). Declines in moss cover are possibly due to the positive effects  
421 of N deposition on the growth of moss-associated fungi (Taylor *et al.*, 2022). In a study in Norway, N  
422 addition caused a decrease in lichen cover and size (Fremstad, Paal & Mols, 2005), whereas in northern  
423 Sweden, N, P, and K fertilisation positively affected bryophyte biomass (Haugwitz & Michelsen, 2011).

424 After disturbance, succession under natural conditions or facilitated by restoration measures may help  
425 to reach the natural vegetation state again. In a study investigating the succession on alpine soil heaps in  
426 western Norway, it took about 30 years until the bryophyte and lichen cover and species richness was  
427 similar to the surrounding area (Rydgren *et al.*, 2011). Similar results were also obtained in a separate study,  
428 where gamma diversity of cryptogams peaked 23 to 28 years after cessation of ploughing and fertilising  
429 subalpine grasslands (Austrheim & Olsson, 1999). In a study on habitat restoration after clearcutting of  
430 non-indigenous *Pinus mugo* TURRA in the Eastern Sudetes (Bohemian Massif), bryophyte diversity was  
431 mapped and compared to that in areas of undisturbed dwarf pine canopy and in autochthonous grassland

432 areas. The results revealed a habitat homogenisation, as related to bryophytes, nine years after the impact,  
433 and suggested that restoration measures, in addition to clear-cutting, might be helpful to enhance restoration  
434 speed and quality (Zeidler *et al.*, 2022). In a different study in Iceland, application of shredded turf led to a  
435 quick increase in bryophyte cover and thus might form a valuable restoration measure (Aradottir, 2012).

## 437 (2) Biocrusts

438 As a pioneer community in alpine environments, biological soil crusts (biocrusts) comprise a dense layer  
439 of cyanobacteria, green algae, lichens, and bryophytes that covers the soil surface (Gold, Glew & Dickson,  
440 2001; Huber *et al.*, 2007; Karsten & Holzinger, 2014; Mikhailiyuk *et al.*, 2015; Weber, Büdel & Belnap,  
441 2016) and grows in patches between vascular plants (Türk & Gärtner, 2003). Unlike lichen and bryophyte  
442 carpets, biocrusts do not elevate much above the soil surface. However, their presence and activity play a  
443 crucial role in forming soil aggregates, thereby enhancing soil stability. Early successional communities  
444 are dominated by cyanobacteria, which facilitate the gradual colonisation by lichens and bryophytes under  
445 suitable conditions. A more detailed definition of biocrusts and their delimitation against other cryptogam  
446 communities was published by Weber *et al.* (2022). Whereas cryptogams occur widely in alpine grasslands,  
447 biocrusts are mainly restricted to the high alpine zone, where they can achieve very large cover values. In  
448 the Austrian Alps (Hochtor, High Tauern), for example, biocrust coverage reached up to 30% of the surface  
449 area in the studied homogeneous vegetation unit (Büdel *et al.*, 2014), with a high prevalence of  
450 cyanobacteria, which has also been observed in Himalayan soils (Reháková, Chlumská & Doležal, 2011).  
451 An increase with elevation was also detected for cyanobacterial biomass in cyanobacteria-dominated  
452 biocrusts in the Zanskar Range (Himalaya; Janatková *et al.*, 2013).

453 The occurrence and composition of biocrusts in alpine regions appear to be mainly influenced by habitat  
454 availability and precipitation (Büdel *et al.*, 2009; Lütz, 2012; Jung *et al.*, 2018; Xiao *et al.*, 2020). Biocrust  
455 activity status, in turn, is regulated by morphological, physiological, and local microclimatic conditions  
456 (Longton, 1988; Tamm *et al.*, 2018). Additional variables affecting biocrust occurrence include elevation,  
457 aspect, snowpack, dust input in alpine areas, as well as standing vegetation (Miller, 2009; Sun *et al.*, 2013;  
458 Mejia *et al.*, 2020; Peer *et al.*, 2022). Across four mountain ranges at high elevation in Ladakh, India,  
459 cyanobacterial occurrence along an elevational gradient from 3,700–5,970 m was mainly determined by  
460 the studied mountain range, but also elevation and vegetation type were relevant (Reháková *et al.*, 2011).  
461 Whereas *Oscillatoriales* mostly occurred on alpine meadows, *Nostocales* were dominant in the subnival  
462 zone and screes.

463 Thawing of permafrost and glaciers produce particularly suitable habitats for biocrusts. Accordingly,  
464 apart from long-established cryptogam communities, (cyano-)bacteria, (lichenised) fungi, and algae play a  
465 key role in primary substrate colonisation after glacier retreat. This has been investigated in different alpine  
466 regions around the world, including Norway, Chile, Peru, and in the European Alps (Frey *et al.*, 2013;

467 Bilovitz *et al.*, 2014b; Matthews & Vater, 2015; Krisai-Greilhuber *et al.*, 2017). In Tierra del Fuego, Chile  
468 (Cordillera Darwin, Patagonian Andes), bacterial communities with cyanobacteria and algae of the order  
469 *Prasiolales* were the dominating groups close to the glacier terminus, whereas lichen-forming and parasitic  
470 fungi occurred in early successional stages (Fernández-Martínez *et al.*, 2017). Cyanobacteria hosted by  
471 bryophytes and fertilising the immature soils by actively fixing atmospheric N were also observed 4–7  
472 years after deglaciation (Arróniz-Crespo *et al.*, 2014). Cyanobacteria were further described to play a vital  
473 role in primary succession with respect to both C and N fixation and soil stabilisation at high elevations  
474 (5,000 m) in the Cordillera de Vilcanota (Cordillera Oriental, Peru) (Schmidt *et al.*, 2008). In the case of  
475 lichens, multiple studies in the European Alps describe an increasing abundance and diversity with moraine  
476 age (e.g. Bilovitz *et al.*, 2014b, 2014a, 2015) and higher coverage compared to the surrounding non-  
477 glaciated area (Hestmark, Skogesal & Skullerud, 2007). In central Svalbard, repeated surveys of glacier  
478 forefields 10–20, 30–50, and 80–100 years after glaciation detected a marked shift in cryptogam community  
479 structure over time (Pessi *et al.*, 2019).

480 Biocrusts provide ecosystem services via their functions in soil stabilisation, N and C fixation, nutrient  
481 accumulation, and water retention (Gold *et al.*, 2001; Huber *et al.*, 2007; Peer, 2010; Zheng *et al.*, 2014;  
482 Jung *et al.*, 2018; Borchhardt *et al.*, 2019). They are further known for improving soil microenvironments,  
483 mainly due to the activity of microorganisms within the biocrust (Wei *et al.*, 2022). In the case of glacier  
484 forefields, cyanobacteria fix and thus provide N to the strongly N-limited raw soils, with rates directly  
485 related to the availability of organic C (Wang *et al.*, 2021). High N fixation rates by alpine *Collema*-  
486 dominated biocrusts in the mountains of Western Canada (i.e. Chilcotin Plateau (British Columbia Interior)  
487 and Southern Icefield Ranges (Saint Elias Mountains)) suggest an important contribution of cyanolichens  
488 to ecosystem N budgets (Marsh *et al.*, 2006). While Antarctic and alpine biocrusts show similarities in  
489 composition, alpine biocrusts seem to be much more physiologically active than their polar counterparts  
490 (Colesie *et al.*, 2014, 2016), with activity rates closely linked to the local climatic conditions (Raggio *et al.*,  
491 2017).

492 An additional effect of biocrusts is their influence on soil temperature. This was shown for instance on  
493 the Tibetan Plateau, where Ming *et al.* (2022) found that at a depth of 5 to 100 cm, soil temperatures were  
494 0.6–1.0 °C lower in the presence of biocrusts; Xu *et al.* (2020) showed similar effects for moss-dominated  
495 biocrusts. These results differ from previous studies, where biocrusts increased surface temperatures due to  
496 their dark colour (Chamizo *et al.*, 2013). A possible explanation is the high insulating potential of soil  
497 organic matter and the high water-holding capacity of the local biocrusts (Ming *et al.*, 2022). Biocrusts on  
498 the Tibetan Plateau (i.e. Min Mountains and Qilian Mountains), were also observed to significantly reduce  
499 soil pH in the upper 10 cm (Xu *et al.*, 2020) and to impact seed germination, thus influencing vascular plant  
500 community composition (Li *et al.*, 2016). In another study, biocrusts tended to support the survival of

501 *Nothofagus pumilio* (POEPP. & ENDL.) KRASSER tree seedlings in the southern Patagonian Andes (Pissolito,  
502 Garibotti & Villalba, 2021).

503 Besides their effects on environmental conditions, biocrusts also comprise various bacterial  
504 communities. Bacterial composition within biocrusts appears to be strongly impacted by the dominating  
505 photoautotrophs (i.e. cyanobacteria, algae, lichens, or bryophytes), whereas for microfungi such a link  
506 could not be observed (Maier *et al.*, 2018; Abed *et al.*, 2019). Along an aridity gradient on the Tibetan  
507 Plateau, algae-dominated biocrusts hosted more diverse bacterial communities, with diversity increasing  
508 with rising aridity, while in lichen-dominated biocrusts bacterial communities were less diverse and  
509 bacterial diversity decreased with rising aridity. Whereas the bacterial communities differed depending on  
510 the biocrust type, they were also influenced by environmental and stochastic processes (Wei *et al.*, 2022).  
511 In alpine biocrusts, the soil–lichen interface was colonised by characteristic bacteria, namely  
512 Alphaproteobacteriota and Acidobacteriota (Muggia *et al.*, 2013).

513 Adaptive strategies of lichens to severe conditions in alpine regions include accumulation of UV-  
514 absorbing phenolic usnic acid and storage of polyols for protection of cellular constituents during  
515 desiccation (Bligny & Aubert, 2012; Armstrong, 2017). Protective strategies of terrestrial, photosynthetic  
516 green algae include photoprotection, non-photochemical quenching and flexibility of secondary cell walls  
517 (Karsten & Holzinger, 2014; Kitzing, Pröschold & Karsten, 2014). Diurnal freeze–thaw cycles that  
518 frequently occur in high alpine habitats were shown to have no negative impact on the growth of  
519 cyanobacteria-dominated biocrusts collected in the Peruvian mountains of the Cordillera Oriental (Schmidt  
520 & Vimercati, 2019).

521 Land use by agriculture and recreational activities can cause severe damage to high-mountain  
522 ecosystems, including their biocrusts. On high elevational grasslands of the Ötztal Alps (European Alps) in  
523 Tyrol, Austria, for example, even weak trampling pressure caused a decrease in the frequency of sensitive  
524 species, including fruticose and crustose lichens (Grabherr, 1982). Also, in the Canadian Rockies of  
525 Alberta, recreational trails had substantially lower coverage of lichens and biocrusts, as compared to  
526 undisturbed sites (Crisfield, Macdonald & Gould, 2012). After disturbance of biocrusts in alpine habitats,  
527 restoration could be facilitated by inoculation with mature biocrusts (Letendre, Coxson & Stewart, 2019).  
528 Climate change poses another threat: In Switzerland, the observed increase in the mean elevation of  
529 bryophytes, driven by extinction of cryophilous species at lower elevations and by an upward movement at  
530 their upper range limits, was likely a result of recent climate change (Bergamini, Ungricht & Hofmann,  
531 2009). Changes in bryophyte and lichen species richness, cover, and composition were also observed during  
532 a 15-year period from 2001 and 2015 in the Southern Scandes of Norway, with an effect on species  
533 interactions. For lichens, the observed decrease in species richness and cover over time was attributed to  
534 the increased competition with vascular plants (Vanneste *et al.*, 2017).

536

## V. SOIL MICROBIOTA

### KEY ASPECTS

- Soil microorganisms are essential for mineralization processes, nutrient cycling and for many symbiotic relationships with plants and animals.
- The very great majority of soil microorganisms cannot be investigated by culture-based approaches that, therefore, need to be further improved.
- Knowledge about the enormous microbial diversity in alpine soils is distinctly increasing since the advent of high-throughput molecular methods.
- Microbial diversity is determined by complex interactions with abiotic soil properties such as soil pH, water content and quality and quantity of organic matter.
- Changes in microbial communities can have cascading effects on other components of the ecosystem.
- Fungal diversity is more strongly influenced by plants than the diversity of prokaryotes.
- Patterns of diversity and effects of abiotic and biotic drivers are distinctly group specific.
- We found 412 publications dealing primarily with alpine microbial soil diversity (i.e. 16 for archaea, 190 for bacteria, 184 for fungi, and 23 for protists), mainly from the mountain regions of Central Asia (50.7%), Central & Southern Europe (25.0%), and the North American Cordillera (6.8%); see Fig. 4 and Table S5.

537

538

539

540

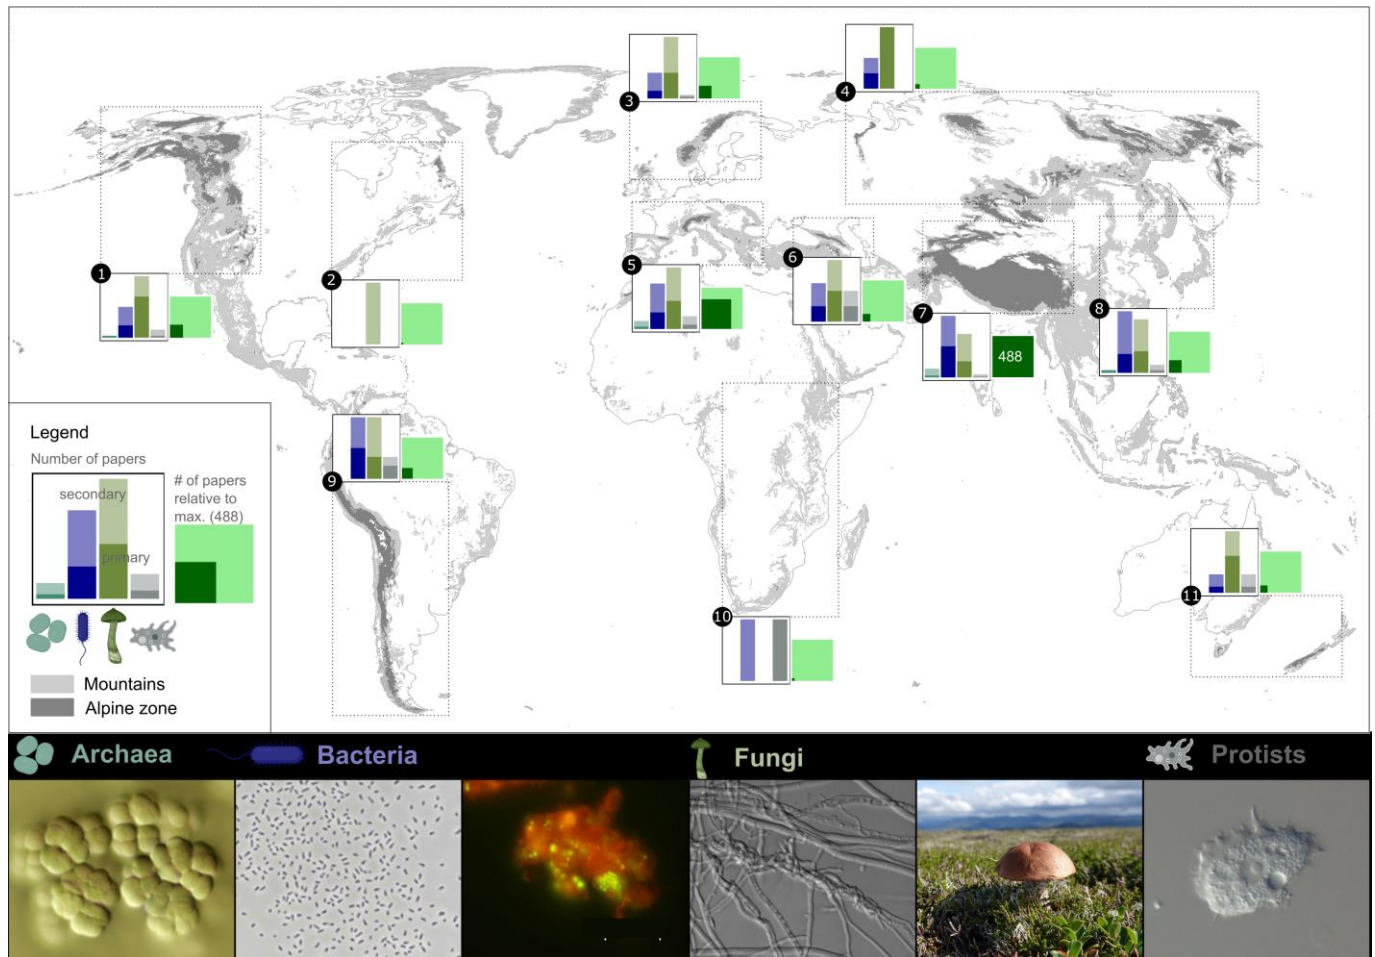

**Fig. 4.** Global map of available scientific articles focusing on microbial diversity in alpine mountain soils. Number of publications are given per microbial group and relative to the maximum of papers found (Central Asia): the dark-coloured part of the bar represents those papers where the organismic group was likely the primary object, the light-coloured part represents those papers where the organismic group was mentioned, but not as the main subject of the publication. See Appendix S1 for a detailed description of the methods and full lists of publication numbers per region and soil organism group. Photos from left to right: Archaea: *Methanosarcina* sp. (credit: Paul Illmer), Bacteria: *Methylosinus sporium* (credit: Nadine Praeg), DNA (green) stained microscope preparation of soil bacteria attached to soil particle (red) (credit: Nadine Praeg & Paul Illmer), Fungi: *Trichoderma asperellum* intercoiled with *Botrytis* sp. (credit: Siebe Pierson), *Leccinum vulpinum* (credit: Andrea J. Britton), Protists: *Acanthamoeba* sp. (credit: Kenneth Dumack).

#### (1) Bacteria and Archaea (Prokaryotes)

Prokaryotes include two distinct phylogenetic domains, archaea and bacteria, which are both characterised by the absence of a cell nucleus. Most prokaryotes are unicellular and reproduce asexually. Due to a very high metabolic diversity (various chemo- and phototrophic ways of life), prokaryotes colonise almost every ecological niche on Earth.

559 A significant proportion of prokaryote diversity studies on high alpine soils (King *et al.*, 2010; Yashiro *et al.*, 2016) and alpine permafrost have been conducted on the Tibetan Plateau in Central Asia, which  
560 harbours the largest area of mountain permafrost soils globally (Cheng *et al.*, 2022), resulting in 54 % of  
561 all prokaryote diversity studies in mountain soils being performed in Central Asia (Fig. 4). Studies  
562 addressing microbial diversity (all prokaryotes, selected studies also including fungi and protists) in  
563 mountain permafrost outside of China were conducted recently in the European Alps (Frey *et al.*, 2016;  
564 Luláková *et al.*, 2019; Praeg, Pauli & Illmer, 2019; Adamczyk, Rüthi & Frey, 2021; Sannino *et al.*, 2021)  
565 and high-elevation soils from the Andes, Rocky Mountains, and Alaskan Brooks Range (Lipson &  
566 Schmidt, 2004; Nemergut *et al.*, 2005; King *et al.*, 2010; Ricketts *et al.*, 2016; Wagner *et al.*, 2017; Farrer  
567 *et al.*, 2019). Despite partially harsh environmental conditions, mountain soils harbour a considerable  
568 bacterial diversity (Rime *et al.*, 2015; Frey *et al.*, 2016). Bacteria contribute substantially to  
569 biogeochemical cycles, both at the regional and supraregional scale (Donhauser & Frey, 2018) and together  
570 with archaea (and fungi, see Section V.2) are considered fundamental in stabilising soils and influencing  
571 the physical and biological development of soil ecosystems (Bernasconi *et al.*, 2011). Prokaryotic  
572 colonisers contribute significantly to the initial build-up of biomass, by fixation of atmospheric CO<sub>2</sub> and  
573 N<sub>2</sub> (Frey *et al.*, 2013), and using C and N from (microbial) necromass (Zumsteg, Schmutz & Frey, 2013b;  
574 Rime *et al.*, 2016b; Donhauser *et al.*, 2021). Quantification of precise amounts of CO<sub>2</sub> and N<sub>2</sub> fixation and  
575 usage of dead microbial cells as a non-negligible C pool in mountain soils is challenging due to the  
576 complexity and variability of mountain soils and is still lacking. Further nutrients, such as P and S, may be  
577 obtained from the bedrock by biological weathering (Frey *et al.*, 2010; Brunner *et al.*, 2011). As glaciers  
578 increasingly retreat with climate change, barren bedrock is exposed and colonised by pioneer  
579 microorganisms such as Acidobacteriota, Planctomycetota and Bacteroidota (Zumsteg *et al.*, 2012; Rime  
580 *et al.*, 2015; Rime, Hartmann & Frey, 2016a). From permafrost soils, bacterial candidate phyla OD1, TM7,  
581 GN02 and OP11 forming the superphylum Patescibacteria were recovered besides well-established phyla,  
582 such as Proteobacteria, Verrucomicrobiota and Acidobacteriota and were found to represent one third of  
583 the entire community (Frey *et al.*, 2016). At lower elevations, e.g. in alpine grasslands, bacterial  
584 communities are primarily dominated by Acidobacteriota (subgroup6, Acidobacteria), Actinobacteriota  
585 (Actinobacteria, Thermoleophilia), Proteobacteria (Alpha- and Gammaproteobacteria), Bacteroidota  
586 (Bacteroidia), and Verrucomicrobiota (Yuan *et al.*, 2014, 2015; Yashiro *et al.*, 2016; Chen *et al.*, 2020,  
587 2021; Ji *et al.*, 2020). Gemmatimonadota and Bacillota (formerly Firmicutes) are further phyla that are  
588 commonly present in alpine grasslands, such as in the Tibetan Plateau (Jiang *et al.*, 2021). Studies  
589 specifically addressing archaeal communities in grasslands are still lacking. However, existing work  
590 suggests that Thaumarchaeota (Nitrosphaeria), Nanoarchaeota (Woesearchaeota), Crenarchaeota  
591 (Bathyarchaeota, Thermoprotei), and Euryarchaeota (Thermoplasmata, Methanobacteria) represent the  
592 most prevalent archaeal phyla (Malard *et al.*, 2022). However, ongoing changes in microbial taxonomy, for  
593



594 archaea (and bacteria), facilitated by the widespread availability of genome sequences that led to the  
595 development of comprehensive sequence-based taxonomies like the Genome Taxonomy Database (GTDB)  
596 (Parks *et al.*, 2018) should be considered. Besides, the coverage of archaea can be less than 25% by using  
597 universal primers for 16S metabarcoding (Bahram *et al.*, 2019) and selective and specific detection of  
598 archaea has been rarely done so far and is thus urgently needed. The dominance of Actinobacteriota and  
599 Acidobacteriota and especially of ammonium-oxidising archaea is due to their adaptation to the N- and P-  
600 limited conditions typical for alpine grassland soils or higher elevation soils (Liu *et al.*, 2017; Ma *et al.*,  
601 2019; Praeg *et al.*, 2019).

602 Wang *et al.* (2015) reported no clear trend across a transect spanning 3,106 to 4,479 m on Mount Shegyala  
603 (Transhimalaya), Tibetan Plateau in the abundances of bacteria and archaea; however, they found that the  
604 ratio of bacterial to archaeal gene copy numbers (as a function of abundances) decreased with increasing  
605 elevation, highlighting a switch in favour of archaea. Liang *et al.* (2023) compared variations in taxonomic  
606 and functional (N cycle) dis/similarity of bacteria across the Tibetan plateau and found that both were more  
607 driven by soil abiotic characteristics than vegetation, but with different environmental drivers prevailing  
608 for each. Lazzaro *et al.* (2015) observed the lowest bacterial and fungal abundances at the highest site of an  
609 elevational transect in the Swiss Uri Alps (1,930–2,519 m, European Alps). Similar to findings for  
610 phylogenetic marker genes, functional gene abundance and diversity were shown to vary with elevation in  
611 these studies. Yang *et al.* (2014), in turn, studied the functional diversity at four sites along an elevational  
612 gradient in the Qilian Mountains (Tibetan Plateau). Abundance of the Rubisco (ribulose-1,5-bisphosphate  
613 carboxylase/oxygenase, involved in CO<sub>2</sub>-fixation) gene was lower at the lowest site compared to the other  
614 sites, which might indicate lower CO<sub>2</sub>-fixation activities (Yang *et al.*, 2014; Guo *et al.*, 2015). A succession  
615 of the functional genetic potential has also been demonstrated in Swiss glacier forefields (Feng *et al.*, 2023).

616 Given that the majority (approximately 99%) is not cultivable, high-throughput sequencing (HTS) has  
617 become a powerful tool for assessing and comparing the diversity of prokaryotes, and metagenome  
618 assembled genomes increasingly help to describe the uncultivable majority (Hug *et al.*, 2016). In alpine  
619 systems, the composition, distribution, and structure of microbial communities depend on a number of  
620 environmental factors such as temperature, precipitation, and other climatic variables such as moisture and  
621 snow cover duration (Malard *et al.*, 2022), substrate and nutrient availability, biotic interactions, slope  
622 aspect (Adamczyk *et al.*, 2019), as well as soil physicochemical and vegetation properties (Shen *et al.*,  
623 2015; Donhauser & Frey, 2018; Adamczyk *et al.*, 2019; Praeg *et al.*, 2019, 2020; Liang *et al.*, 2023).

624 While temperature and precipitation typically have a direct effect on microbial communities, the effects of  
625 soil and vegetation properties are likely indirect and depend on climatic variables as well as biological and  
626 chemical feedback. Yet, the establishment of plants has been identified as an important driver of prokaryotic  
627 community structure during early succession (Rime *et al.*, 2015; Wojcik *et al.*, 2020). Overall, edaphic  
628 factors such as soil pH, organic matter content, water, and available P concentrations (Yashiro *et al.*, 2016;

629 Bueno de Mesquita *et al.*, 2020) remain the main determinants of bacterial and archaeal richness, diversity,  
630 and community composition. Soil transplantation experiments to study the changes in the taxonomic and  
631 functional gene structures of microbial communities with warming (Zumsteg *et al.*, 2013a; Rui *et al.*, 2015)  
632 confirm field observations. In these studies, changes in the structure of the community were attributed to  
633 temperature, moisture, soil properties, and vegetation parameters. By condensing information on  
634 community composition to microbial richness and diversity indices, it was shown that bacterial richness  
635 decreased with increasing elevation (Shen *et al.*, 2015; Adamczyk *et al.*, 2019; Praeg *et al.*, 2019), whereas  
636 for archaea, Singh *et al.* (2012) documented a peak in alpha-diversity at mid-elevations along a 1,000–3,760  
637 m gradient on Mount Fuji (Kantō Mountains), Japan. In glacier forefield soils, microbial community  
638 composition was reported to shift in response to increasing C content in soils, decreasing soil pH, and plant  
639 establishment (Zumsteg *et al.*, 2012). Temperature further affects microbial communities when it reaches  
640 extremes (>25 °C) and passes a tipping point where microorganisms react to further temperature increase  
641 with pronounced non-linear responses in community-level growth rates, changes in the temperature  
642 sensitivity of bacterial growth (Q10), and alterations in community structure (Donhauser *et al.*, 2020,  
643 2021). While fungal communities are tightly associated with plants (see Section V.2), bacterial and archaeal  
644 communities are also influenced by other prokaryote communities (Malard *et al.*, 2022). Soil functions and  
645 processes are driven by microbial interactions, and the study of network interactions among bacterial,  
646 archaeal, and fungal microbiota is gaining interest. In alpine grasslands, soil pH was found to be a key  
647 driver for predicting network-level topological features of soil microbial co-occurrence networks; with  
648 increasing soil pH, associations between microorganisms were enhanced and networks became more stable  
649 (Chen *et al.*, 2021).

650 Overall, central gaps in knowledge about prokaryotic diversity in alpine soil exist, firstly, in a  
651 geographical context. Considering the data from Fig. 4, it is obvious that the global distribution of microbial  
652 studies is heterogeneous. Secondly, a deficit we observe is the lack of knowledge about the activity and  
653 ecological functions of prokaryotes in situ. While molecular data provide information about phylogeny,  
654 conclusions about the function of specific clades are often drawn from few cultured isolates which may not  
655 be representative for the entire group (e.g. Verrucomicrobiota). Furthermore, there is a growing need to  
656 increasingly take into account the complex interactions among microorganisms themselves, as well as their  
657 relationships with plants and soil organisms, when investigating and evaluating microbial diversity.

658

## 659 (2) Fungi

660 Fungi comprise a large ecologically heterogenous group of microorganisms (Stajich *et al.*, 2009), of  
661 which only 2–6% of the estimated 1.5–12 million species have been formally described (Taylor *et al.*, 2014;  
662 Hawksworth & Lücking, 2017; Bhunjun *et al.*, 2022). Functionally, fungi range from ecosystem recyclers,  
663 as the main saprotrophic decomposers of (recalcitrant) organic materials (Baldrian & Valášková, 2008;

664 Finlay & Thorn, 2019), to those forming a great diversity of symbiotic associations with plants and animals  
665 (Mueller & Gerardo, 2002; Crowther, Boddy & Hefin Jones, 2012; Genre *et al.*, 2020). It is this  
666 multifunctionality that makes fungi essential components of soil biodiversity in all terrestrial habitats  
667 (Wagg *et al.*, 2014), including high alpine ecosystems.

668 To date, much of what is known concerning alpine soil fungal communities comes from European and  
669 North American studies of the macroscopic reproductive structures (the sporocarps) produced by fungi.  
670 Studies include taxonomic works (Horak, 1993; Cripps, Larsson & Horak, 2010), community and  
671 biogeographic studies (Senn-Irlet, 1988, 1993; Ronikier, 2008), and ecological investigations (Graf, 1994).  
672 These studies have identified a rich diversity of saprotrophic and plant associated symbionts, many of which  
673 appear to be restricted to alpine and arctic environments (Cripps *et al.*, 2019).

674 There are comparably few metabarcoding studies that have included analyses of whole fungal  
675 communities in alpine soils, although elevational gradient studies often comprise samples from vegetation  
676 neighbouring high-elevation treelines, including alpine heaths (e.g. Tonjer *et al.*, 2021). Alpine grassland  
677 fungal communities have been investigated using metabarcoding approaches in China (Yang *et al.*, 2017;  
678 Jiang *et al.*, 2018; Zhang *et al.*, 2020; Zhang & Fu, 2021) and Central Europe (e.g. Pellissier *et al.*, 2014;  
679 Praeg *et al.*, 2019), regions which comprise 79% of the fungal diversity studies found (Fig. 4). These studies  
680 demonstrate that different functional groups show a range of responses to changes in elevation, temperature,  
681 N addition, and grazing management. In the European Alps, fungi are locally diverse (Brunner *et al.*, 2017;  
682 Adamczyk *et al.*, 2019; Praeg *et al.*, 2019; Arraiano-Castilho *et al.*, 2021), similar to other alpine regions  
683 (Bjorbækmo *et al.*, 2010; Perez-Mon, Frey & Frossard, 2020; R  thi *et al.*, 2020). In alpine grassland, soil  
684 fungal communities are primarily composed of Ascomycota and Basidiomycota, but also comprise large  
685 proportions of unidentified fungi (Pellissier *et al.*, 2014; Malard & Pearce, 2018; Praeg *et al.*, 2020).  
686 Within these phyla, Agaricomycetes (Basidiomycota), Archaeorhizomycetes (Ascomycota),  
687 Sordariomycetes (Ascomycota) and Leotiomycetes (Ascomycota) are the most abundant classes of fungi  
688 in grasslands (Pellissier *et al.*, 2014; Pinto-Figueroa *et al.*, 2019). Agaricomycetes are commonly  
689 saprotrophic (decomposers) and actively participate in the decomposition of organic matter (Ludley &  
690 Robinson, 2008; Edwards & Zak, 2010), especially in cold and dry environments (Ludley & Robinson,  
691 2008). Sordariomycetes and Leotiomycetes are ecologically diverse and include pathogens of either plants  
692 and animals, mycorrhiza and plant endophytes, as well as saprotrophs (Maharachchikumbura *et al.*, 2016;  
693 Johnston *et al.*, 2019). Finally, the Archaeorhizomycetes are a widely distributed and abundant class of  
694 terrestrial fungi, yet, their role in the ecosystem is still debated (Rosling, Timling & Taylor, 2013;  
695 Pinto-Figueroa *et al.*, 2019) and their detection is hampered by using the ITS2 region instead of the 18S  
696 rRNA gene (Tonjer *et al.*, 2021). Archaeorhizomycetes are believed to be associated with plant roots, but  
697 experiments suggest they are neither mycorrhizal nor pathogenic (Rosling *et al.*, 2013).

698 Fungal community composition has been intensively studied in glacier forefields where it was shown  
699 that the active fungal community composition changes according to soil developmental stages (Zumsteg *et*  
700 *al.*, 2012, 2013b; Rime *et al.*, 2015; Sannino *et al.*, 2020). The diversity of fungi was surprisingly high in  
701 barren ground closest to the glacier tongue and was similar to older vegetated soils (Rime *et al.*, 2015;  
702 Dresch *et al.*, 2019). Glacier ice is considered as a fungal inoculum source for the earliest ice-related barren  
703 ground and for later plant-covered soil (Rime *et al.*, 2016a). Besides the glacier environment, permafrost  
704 soils also provide living space for numerous fungi from the prehistoric era (Frey *et al.*, 2016; Luláková *et*  
705 *al.*, 2019; Pontes *et al.*, 2020; Frey, 2021). European permafrost soils are dominated by lichenised fungi  
706 and basidiomycetous *Rhodotorula*, including the genera *Naganishia*, *Mrakia*, or *Leucosporidium* (Frey *et*  
707 *al.*, 2016; Adamczyk *et al.*, 2021; Sannino *et al.*, 2021).

708 Historically, below-ground studies of alpine fungi have focused on ectomycorrhizal (EM) and arbuscular  
709 mycorrhizal fungi as well as root associated symbionts of plants. However, there are very few studies on  
710 fungal symbionts associated with ericaceous plants, despite the importance of heath vegetation in alpine  
711 systems (Kivlin *et al.*, 2017). EM fungi are nevertheless essential for establishment and habitat colonisation  
712 by alpine plants such as willows (Nara & Hogetsu, 2004). EM fungi have been examined on a range of  
713 hosts, using combinations of linking sporocarps to associated EM tips (*Salix herbacea* L., Graf & Brunner,  
714 1996) or selection of EM tips followed by molecular identification (*Dryas* sp. and *Salix* sp. (Kernaghan &  
715 Harper, 2001); *Arctostaphylos uva-ursi* (L.) SPRENG. (Krpata *et al.*, 2007); *Bistorta vivipara* (L.)  
716 DELARBRE (Thoen *et al.*, 2019)). Gao & Yang (2016) used a cloning approach to examine mycorrhizal  
717 fungi on herbaceous plant roots in alpine meadows in Southwestern China. However, metabarcoding  
718 studies have provided more comprehensive assessments of root associated fungi on particular host species,  
719 including *Arctostaphylos* sp. (Hesling & Taylor, 2013), *Dryas* sp. (Bjorbækmo *et al.*, 2010), *Carex*  
720 *myosuroides* VILL. (Mühlmann & Peintner, 2008), *Bistorta vivipara* (Mühlmann, Bacher & Peintner,  
721 2008), *Salix* spp. (Ryberg, Andreasen & Björk, 2011). The recent barcoding study by Arraiano-Castilho *et*  
722 *al.* (2021) demonstrated that habitat was a stronger determinant than the host plant for EM fungal  
723 distribution in alpine habitats. All of these studies highlight the high diversity of fungal symbionts  
724 supporting alpine plants.

725 Fungi carry out a multitude of functions in ecosystems, and although they interact with many trophic  
726 groups, the major focus has so far been on plant associated symbionts. The importance of fungal/plant  
727 interactions in the development of plant communities has been particularly well investigated at glacial  
728 fronts in alpine zones using metabarcoding studies in Norway (Blaalid *et al.*, 2012), the Central European  
729 Alps (Brunner *et al.*, 2011; Rime *et al.*, 2015), and North America (Jumpponen *et al.*, 2015).

730 Fungal communities in alpine grasslands are primarily affected by edaphic, climatic, and biotic  
731 parameters. Specifically, soil pH, soil organic C, N, P, soil water content and electrical conductivity are  
732 important soil variables, with snow cover duration also exerting an important influence on fungal richness

(Pellissier *et al.*, 2014; Yang *et al.*, 2017; Malard *et al.*, 2022). The importance of microtopography in alpine zones, particularly differences in snow lie, is widely recognised in structuring plant communities (e.g. Carlson *et al.*, 2015), and a number of studies have also shown topography to be an important driver of soil fungal community composition (Zinger *et al.*, 2009, 2011; Frey *et al.*, 2016). However, this importance is confounded by the close vegetation/fungal relationships. Further studies on individual plant species (see Yao *et al.*, 2013) over a range of topographies may provide greater insights into the direct role of soil conditions on structuring communities.

The strong connections and dependencies between above-ground plant and below-ground fungal communities (see Yao *et al.*, 2013; Tonjer *et al.*, 2021) illustrate that climatic and pollutant-induced changes in alpine plant communities (see Steinbauer *et al.*, 2018) will have major impacts on the associated soil fungi. The upwards migration of treelines (Harsch *et al.*, 2009; Bryn & Potthoff, 2018) and expansion of trees and shrubs into formerly grazed areas (Dibari *et al.*, 2020) will, in particular, have significant impacts on both the taxonomic and functional attributes of alpine soil fungal communities. Similarly, the invasion of alien weed species into alpine vegetation, although currently still limited (Alexander *et al.*, 2016), could lead to alterations of the indigenous fungal communities (Johnston & Pickering, 2001). Lastly, plant richness and diversity are key to fungal alpha and beta diversity in alpine grasslands (Pellissier *et al.*, 2014; Yang *et al.*, 2017; Malard *et al.*, 2022). Similarly, elevated nitrogen deposition induces major shifts in soil fungal functional groups (van der Linde *et al.*, 2018; Zhang, Chen & Ruan, 2018). Coupled with these effects of vegetation change and nutrient availability, there are also direct impacts of changing environmental conditions on fungal communities, with both temperature and moisture being strong drivers of community structure at local (Yao *et al.*, 2013), regional (van der Linde *et al.*, 2018), and global scales (Tedersoo *et al.*, 2014).

### (3) Protists

Protists are defined as all eukaryotes that are not plants, metazoans, or fungi (O'Malley, Simpson & Roger, 2013). They form a vast paraphyletic entity spanning the whole eukaryotic tree of life, comprising large, phylogenetically and functionally diverse groups, and are represented mainly by microbial unicellular organisms (Adl *et al.*, 2019; Burki *et al.*, 2020).

Due to their phylogenetic, morphological, and functional diversity, it is difficult to generalise findings on the entire protist community. The total diversity of protists in general is unknown, most species are undescribed, and their distribution and functions are poorly understood. Accordingly, knowledge on soil protists is lagging behind that of many other soil organisms (Geisen *et al.*, 2018; Bonkowski, Dumack & Fiore-Donno, 2019), and this is reflected in the number of studies focusing on protist diversity in alpine soils (Fig. 4, Table S5). Due to the methodological challenges associated with the study of soil microorganisms, many of which cannot be easily grown in the laboratory, the diversity of protists living in

768 oceans and freshwater ecosystems is better documented than that of soil protists. However, high throughput  
769 sequencing studies are revealing that their diversity is highest in soils, partly due to the strong heterogeneity  
770 of the soil environment and diversity of soil types (Singer *et al.*, 2021). Thus, while numerous studies have  
771 explored the diversity of individual protist groups in mountain soils, documentation of this diversity beyond  
772 high throughput sequencing approaches still represents a largely open field of research, as is true for minute  
773 and microscopic soil organisms in general (Decaëns, 2010). While some protist taxa were described in the  
774 European Alps, such as the family Grossglockneriidae (Petz *et al.*, 1986; Foissner, 1999), and *Puytoracia*  
775 *jenswendti* SANTIBÁÑEZ ET AL. 2011, a euglyphid testate amoeba discovered on glaciers in the Andes  
776 (Santibáñez *et al.*, 2011), the true degree of endemism among alpine protist taxa remains to be determined  
777 (Ronikier & Ronikier, 2009).

778 Diversity patterns of soil protists along elevation gradients have primarily been investigated for specific  
779 groups, such as testate amoebae, a group of shelled protists commonly used as models for biogeographic  
780 studies. Along such gradients, contrasting patterns of distribution were observed: a hump-shaped pattern  
781 along the gradient (e.g. Krashevskaya *et al.*, 2007; Krashevskaya, Maraun & Scheu, 2010; Lamentowicz *et al.*,  
782 2013), the lowest diversity at mid-elevations (Tsyganov *et al.*, 2022), decreasing richness, diversity, and  
783 equitability with increasing elevation (Heger *et al.*, 2016), or no response to elevation (Mitchell, Bragazza  
784 & Gerdol, 2004).

785 With the rise of the molecular era, it has become possible to study the response of the whole community,  
786 and Shen *et al.* (2014) showed that an elevational gradient induced little shaping force on protistan  
787 communities, which were more strongly influenced by edaphic factors such as soil pH. These contradictory  
788 patterns reflect the high diversity of protists, but also likely the fact that some groups are poorly recovered,  
789 either due to the fact that primers are not totally universal (e.g. Amoebozoa are typically under-estimated)  
790 or that the barcode used (e.g. V4 region of the SSUrRNA gene) contains insertions (e.g. some common soil  
791 Rhizaria) that make it impossible to use short reads, as in Illumina sequencing (Pawlowski *et al.*, 2012).

792 Protists are paraphyletic and comprise microeukaryotes that are similar in size and shape to yeasts, but  
793 also comprise taxa that are several millimetres in size or even reach several decimetres, such as e.g. slime  
794 moulds. It is therefore not surprising that protists do not necessarily respond uniformly to environmental  
795 gradients. Nonetheless, as in other habitats, the majority of protistan taxa in alpine soils are believed to be  
796 small, motile, and cyst forming bacterivores (Oliverio *et al.*, 2020; Kang *et al.*, 2022). Accordingly, only a  
797 small effect of elevation on alpha and beta diversities of protistan communities can be expected.  
798 Stramenopiles, Alveolates, and Rhizaria (SAR), along with Amoebozoa and Archaeplastida dominate the  
799 protist diversity in alpine grasslands (Seppey *et al.*, 2020). In terms of function, consumers are followed by  
800 parasites and phototrophs (Mazel *et al.*, 2022). The dominance of consumers in mountain open habitat soils  
801 suggests that this functional group could be key in the cycling and turnover of nutrients in this type of  
802 ecosystem (Geisen *et al.*, 2015; Oliverio *et al.*, 2020).

803 As it is known from low-elevation soils, edaphic factors (e.g. soil moisture, C content, and soil pH) and  
804 the local plant community are strongly determining factors of soil protist communities (Oliverio *et al.*,  
805 2020; Aslani *et al.*, 2022). Besides edaphic factors, temperature and slope of mountain systems also drive  
806 protist community assemblages (Seppey *et al.*, 2020; Malard *et al.*, 2022). Likewise, Hu *et al.* (2022)  
807 showed a strong influence of soil moisture and N content as shaping factors of soil protistan communities  
808 at high elevations, while Shen *et al.* (2014) found protist communities to be primarily correlated with soil  
809 pH. Only a few studies have aimed at inventorying protist communities in alpine ecosystems (Hu *et al.*,  
810 2022; Kang *et al.*, 2022). These studies claim that body size determines the assembly of protist  
811 communities, with deterministic factors (e.g. soil acidity, temperature) being more important in protists  
812 than in other microbes. Furthermore, Kang *et al.* (2022) showed that the turnover rates among alpine  
813 environments were lower in protists than in other microorganisms (bacteria and fungi), which they explain  
814 with a higher dispersal rate of motile protists. However, this finding contrasts with floodplains where  
815 protists showed higher spatial patterns while bacteria communities changed primarily seasonally (Fournier  
816 *et al.*, 2020). Borg Dahl *et al.* (2019) highlighted the importance of plant community as a major determinant  
817 of myxomycetes in the European Alps. As such, physicochemical properties and vegetation patterns will  
818 differentially shape protists in alpine forests, shrublands, grasslands, pastures, and high alpine zones. To  
819 test these suggested trends and hypotheses on protist communities, more targeted inventories are needed  
820 across alpine systems. A recent study manipulated precipitation, warming, and nitrogen addition in alpine  
821 habitats, revealing that these global change factors fundamentally alter soil protist communities and their  
822 abundances. In this study, precipitation and nitrogen input caused an increase in protist diversity and  
823 abundance, respectively, while decreased precipitation and warming reduced them (Hu *et al.*, 2022).  
824 Further, it can be expected that changes in bacterial, fungal, but also plant and animal communities will  
825 cascade to protists (Valencia *et al.*, 2018). Therefore, climate change is expected to alter protist  
826 communities in alpine habitats with potential impacts on other components of the soil microbiome and on  
827 soil functions (Mazel *et al.*, 2022).

828 The last decades have revolutionised the perspective on soil protist functional roles, which span the  
829 whole spectrum from predators, primary producers, parasites, decomposers, phototrophs and saprotrophs  
830 (Geisen *et al.*, 2018, 2020). In soils, protists feed on a wide variety of substrates, with heterotrophs  
831 representing the most abundant and diverse functional group (Bonkowski *et al.*, 2019). Soil protists were  
832 first shown to be key bacterial predators that control bacterial abundances and, via the microbial loop, make  
833 nutrients available for plant growth (Clarholm, 1985). However, protist predators occupy different trophic  
834 niches by feeding on other microorganisms like bacteria, fungi, algae, micro-metazoa such as nematodes  
835 and rotifers (Yeates & Foissner, 1995; Gilbert *et al.*, 2000; Jassej *et al.*, 2013; Geisen *et al.*, 2015;  
836 Estermann *et al.*, 2023), and other protists (Seppey *et al.*, 2017; Geisen *et al.*, 2018; Bonkowski *et al.*,

837 2019). Hereby, phagocytosis appears to be the main mechanism for nutrient acquisition (Singer *et al.*,  
838 2021).

839 Bacterivorous taxa may dominate the protist community in many cases (Oliverio *et al.*, 2020; Aslani *et*  
840 *al.*, 2022), but the dominant feeding habits can be expected to match the available resources and especially  
841 the bacteria to fungi ratio, which responds to soil pH (Rousk, Brookes & Bååth, 2009). Hence, fungivores  
842 are likely more common in subalpine (e.g. conifer-dominated forests) and lower alpine (e.g. ericoid heath)  
843 habitats, as perfectly illustrated by the obligate fungivorous grossglocknerid ciliates that were discovered  
844 in the European Alps (Petz *et al.*, 1986; Foissner, 1999).

845 Soil protists, including crop pathogens like *Phytophthora infestans* (MONT.) DE BARY, have a broader  
846 role as parasites, potentially affecting plant or soil animals. However, the diversity and interactions of these  
847 protist parasites remain understudied. Apicomplexa parasites of invertebrates and vertebrates, strongly  
848 dominate soil protist diversity in tropical forests and this dominance is thought to reflect the overall  
849 invertebrate diversity throughout the ecosystem, from soil to canopy (Mahé *et al.*, 2017). In line with this,  
850 a study in the Swiss Alps showed that the diversity of Apicomplexa in various alpine habitats correlated  
851 positively with the diversity of their putative metazoan hosts (Singer *et al.*, 2020). The relative contribution  
852 of parasites to the total protist community compared to other functional groups was, however, shown to  
853 decrease with increasing elevation, likely due to the reduction in host density with elevation (Mazel *et al.*,  
854 2022).

855 Phototrophic protists, like *Chlorella* and *Trebouxia*, are common as symbionts in lichens, but also as  
856 free-living forms at the soil surface (Jassey *et al.*, 2022). However, the abundance of free-living  
857 phototrophic protists (and their predators) is highest in moist (e.g. peatlands) and open (e.g. arid or alpine)  
858 vegetation (Gilbert *et al.*, 1998; Seppey *et al.*, 2017). In arid habitats, including patchy alpine vegetation,  
859 phototrophic protists contribute to the formation of biocrusts, which are major contributors to organic C  
860 and N fixation (Dickson, 2000) and reduce soil erosion (Evans & Johansen, 1999). While soil protists have  
861 long been neglected in soil microbiological studies (Geisen *et al.*, 2020), they now are the focus of an  
862 increasing number of studies as their importance as determinants of plant performance is established  
863 (Bonkowski, 2004; Gao *et al.*, 2019). Thus, protists are now recognised as important elements in soils  
864 ecosystems due to their role in the microbial food web and nutrient cycling (Adl & Gupta, 2006; Geisen *et*  
865 *al.*, 2016) and their contribution to biogeochemical cycles, especially C (Geisen *et al.*, 2020) and silica  
866 (Aoki, Hoshino & Matsubara, 2007).

867



## VI. SOIL INVERTEBRATES

### KEY ASPECTS

- The treeline ecotone harbours a high diversity of soil macro-, meso-, and micro-invertebrates, as species from both forest and grassland ecosystems coexist. At higher elevation, the shallow soils are mainly inhabited by soil meso- and micro-invertebrates.
- Faunal diversity generally decreases with increasing elevation, as climatic and energetic conditions become more challenging. Some taxa reach their upper distribution limits (e.g. earthworms and millipedes in the high alpine zone).
- Essential ecosystem functions are carried out by only a few key taxa (e.g. litter decomposition in the high alpine is mainly carried out by Nematocera larvae and soil meso-invertebrates).
- Soil food webs in high alpine soils are simple, with fewer interactions compared to lowland soils. Omnivorous and opportunistic feeding habits have increased to ensure energy intake.
- Extensive grazing by livestock and wild ungulates can improve conditions for soil fauna by providing nutritious manure and reducing cover of recalcitrant dwarf shrubs.
- We found 205 publications dealing primarily with alpine soil fauna (i.e. 118 for macro-, 52 for meso-, and 35 for micro-invertebrates), mainly from the mountain regions of Central & Southern Europe (42.9%), Central Asia (15.6%), and Australia & New Zealand (13.2%); see Fig. 5 and Table S6.

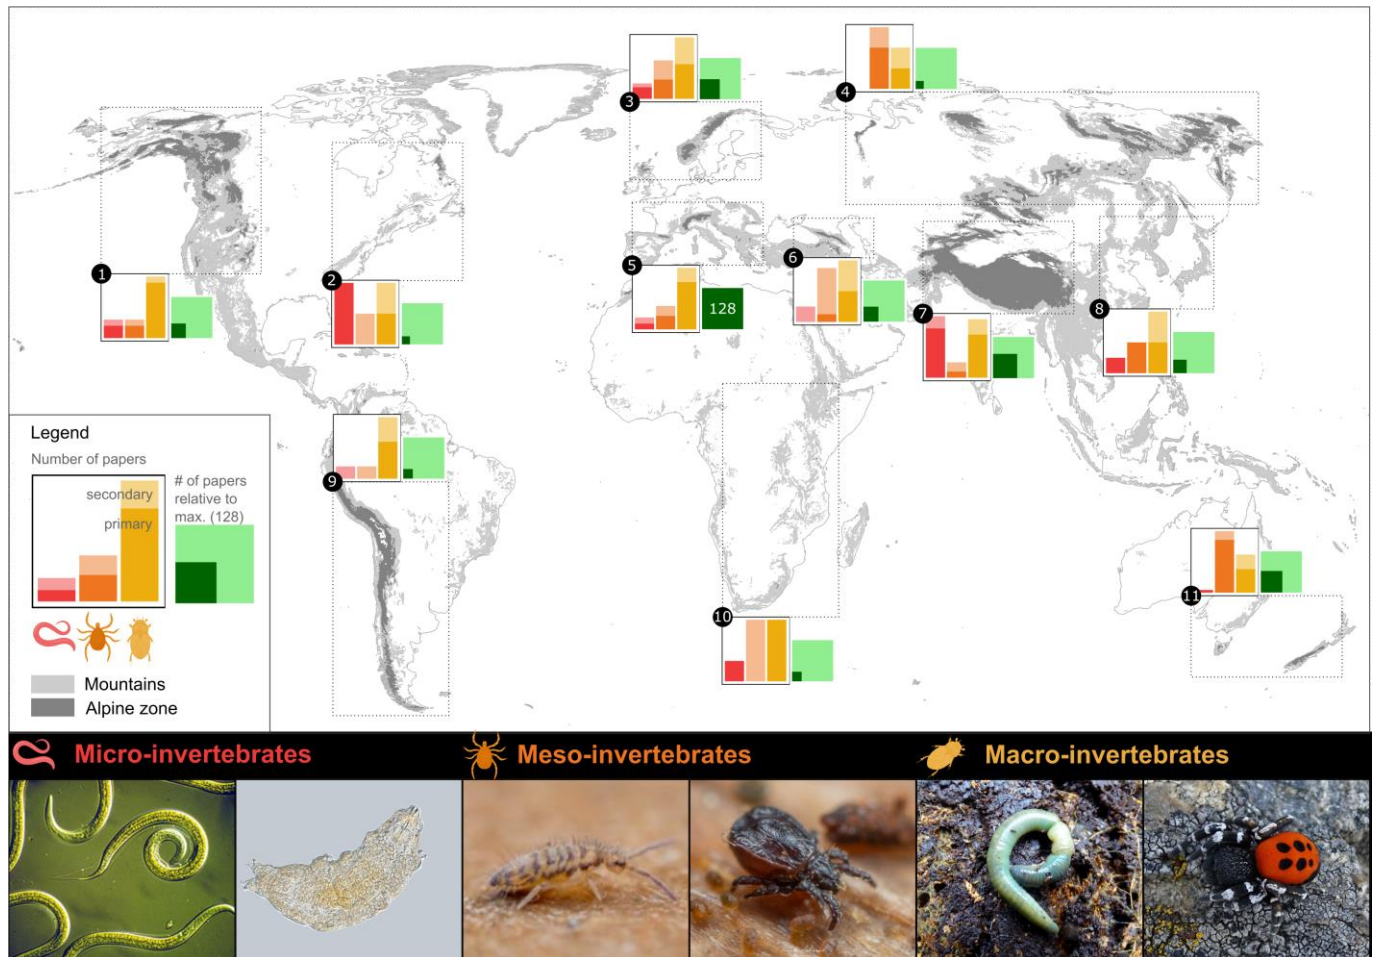

**Fig. 5.** Global map of scientific articles focusing on invertebrates in alpine mountain soils. Number of publications are given per invertebrate group and relative to the maximum of papers found (Central & Southern Europe): the dark-coloured part of the bar represents those papers where the organismic group was likely the primary object, the light-coloured part represents those papers where the organismic group was mentioned, but not as the main subject of the publication. See Appendix S1 for a detailed description of the methods and full list of publication numbers per region and soil organism group. Photos from left to right: Micro-invertebrates: images of Nematoda (credit: CSIRO Entomology), and a Tardigrada *Macrobiotus* sp. (credit: Michala Tůmová) through microscopes; Meso-invertebrates: the Collembola *Entomobrya nivalis* and the Acari *Platynothrus pelifer* (credit: both Frank Ashwood); Macro-invertebrates: the ‘green’ earthworm *Aporecctodea smaragdina* inhabits calcareous mountain soils in the European Alps and Dinaric Alps, male velvet spider *Eresus sandaliatus* found in alpine dry pastures in the Central European Alps (credit: both Michael Steinwandter).

885 In general, soil invertebrates belong to a wide range of taxa. Their diversity is particularly high close to  
 886 the treeline, as representatives of all size classes (micro-, meso-, and macro-invertebrates, (Orgiazzi *et al.*,  
 887 2016) are found and grassland species co-occur with forest species, especially in intertwined dwarf shrub

888 habitats. Macro-invertebrates (taxa with a mean body size > 2 mm, mainly earthworms, spiders, myriapods,  
889 isopods, ants, and insect larvae) decrease in numbers with increasing elevation due to climatic and  
890 topographic factors. Vegetation cover and the amount of soil decrease, particularly limiting soil macro-  
891 invertebrates that require a vegetation cover that produces litter material and/or the physical habitat space  
892 that is provided by mature soils. Meso- (mainly collembolans, mites, and enchytraeids) and micro-  
893 invertebrates (mainly nematodes, rotifers, and tardigrades) can still be abundant in shallow high-elevation  
894 soils even though habitat space and litter inputs from vegetation are reduced.

895 Compared to soil microbiota, data on soil fauna are scarce and often limited to ground-dwelling taxa  
896 (Burton *et al.*, 2022). Soil fauna studies focusing on alpine and high-elevation habitats are especially rare.  
897 Available data pertain primarily to alpine regions in Central & Southern Europe (i.e. 42.9%, Fig. 4 and  
898 Table S6) such as the Central European Alps (e.g. Puntischer, 1980; Meyer & Thaler, 1995; Koch &  
899 Erschbamer, 2010; Gobbi *et al.*, 2020; Seeber *et al.*, 2021), Central Asia (15.6%) such as the Tibetan  
900 Plateau (e.g. Wu, Zhang & Wang, 2015; Devetter *et al.*, 2017), and Australia and New Zealand (13.2%,  
901 e.g. Salmon, 1940; Hammer, Foged & Nørvang, 1966; Houston & Greenslade, 1994; Minor *et al.*, 2016;  
902 Mesibov, 2018; Green & Slatyer, 2020), while alpine regions in the Americas (i.e. Rocky Mountains,  
903 Appalachians, and Andes), Africa (i.e. Drakensberg), and the Caucasus remain understudied (but see  
904 Armstrong & Brand, 2012; Kokhia & Golovatch, 2020). We were able to find only five soil fauna  
905 publications for each of these alpine regions (Table S6, Appendix S1). A similar outcome was found for  
906 the alpine region of Siberia (i.e. North Asia), where information is locally available but mainly published  
907 in Russian and therefore not indexed in the ‘Web of Science’ portal.

908 In alpine environments, large soil fauna is generally sampled by installing pitfall traps (macro-, partially  
909 also meso-invertebrates), by taking soil core samples (all groups), by suction sampling (ground-dwelling  
910 meso-invertebrates), as well as via hand sorting and hand sampling (macro-invertebrates); pitfall traps are  
911 preferably used in higher elevations as soil is getting scarce and shallow. To cope with methodological and  
912 logistical limitations, additional approaches such as soil biodiversity indices (e.g. QBS-ar, Maienza *et al.*,  
913 2022) and DNA metabarcoding (e.g. via environmental DNA (eDNA), Rota *et al.*, 2020) are increasingly  
914 applied also in alpine habitats. Amongst the alpine soil fauna species described to date, some are rarely  
915 found and observations are often based on occasional records. Such observations can even lead to new  
916 discoveries for alpine regions due to the scarcity of research such as the carabid beetle *Orthoglymma*  
917 *wangapeka* LIEBHERR, MARRIS, EMBERSON & SYRETT & ROIG-JUÑENT, 2011 (Liebherr *et al.*, 2011) and the  
918 oribatid mite *Crotonia ramsayi* COLLOFF, 2015 (Colloff, 2015) for New Zealand, the isotomid springtail  
919 *Skadisotoma inpericulosa* GREENSLADE & FJELLBERG, 2015 (Greenslade & Fjellberg, 2015) for Australia,  
920 and *Opetiopalpus sabulosus* MOTSCHULSKY, 1840 (Steinwandter *et al.*, 2019). A high percentage are  
921 regionally endemic or found in restricted geographical areas, as observed in the European Alps (e.g.  
922 Komposch, 2011), in Australasia (Boyer & Giribet, 2009), and in the Drakensberg of Southern Africa

(Armstrong & Brand, 2012). These species are mainly relicts of the last glaciations that survived in nunataks and other refugia offered by highly heterogeneous mountain topography (Brighenti *et al.*, 2021); in subsequent interglacial periods, these alpine invertebrates have expanded extensively (Hill *et al.*, 2009). For Australasian alpine taxa, a deeper phylogeographic structuring was shown compared to European and North American ones, possibly reflecting less intense glaciation and a higher availability of refuges during glaciation events (King *et al.*, 2020). Colonisation processes in high alpine areas can be surmised by observing the colonisation of alpine land when glaciers retract (Koch & Kaufmann, 2010; Hågvar *et al.*, 2020). The first to re-colonise the bare land, which is comparable to quarries, are mostly agile ground-dwelling predators (e.g. carabid beetles, harvestmen, lycosid spiders) depending presumably on windblown animals as food sources, followed by the meso-invertebrates (springtails and oribatid mites) after 30 years. Finally, larger detritivores (millipedes and Nematocera larvae) appear when the soil and the vegetation are more developed (Kaufmann, Fuchs & Gosterxeier, 2002).

### (1) Macro-invertebrates

The diversity of soil macro-invertebrates – often referred to simply as soil macrofauna – is generally lower in high alpine grasslands than in the alpine and subalpine zone and often peaks in ecotone areas (i.e. the transition zones at the treelines and open alpine grasslands; Fontana *et al.*, 2020; Steinwandter & Seeber, 2023). Elevation and vegetation are the primary determinants of alpine soil macro-invertebrate communities (Kooch & Noghre, 2020; Steinwandter *et al.*, 2022; Xie *et al.*, 2022; Lavelle *et al.*, 2022). Earthworms (Lumbricidae), for instance, show a hump-shaped distribution peaking at the treeline ecotone area (Fontana *et al.*, 2020; Gabriac *et al.*, 2023). Earthworm abundance decreases in alpine grasslands (Seeber *et al.*, 2005; Steinwandter *et al.*, 2018), likely because of their limited tolerance to the cold temperatures encountered at higher elevations (Meshcheryakova & Berman, 2014). Additional influencing factors include vegetation attributes such as plant life-forms and host-plant distributions (e.g. Edwards & Arancon, 2022), as well as soil attributes such as pH, clay, and water content. Also, poorly developed soils provide limited habitat space for burrowing species. Yet, abundances and species diversity may increase with the presence of grazing livestock and wild mammals, whose dung represents a readily available food source for all decomposer taxa (Bueno & Jiménez, 2014; Steinwandter *et al.*, 2018; Jászayová *et al.*, 2023).

Millipedes (Diplopoda) are litter-dwellers and therefore mostly found in dwarf shrub-rich grasslands and ecotones above the treeline, where they find the mature and stable soils they prefer as well as more abundant food resources such as litter and organic debris (Onipchenko & Zhakova, 1997; Steinwandter *et al.*, 2018; Gobbi *et al.*, 2020; Kokhia & Golovatch, 2020). Most millipede species reach their upper limit of distribution at the transition between the subalpine and alpine zones and are rare or even completely absent in high alpine habitats. Soil core samples from high elevations generally contain few to no millipede

958 specimens, making estimates of their densities difficult. However, millipedes (and soil invertebrates in  
959 general) are easier and more efficiently detected in high alpine environments by using pitfall traps or hand  
960 sampling and are therefore occasionally found at higher elevations (e.g. *Beronodesmoides* spp.  
961 (Polydesmida: Paradoxosomatidae) up to 4500 m in Nepal (Golovatch, 2015). Millipede species inhabiting  
962 high elevations mainly belong to the orders Polydesmida, Chordeumatida, and Julidae (Beron, 2008, 2016).  
963 In the Central European Alps, species found in higher elevations belong mainly to Chordeumatida, which  
964 are described to be petrophilic with a preference for cold mountain areas and which are active beneath the  
965 snow (Meyer, 1980). These millipedes were found in high numbers at sites up to 3000 m (Steinwandter &  
966 Seeber, 2023), while other myriapods such as centipedes (Chilopoda) were almost absent. Other millipede  
967 species that frequently inhabit European mountain soils and can be found at high elevation include eurytope  
968 millipede species such as *Ommatoiulus sabulosus* (LINNAEUS, 1758) (Julida: Julidae) as well as specialists  
969 such as the endemic *Glomeris transalpina* KOCH C. L., 1836 (Glomerida: Glomeridae); both are known to  
970 inhabit alpine rocky sites and soils even up to 3000 m. However, elevational limits may now change with  
971 ongoing global warming: Gilgado *et al.* (2021) recently described ten millipede species whose elevational  
972 limits in the Swiss Alps have expanded upwards by several 100 metres over the last century.

973 Surface-active and highly mobile and agile predators, such as spiders, harvestmen, and some beetle  
974 families are abundant representatives of the high alpine soil fauna (Kaufmann *et al.*, 2002; Hågvar *et al.*,  
975 2020; Gilgado *et al.*, 2022) and seem not to depend on mature soils but rather on available prey. Numerous  
976 studies have investigated the diversity of beetles in mountain soils, but the majority focus on a few widely  
977 distributed and well-known families (e.g. Carabidae, Staphylinidae, and Scarabaeidae). The density,  
978 diversity, and distribution of predatory beetles are affected by a wide range of factors such as biotic  
979 interactions, vegetation (Negro *et al.*, 2010; Yu *et al.*, 2013), abiotic factors such as temperature and  
980 moisture (Yu *et al.*, 2013), historical factors such as climatic variability and topographical changes, and  
981 human activities (Larsen, 2012; Brandmayr & Pizzolotto, 2016). Further, topographic isolation may boost  
982 beetle diversity as it was found by Armstrong & Brand (2012) on isolated peaks (i.e. > 3000 m) of the  
983 Drakensberg (Afro-alpine Region), where leaf- (Chrysomelidae), ground- (Carabidae), and sap beetles  
984 (Nitidulidae) dominated.

985 In the case of ants (Hymenoptera: Formicidae), as with other soil fauna, their presence and abundance  
986 decrease with increasing elevation in alpine settings, where severe filtering can be detected both on  
987 taxonomic as well as functional and phylogenetic diversity (Glaser, 2006; Machac *et al.*, 2011; Chaladze,  
988 2012; Reymond *et al.*, 2013; Bishop *et al.*, 2014). Elevational limits to occurrence are related to the ability  
989 of ants to cope with low temperatures (Bishop *et al.*, 2017). However, while ant colonies tend to occur in  
990 the lower alpine area and become increasingly absent in high alpine areas, some individuals (mainly  
991 specimens from the winged 'alates' caste) may be transported upwards by wind. Overall, ant diversity peaks  
992 at mid-elevation and decreases constantly – and often linearly – with increasing elevation (Subedi & Budha,

993 2020). Similar results were found for the Maloti-Drakensberg in Southern Africa by Bishop *et al.*, (2014)  
994 who attributed the spatial and temporal differences primarily to temperature. In the European Alps, most  
995 ant species occurring in the alpine habitat are also present in the higher montane forest belt (Glaser, 2006),  
996 and a higher species diversity was recorded in the treeline ecotone (Guariento & Fiedler, 2021).  
997 Interestingly, a high number of social parasitic ant species are reported from alpine habitats without a clear  
998 explanation so far, except that the harsher environment might positively select for such life history traits  
999 (Dunn *et al.*, 2009; Schifani *et al.*, 2021). In alpine grasslands, the effect of ants on soils is mostly related  
1000 to nest construction, since most taxa build their nests in the soil, causing soil turnover as well as nutrient  
1001 accumulation and influencing the vegetation (Wang *et al.*, 2017; Zhao *et al.*, 2020). Ants strategically  
1002 establish their nests beneath rocks, leveraging the warmth absorption and insulation (McCaffrey & Galen,  
1003 2011). Therefore, the rock features (e.g. distribution, shape) represent an important factor for the  
1004 establishment of ant nests. Studies investigating the functional role of ants indicate higher trophic levels in  
1005 the alpine environment (Spotti *et al.*, 2015; Guariento, Martini & Fiedler, 2018), even suggesting  
1006 intraspecific dietary shifts (Guariento, Wanek & Fiedler, 2021).

1007 Other insect taxa such as larvae of lower flies (Nematocera) increase in numbers at higher elevations.  
1008 They can – at least in parts – carry out crucial ecological functions such as litter decomposition and  
1009 bioturbation which are usually provided by detritivores such as millipedes and earthworms (Meyer &  
1010 Thaler, 1995; Kitz *et al.*, 2015).

## 1012 (2) Meso-invertebrates

1013 Soil meso-invertebrate communities – often referred to simply as soil mesofauna – are mainly composed  
1014 of springtails (Collembola), mites (Acari), other small arthropods, and potworms (Enchytraeidae) (Potapov  
1015 *et al.*, 2022). Of these, springtails are the most widespread and abundant invertebrates, occurring in almost  
1016 all terrestrial ecosystems (Hopkin, 1997; Deharveng, 2004). They play essential roles in many soil  
1017 ecosystem processes, such as C and N cycling, soil microstructure formation, and plant litter decomposition.  
1018 Collembola density and diversity vary significantly with environmental factors and plant community  
1019 composition, and in the shallow alpine soils they inhabit mostly the litter and upper soil layers (Seeber *et*  
1020 *al.*, 2021; Xie *et al.*, 2022).

1021 In general, the composition and abundance of meso-invertebrate communities in soil are dependent on  
1022 elevation (Striganova & Rybalov, 2008; Jiang, Yin & Wang, 2015; Khabir *et al.*, 2015; Schatz, 2017;  
1023 Winkler *et al.*, 2018), soil properties (van der Merwe *et al.*, 2020), the identity of plant species and the  
1024 variability of vegetation communities (Eo *et al.*, 2016; Xie *et al.*, 2022), all of which can lead to a high  
1025 spatial heterogeneity with many local microhabitats. Furthermore, factors related to climate change, such  
1026 as temperature (Harte, Rawa & Price, 1996; Alatalo *et al.*, 2017) and reduced soil water availability  
1027 (Sylvain *et al.*, 2014), as well as (anthropogenic) disturbances may also affect soil mesofauna diversity and

1028 communities. Habitat management (Kooch, Shah Piri & Dianati Tilaki, 2021), tourist activity (Meyer,  
1029 1993; Kopeszki & Trockner, 1994), cattle trampling and grazing (Hauck *et al.*, 2014; Risch *et al.*, 2015),  
1030 fire (Driessen & Kirkpatrick, 2017), soil erosion (Meyer, 1993; van der Merwe *et al.*, 2020), and pollution  
1031 (Rusek, 1993; Visioli *et al.*, 2019) all affect the meso-invertebrates living in alpine grasslands, suggesting  
1032 that environmental filtering is the predominant process shaping soil meso-invertebrate communities (Visioli  
1033 *et al.*, 2019).

1034 In the nival zone, the soil fauna community is composed almost exclusively of meso-invertebrates –  
1035 springtails, mites, and by region additionally by predatory false scorpions (Pseudoscorpiones), e.g. in  
1036 European Alps, Carpathian Mountains. Mesofauna distribution is scattered and limited to favourable  
1037 refugia such as congregations of detritus or cushion plants (Meyer & Thaler, 1995). Some specialist taxa  
1038 are adapted to snowbeds, which can persist for most of the year (Seeber *et al.*, 2021). These species rely on  
1039 aeolian food sources (i.e. wind-blown debris) or prey on small animals searching for this food; the different  
1040 taxa are active at different times of the day as extreme environmental conditions restrict their activity  
1041 (Mann, Edwards & Gara, 1980).

### 1042 1043 **(3) Micro-invertebrates**

1044 Soil micro-invertebrates (taxa < 0.1 mm in size) – simply referred to as soil microfauna – mainly  
1045 comprise roundworms (Nematoda), rotifers (Rotifera), and water bears (Tardigrada). Little research on  
1046 these tiny soil invertebrates has been conducted in alpine regions (Devetter *et al.*, 2017), however, a global  
1047 distribution map of nematodes revealed a positive relationship between organic C content in mountain soils  
1048 and abundance of nematodes (van den Hoogen *et al.*, 2019). Micro-invertebrates are generally favoured in  
1049 fertile soils with high contents of N, P, and organic matter (Devetter *et al.*, 2017), and are easily affected  
1050 by disturbances such as soil degradation and shrub encroachment after abandonment (Hu *et al.*, 2017; Wu  
1051 *et al.*, 2017; Wang *et al.*, 2018)(Hu *et al.*, 2017; Wu *et al.*, 2017; Wang *et al.*, 2018). Recently, Poraziska  
1052 *et al.* (2021) showed that soil nematodes expand their distribution ranges with elevation by following  
1053 expanding plant species, and as plant communities become more complex and diverse even at higher  
1054 elevations, a more diverse nematode community may increasingly contribute to C and N sequestration.  
1055 Further, Li *et al.* (2023) found that soil nematodes – which are generally water-bound – respond positively  
1056 to higher precipitation and soil water content in alpine grasslands of the Tibetan Plateau, with higher  
1057 trophic-level nematodes (i.e. omnivores, carnivores) showing stronger effects than lower trophic-level  
1058 nematodes (i.e. bacterivores, fungivores).

### 1059 1060 **(4) Adaptation strategies of fauna to mountain soils**

1061 The conditions in high alpine areas can be hostile to animal life, but soil taxa have adapted over a long  
1062 time and have developed strategies to cope with the harsh and varying climate. Many taxa have black, dark

1063 brown, or dark grey body colour (e.g. beetles, spiders) (Armstrong & Brand, 2012), an adaptation that  
1064 allows larger cold-blooded mountain animals to better absorb sunlight and therefore energy. Appendages  
1065 and legs are often shorter than those of the same species and groups living in lower habitats. Wing size is  
1066 also often reduced (i.e. a higher degree of brachyptery or winglessness), for example in carabid  
1067 communities of high alpine habitats (Pizzolotto, 2016). Due to the long duration of snow cover, alpine soil  
1068 invertebrates show increased cold resistance, behavioural thermoregulation, and actively seek thermally-  
1069 buffered microhabitats (Dillon *et al.*, 2006; Schoville *et al.*, 2015; Buckley *et al.*, 2015). Yet, individuals  
1070 often search for food on the snow surface or in more favourable locations that can only be reached by  
1071 crossing snowfields, thus, the risk of hypothermia is often high.

1072 Beside physiological adaptations, high alpine soil fauna typically show more generalist diets (i.e.  
1073 omnivory) due to the low availability of food resources. Predation seems to be driven by the presence and  
1074 abundance of a given prey. For example, in extremely high-elevation environments such as glacier  
1075 forefields, carabid beetles of *Nebria* spp. and lycosid spiders of *Pardosa* spp. prey on springtails (König,  
1076 Kaufmann & Scheu, 2011; Sint *et al.*, 2019; Hågvar *et al.*, 2020), which are specifically tied to the  
1077 geomorphology of these habitats (i.e. rough stones that can trap food and prevent flushing, Buda *et al.*,  
1078 2020). Food limitation in such environments results in simpler and more reduced food webs compared to  
1079 lowland habitats (König *et al.*, 2011; Raso *et al.*, 2014; Steinwandter *et al.*, 2018). Species which are  
1080 usually saprotrophic also include animal food sources (e.g. exuvia, carcasses, tissue parts) in their diet and  
1081 may feed on living animal tissue as plant-based litter is rare or even absent. For predators such as carabid  
1082 beetles living in barren high alpine soils with limited number of prey (i.e. mainly springtails), increased  
1083 intraguild and intraspecific predation has been observed to sustain nutritional needs (Raso *et al.*, 2014).  
1084 Additional food can also come from airborne sources, including flying and wind-carried insects, as well as  
1085 detritus (Růžička & Zacharda, 1994; Hågvar *et al.*, 2020). However, specialised predation to efficiently  
1086 intercept the most abundant prey has also evolved, as in the case of the carabid genera *Leistus* and  
1087 *Notiophilus*, which trap springtails with their antennae setae (i.e. setal traps, Bauer, 1985). Additional  
1088 adaptations pertain to the invertebrates' life history. For example, the life cycle of millipedes and other soil  
1089 invertebrates can be interrupted and postponed to spring of the following year if it cannot be completed  
1090 within a single season (Meyer, 1985; Sømme & Block, 1991; Valle *et al.*, 2020). Also, parthenogenesis is  
1091 widespread, especially among the soil meso-invertebrates (e.g. springtails and mites), allowing them to  
1092 thrive when the conditions are more variable (Pan *et al.*, 2023).



## VII. KNOWLEDGE GAPS AND RESEARCH OPPORTUNITIES

A number of recent papers discuss data, knowledge, and policy gaps in soil biodiversity science at a global scale (Guerra *et al.*, 2020, 2021, 2022), but there has been no such contribution for alpine soils so far. This is the case despite the critical importance of healthy mountain soils for human safety and wellbeing and for the global provisioning of essential goods and services such as clean water. In this section, we address this gap and identify three main fields/topics for future soil biodiversity research and policymaking in mountains. We put a special emphasis on mountain characteristics that are key but also challenging for soil biodiversity research in mountains (see Klein *et al.*, 2019). These include the typical elevational gradients encountered in mountains, their remoteness and simultaneous exposure to global change, and their global distribution.

### (1) Opportunity 1: Increase and improve mountain soil biodiversity data

Premise: In line with recent global analyses, our synthesis indicates that data on mountain soil biodiversity is generally sparse and biased (Figs. 1 and 3–5) towards specific geographic regions (Central Asia and Central Europe) and taxonomic groups (mostly soil microbiota). In particular, it points to limited data for groups such as soil invertebrates that are more exhaustively described in other biomes (Geisen *et al.*, 2017, 2018; Eisenhauer *et al.*, 2022). This lack of data on species diversity and occurrence in mountain soils constitutes an important gap in our knowledge of biodiversity on Earth. It causes species to be overlooked by science, conservation, policy, and advocacy, even if they are possibly on the verge of extinction and/or play critical roles in supporting ecosystem functions. This is particularly important in soils, where interactions among taxa are ubiquitous and essential for species persistence and ecological functions (e.g. Bardgett & van der Putten, 2014). As soil organisms and keystone species disappear, the functioning of entire ecosystems could be disrupted, threatening humanity at large (Jousset *et al.*, 2017; Banerjee, Schlaeppli & van der Heijden, 2018; Chen *et al.*, 2020; Guerra *et al.*, 2021).

The observed lack of species data also comes with the risk of overlooking invasive species that could alter soil properties and represent a threat to native species (e.g. the earthworm *Amyntas agrestis* (GOTO & HATAI, 1899) in the Great Smoky Mountains (Appalachian Mountains, Snyder, Callahan & Hendrix, 2011)). In addition to the absence of information on the mere existence of many species, limited (long-term) data on trends in populations, species distributions, and community composition further jeopardise the ability of science and policy to detect, interpret, and ultimately address or prevent effects of global change on mountain soils and ecosystem functions. It equally hinders the detection of potentially unexpected effects of nature conservation. Whereas species distribution and range expansions are increasingly better documented in particular for plants (e.g. Rumpf *et al.*, 2018; Staude *et al.*, 2022), such information hardly exists for soil biota, and temporal variation in diversity along elevational, topographical or other ecological gradients is largely unknown (e.g. see Seppey *et al.*, 2020 for soil protists). Furthermore,

1130 limitations in spatial representativeness and coverage of taxonomic groups in soil biodiversity data  
1131 constrain our capacity to understand mountain soil systems and their response to change based on  
1132 comparative analyses at multiple biogeographic scales. Given the worldwide occurrence of mountains, the  
1133 differences between mountain ranges, and the existence of differences even between the south- and north-  
1134 facing slopes of individual mountains, such comparative approaches are both important and particularly  
1135 interesting. Importantly, these gaps in knowledge also hamper the establishment, design, and prioritisation  
1136 of monitoring efforts as well as the integration of soil biodiversity in “Red Lists”.

1137 Directions: We support previous calls for a better geographic and taxonomic coverage in soil biodiversity  
1138 research and for prioritising long-term monitoring of life in mountain soils at national (Guerra *et al.*, 2020,  
1139 2021; Eisenhauer *et al.*, 2022) and global (Maestre & Eisenhauer, 2019) scales. Multiple options exist for  
1140 increasing and improving mountain soil biodiversity data (see also Hochkirch *et al.*, 2021). One resides in  
1141 molecular approaches such as DNA or RNA barcoding and the use of metagenomics and  
1142 metatranscriptomics. These methods offer great opportunities, in particular for the detection and  
1143 identification of microbiota as well as for attributing them to threat categories (e.g. Guerra *et al.*, 2021).  
1144 While in use for bacteria and fungi already (see Section V), they could also deliver much needed  
1145 information for other soil organisms in mountains. Another option to increase species discovery rates  
1146 resides in the identification of mountain locations where unknown taxa are most likely to be encountered  
1147 (e.g. Delgado-Baquerizo, 2019; Verdon *et al.*, 2023). Such an effort is particularly interesting in remote  
1148 locations, where *in situ* sampling is particularly challenging. Similar approaches for the identification of  
1149 sampling locations based on the intersection of spatial datasets of mountain extents (Snethlage *et al.*, 2022),  
1150 key environmental variables, and abiotic factors (e.g. soil temperature and type) might also serve the  
1151 prioritisation of appropriate sites for long-term monitoring of mountain soil species and communities along  
1152 elevational gradients. Furthermore, as suggested by van der Putten *et al.* (2023), an alternative to identifying  
1153 species is to qualify soil biota based on traits and thereby more readily understand what ecosystem functions  
1154 are likely to be lost as species go extinct. A trait-based approach could be particularly interesting in  
1155 mountains where harsh environmental conditions, including extreme temperature (gradients) and  
1156 biophysical stressors such as recurrent avalanches, are likely determining unique sets of traits.

1157  
1158 **(2) Opportunity 2: Increase and improve information on the environmental determinants of**  
1159 **biodiversity in mountain soils, the drivers of change in mountain soil biodiversity, and the**  
1160 **consequences of these changes**

1161 Premise: The occurrence and diversity of life forms in mountain soils are strongly determined by  
1162 environmental factors, including temperature, snow cover, precipitation, humidity and wind, as well as  
1163 factors such as soil properties (e.g. pH, organic matter quantity and quality, parental material composition).  
1164 Accordingly, as these factors are changing in response to changes in climate, land-use, and other drivers

1165 such as pollution, soil communities are expected to experience novel life conditions influencing their  
1166 distribution, dynamics, survival potential, and functions (e.g. Feng *et al.*, 2023). In that context, glacial  
1167 forefields represent newly forming ecosystems of particular interest and need of protection (Bosson *et al.*,  
1168 2023; Tollefson, 2023). Additionally, (expected) change in the elevation range limits, distribution, and  
1169 community composition of vascular plants in response to global change are likely to have additional  
1170 consequences on soil organisms, whose ecology and life histories are tightly associated with plants.  
1171 Furthermore, as environmental factors such as temperature and soil moisture determine not only the  
1172 occurrence and diversity of organisms but also specific biochemical cycles such as the production of  
1173 methane (e.g. Hofmann, Reitschuler & Illmer, 2013), feedback loops are likely to magnify effects of  
1174 climate and land-use change and thereby exacerbate the exposure of soil biota to unprecedented and extreme  
1175 environments. Such feedback loops or cascading effects are further exacerbated by the reciprocal effects of  
1176 organisms on their environment (e.g. pedogenic effects of cryptogams, Musielok *et al.*, 2021).

1177 Directions: Identifying the impacts of global change and anthropogenic activities on mountain soil  
1178 biodiversity is essential to safeguard soil functions, services, and health (Arora, 2023). In that context,  
1179 considerable improvements are needed in the spatial resolution, temporal coverage, and accuracy of  
1180 information on fundamental variables such as soil type, temperature, moisture, pH, and precipitation in  
1181 mountains (e.g. Randin *et al.*, 2020). We also join others (e.g. Bouaicha *et al.*, 2022; Eisenhauer *et al.*,  
1182 2022) in calling for improved data and remote-sensing products on less common drivers of soil biodiversity,  
1183 such as pollution by microplastics, chemicals, and heavy metals. Such data are particularly important in  
1184 mountain regions, where global atmospheric transport of micropollutants as well as human activities, such  
1185 as mining, pastoralism, and tourism are major sources of pollution (Schmeller *et al.*, 2022), impacting soils  
1186 and their biodiversity. Improved data are further important to identify and better understand the interactions  
1187 of global change drivers, both in space but also in time, as exposure to anthropogenic factors typically  
1188 varies over the seasons (e.g. pastoralism in the summer and ski runs in the winter). Moreover, given the  
1189 high level of interactions between soil organisms, which causes conditional dependencies between groups  
1190 of soil biota and the environment, a holistic approach is needed when making inferences about possible  
1191 drivers of change or responses to given environmental variables. Accordingly, understanding the response  
1192 of soil biota to global change calls for the joint monitoring and analysis of multiple groups and species in  
1193 their interaction with each other and their environment (Eisenhauer *et al.*, 2022). Given the worldwide  
1194 distribution of mountains (Körner *et al.*, 2017; Snethlage *et al.*, 2022), we further recommend a  
1195 comparative approach to global change research in mountain soils and take advantage of the fact that  
1196 mountains across the world differ in their environmental conditions, their history of exposure to human  
1197 pressure, as well as in their environmental gradients. For example, whereas extreme temperatures are not  
1198 yet recurrent in most mountain regions worldwide, exposure to high temperatures and extreme dryness is  
1199 typical in certain ranges such as in the Mediterranean or inner European Alps, where soils and their biota

1200 show specific community composition and species adaptations in response to these conditions (Praeg *et al.*,  
1201 2020). Accordingly, comparative analyses of soil biodiversity, as well as of genetic and trait diversity across  
1202 mountain ranges are likely to yield interesting understanding with respect to evolutionary potential of  
1203 terrestrial ecosystem (Bardgett & van der Putten, 2014) in the face of global change. Similarly, beyond the  
1204 assessment of niche variation along environmental gradients within mountains (e.g. Malard *et al.*, 2022),  
1205 the quantification and comparison of niche properties across environmental gradients in different mountain  
1206 ranges is expected to help evaluate the potential influence of global change on taxa and communities as  
1207 well as improving our capacity to predict the fate of ecosystems and thereby inform conservation (e.g. Mod  
1208 *et al.*, 2021). Biogeographic studies and palaeoecological analyses might further provide useful information  
1209 on the distribution of species over evolutionary times and on the resilience of mountain soils to changes in  
1210 climate.

### 1211 1212 **(3) Opportunity 3: Increase policy-relevant mountain soil biodiversity science and improve mountain** 1213 **soil conservation and policies**

1214 Premise: Belowground biodiversity is essential to healthy soils, which in turn are crucial for food  
1215 production, aboveground biodiversity, climate control, and human health and security (Banerjee & van der  
1216 Heijden, 2023). Due to the intrinsic connection between terrestrial and aquatic environments, soil  
1217 biodiversity and healthy soils are particularly important in mountains in their role as water towers. However,  
1218 despite their importance and the growing interacting impacts of climate and land-use change, pollution, and  
1219 overexploitation (e.g. mining) in mountain regions, mountain soils and their biodiversity – even more so  
1220 than lowland soils – remain only poorly addressed in laws, restoration, and conservation policies (but see  
1221 Stanchi *et al.*, 2023). One of the numerous challenges associated with soil conservation and protection and  
1222 with formulating laws and guidelines for sustainable use of mountain soils is that soils are connected across  
1223 national borders and continents by human activity (van der Putten *et al.*, 2023), calling for international  
1224 agreements. An additional difficulty specific to mountains is their transboundary nature, with many  
1225 mountain ranges crossing national borders, which further requires reinforced international collaboration in  
1226 the establishment of meaningful policies. In that context, the Soil Conservation Protocol and the Soil  
1227 Working Group of the Alpine Convention represent valuable efforts. The difficulty of collecting data in  
1228 mountains further contributes to making their soils and the diversity of species they host a blind spot in  
1229 science, conservation, and policymaking. The observation that most parties to the Convention for Biological  
1230 Diversity (CBD) have no national target explicit to soil conservation and biodiversity (Guerra *et al.*, 2021)  
1231 and that the protection and conservation of soil biodiversity and soil ecosystem functioning have been  
1232 insufficient to date (Zeiss *et al.*, 2022) also applies to mountain soils.

1233 Direction: We support ongoing efforts (e.g. Guerra *et al.*, 2021; Arora, 2023; van der Putten *et al.*,  
1234 2023) to raise the importance of soil biodiversity in environmental policies and to formulate frameworks

1235 for the protection and restoration of soils (e.g. ‘EU Soil Strategy for 2030’ and the associated ‘Soil  
1236 Monitoring Law’). However, given the critical importance of healthy and biodiverse soils in mountains  
1237 (e.g. for natural risk regulation), we herewith call for dedicated efforts and explicit political commitments  
1238 towards their targeted protection. The ongoing development of National Biodiversity Strategies and Action  
1239 Plans in response to the adoption of the Kunming-Montreal Global Biodiversity Framework represents a  
1240 unique opportunity to collaborate on the formulation of soil biodiversity conservation targets and policy-  
1241 ready soil biodiversity indicators applicable to mountain ecosystems, which enable policy-makers to  
1242 prioritise mountain soils for conservation (Guerra *et al.*, 2021). In support of such developments, we  
1243 reiterate previous calls (Maestre & Eisenhauer, 2019; Guerra *et al.*, 2021, 2022) for improved monitoring  
1244 of soil biodiversity and soil-related essential biodiversity variables and for increased efforts to identify  
1245 hotspots of mountain soil biodiversity and endemism, as well as priority habitats in the light of ongoing and  
1246 future global change. We also call for the systematic evaluation of the efficiency of protected areas in  
1247 preserving mountain soil species and their functions (see e.g. Ciobanu *et al.*, 2019). International initiatives  
1248 such as SoilBON, the Global Soil Biodiversity Initiative, and the Global Soil Partnership of the United  
1249 Nations Food and Agriculture Organisation represent effective opportunities for mountain soil scientists to  
1250 engage with the endorsement of the Mountain Partnership (e.g. Stanchi *et al.*, 2023), the Global Mountain  
1251 Biodiversity Assessment, and other institutions committed to the conservation and sustainable use of  
1252 mountain biodiversity. Besides political commitments and increased scientific efforts, awareness raising  
1253 and education through effective communication methods (e.g. Steinwandter & Seeber, 2022) remain  
1254 essential on our path to safeguarding sustainable mountain soils.

## 1256 **VIII. CONCLUSIONS**

- 1257 (1) Despite a growing number of initiatives responding to the demand for data and knowledge on soil  
1258 biodiversity, there are still major gaps and blind spots that exist, especially for the Global South and  
1259 remote areas such as mountains.
- 1260 (2) This review intended to highlight the gaps in knowledge regarding mountains, which have become  
1261 even more vulnerable due to ongoing land-use and climate change. Given the natural hazards and  
1262 ecosystem services associated with mountain areas, maintaining soil health is of paramount  
1263 importance. However, due to difficulties in data collection and the lack of a systematic assessment  
1264 of the existing research corpus, addressing these challenges is proving challenging.
- 1265 (3) Here, we conducted a comprehensive review of the globally available data on biodiversity in  
1266 temperate and continental alpine soils, above the treeline. This is, to our knowledge, the first time  
1267 such data has been collated. Our systematic literature survey involved experts in the field of alpine  
1268 soil biology, where we obtained an overview of the geographical distribution and number of studies  
1269 focusing on alpine soil invertebrates, microbiota and cryptogams.

- 1270 (4) Our review has revealed research gaps in alpine regions outside of Europe and Central Asia, as well  
1271 as for soil cryptogams and soil invertebrates, which have relatively limited data available in  
1272 comparison to soil microbiota. Shortcomings were particularly notable among soil protists and soil  
1273 invertebrates, and for the vast majority of uncultivated prokaryotes and fungi, for which functional  
1274 or ecological descriptions are lacking. To address these issues, it will be necessary to improve  
1275 geographic and taxonomic coverage. All these soil organisms have evolved over millennia to  
1276 withstand the ever-growing extreme environmental conditions in mountain areas. Thus, there is a  
1277 pressing need for a wider range of knowledge on all fronts.
- 1278 (5) We highlight three crucial areas for future research and policymaking on soil biodiversity in  
1279 mountainous regions, emphasising their global distribution and the distinctive challenges posed by  
1280 elevational gradients, remoteness and exposure to global change.
- 1281 (6) We call for a significant improvement in mountain soil biodiversity data, while we emphasise the  
1282 need for enhancing the understanding of environmental drivers and consequences for biodiversity  
1283 in mountain soils, advocating for improved spatial and temporal data resolution. Furthermore, we  
1284 stress the importance of comparative analyses across different mountain ranges to inform  
1285 conservation strategies in the face of global change.
- 1286 (7) Our review recommends clear political commitments, international collaboration, and the  
1287 incorporation of biodiversity in mountain soils within global frameworks. This underscores the  
1288 importance of raising awareness and providing education to promote the conservation and  
1289 sustainable use of mountain soils.

## 1292 IX. ACKNOWLEDGEMENTS

1293  
1294 Michele Freppaz acknowledges the support of NBFC to University of Torino, funded by the Italian Ministry  
1295 of University and Research, PNRR, Missione 4 Componente 2, 'Dalla ricerca all'impresa', Investimento  
1296 1.4, Project CN00000033.

1297 Andrea Britton and Andy Taylor were supported by the Scottish Government Rural and Environmental  
1298 Science and Analytical Services (RESAS) as part of the Scottish Government Environment, Natural  
1299 Resources and Agriculture (ENRA) Strategic Research Programme, project JHI-D4-3.

1300 Beat Frey acknowledges financial support from Fondation Petersberg pro Planta et Natura (grant number:  
1301 01.MZ/2023).

## 1303 X. REFERENCES

1304

- 1305 ABED, R.M.M., TAMM, A., HASSENRÜCK, C., AL-RAWAHI, A.N., RODRÍGUEZ-CABALLERO, E., FIEDLER, S.,  
1306 MAIER, S. & WEBER, B. (2019). Habitat-dependent composition of bacterial and fungal communities in  
1307 biological soil crusts from Oman. *Scientific Reports* **9**, 6468.
- 1308 ADAMCZYK, M., HAGEDORN, F., WIPF, S., DONHAUSER, J., VITTOZ, P., RIXEN, C., FROSSARD, A.,  
1309 THEURILLAT, J.P. & FREY, B. (2019). The soil microbiome of GLORIA mountain summits in the Swiss  
1310 Alps. *Frontiers in Microbiology* **10**, 1080.
- 1311 ADAMCZYK, M., RÜTHI, J. & FREY, B. (2021). Root exudates increase soil respiration and alter microbial  
1312 community structure in alpine permafrost and active layer soils. *Environmental Microbiology* **23**, 2152–  
1313 2168.
- 1314 ADL, M.S. & GUPTA, V.S. (2006). Protists in soil ecology and forest nutrient cycling. *Canadian Journal of*  
1315 *Forest Research* **36**, 1805–1817.
- 1316 ADL, S.M., BASS, D., LANE, C.E., LUKEŠ, J., SCHOCH, C.L., SMIRNOV, A., AGATHA, S., BERNEY, C., BROWN,  
1317 M.W., BURKI, F., CÁRDENAS, P., ČEPIČKA, I., CHISTYAKOVA, L., DEL CAMPO, J., DUNTHORN, M., *et al.*  
1318 (2019). Revisions to the classification, nomenclature, and diversity of eukaryotes. *The Journal of*  
1319 *Eukaryotic Microbiology* **66**, 4–119.
- 1320 ALATALO, J.M., JÄGERBRAND, A.K., JUHANSON, J., MICHELSEN, A. & ĽUPTÁČIK, P. (2017). Impacts of  
1321 twenty years of experimental warming on soil carbon, nitrogen, moisture and soil mites across  
1322 alpine/subarctic tundra communities. *Scientific Reports* **7**, 44489.
- 1323 ALEXANDER, J.M., LEMBRECHTS, J.J., CAVIERES, L.A., DAEHLER, C., HAIDER, S., KUEFFER, C., LIU, G.,  
1324 MCDUGALL, K., MILBAU, A., PAUCHARD, A., REW, L.J. & SEIPEL, T. (2016). Plant invasions into  
1325 mountains and alpine ecosystems: current status and future challenges. *Alpine Botany* **126**, 89–103.
- 1326 ANTHONY, M.A., BENDER, S.F. & VAN DER HEIJDEN, M.G.A. (2023). Enumerating soil biodiversity.  
1327 *Proceedings of the National Academy of Sciences of the United States of America* **120**, e2304663120.
- 1328 AOKI, Y., HOSHINO, M. & MATSUBARA, T. (2007). Silica and testate amoebae in a soil under pine–oak  
1329 forest. *Geoderma* **142**, 29–35.
- 1330 ARADOTTIR, A.L. (2012). Turf transplants for restoration of alpine vegetation: does size matter? *Journal of*  
1331 *Applied Ecology* **49**, 439–446.
- 1332 ARMITAGE, H.F., BRITTON, A.J., VAN DER WAL, R. & WOODIN, S.J. (2014). The relative importance of  
1333 nitrogen deposition as a driver of *Racomitrium* heath species composition and richness across Europe.  
1334 *Biological Conservation* **171**, 224–231.
- 1335 ARMSTRONG, A.J. & BRAND, R.F. (2012). Invertebrates on isolated peaks in the uKhahlamba-Drakensberg  
1336 Park World Heritage Site, South Africa. *Koedoe* **54**, a1082.

- 1337 ARMSTRONG, R.A. (2017). Adaptation of lichens to extreme conditions. In *Plant adaptation strategies in*  
1338 *changing environment*: 1–27. Shukla, V., Kumar, S. & Kumar, N. (Eds.). Singapore: Springer Singapore.
- 1339 ARORA, P. (2023). Life below land: the need for a new sustainable development goal. *Frontiers in*  
1340 *Environmental Science* **11**, 1215282.
- 1341 ARRAIANO-CASTILHO, R., BIDARTONDO, M.I., NISKANEN, T., CLARKSON, J.J., BRUNNER, I., ZIMMERMANN,  
1342 S., SENN-IRLET, B., FREY, B., PEINTNER, U., MRAK, T. & SUZ, L.M. (2021). Habitat specialisation  
1343 controls ectomycorrhizal fungi above the treeline in the European Alps. *New Phytologist* **229**, 2901–  
1344 2916.
- 1345 ARRÓNIZ-CRESPO, M., PÉREZ-ORTEGA, S., DE LOS RÍOS, A., GREEN, T.G.A., OCHOA-HUESO, R.,  
1346 CASERMEIRO, M.Á., DE LA CRUZ, M.T., PINTADO, A., PALACIOS, D., ROZZI, R., TYSKLIND, N. & SANCHO,  
1347 L.G. (2014). Bryophyte-cyanobacteria associations during primary succession in recently Deglaciaded  
1348 areas of Tierra del Fuego (Chile). *PLoS ONE* **9**, e96081.
- 1349 ASLANI, F., GEISEN, S., NING, D., TEDERSOO, L. & BAHRAM, M. (2022). Towards revealing the global  
1350 diversity and community assembly of soil eukaryotes. *Ecology Letters* **25**, 65–76.
- 1351 AUSTIN, G. & COOPER, D.J. (2016). Persistence of high elevation fens in the Southern Rocky Mountains,  
1352 on Grand Mesa, Colorado, U.S.A. *Wetlands Ecology and Management* **24**, 317–334.
- 1353 AUSTRHEIM, G. & OLSSON, E.G.A. (1999). How does continuity in grassland management after ploughing  
1354 affect plant community patterns? *Plant Ecology* **145**, 59–74.
- 1355 AUSTRHEIM, G. (2002). Plant diversity patterns in semi-natural grasslands along an elevational gradient in  
1356 Southern Norway. *Plant Ecology* **161**, 193–205.
- 1357 BAHRAM, M., ANSLAN, S., HILDEBRAND, F., BORK, P. & TEDERSOO, L. (2019). Newly designed 16S rRNA  
1358 metabarcoding primers amplify diverse and novel archaeal taxa from the environment. *Environmental*  
1359 *Microbiology Reports* **11**, 487–494.
- 1360 BALDRIAN, P. & VALÁSKOVÁ, V. (2008). Degradation of cellulose by basidiomycetous fungi. *FEMS*  
1361 *Microbiology Reviews* **32**, 501–521.
- 1362 BANERJEE, S. & VAN DER HEIJDEN, M.G.A. (2023). Soil microbiomes and one health. *Nature Reviews*  
1363 *Microbiology* **21**, 6–20.
- 1364 BANERJEE, S., SCHLAEPI, K. & VAN DER HEIJDEN, M.G.A. (2018). Keystone taxa as drivers of microbiome  
1365 structure and functioning. *Nature Reviews Microbiology* **16**, 567–576.
- 1366 BANIYA, C.B., SOLHØY, T., GAUSLAA, Y. & PALMER, M.W. (2012). Richness and Composition of Vascular  
1367 Plants and Cryptogams along a High Elevational Gradient on Buddha Mountain, Central Tibet. *Folia*  
1368 *Geobotanica* **47**, 135–151.
- 1369 BARDGETT, R.D. & VAN DER PUTTEN, W.H. (2014). Belowground biodiversity and ecosystem functioning.  
1370 *Nature* **515**, 505–511.



- 1371 BARUCK, J., NESTROY, O., SARTORI, G., BAIZE, D., TRIDL, R., VRŠČAJ, B., BRÄM, E., GRUBER, F.E.,  
1372 HEINRICH, K. & GEITNER, C. (2016). Soil classification and mapping in the Alps: The current state and  
1373 future challenges. *Geoderma* **264**, 312–331.
- 1374 BAUER, T. (1985). Beetles which use a setal trap to hunt springtails: the hunting strategy and apparatus of  
1375 *Leistus* (Coleoptera, Carabidae). *Pedobiologia* **28**, 275–287.
- 1376 BERGAMINI, A., UNGRICH, S. & HOFMANN, H. (2009). An elevational shift of cryophilous bryophytes in  
1377 the last century - an effect of climate warming? *Diversity and Distributions* **15**, 871–879.
- 1378 BERNASCONI, S.M., BAUDER, A., BOURDON, B., BRUNNER, I., BÜNEMANN, E., CHRIS, I., DERUNGS, N.,  
1379 EDWARDS, P., FARINOTTI, D., FREY, B., FROSSARD, E., FURRER, G., GIERGA, M., GÖRANSSON, H.,  
1380 GÜLLAND, K., *et al.* (2011). Chemical and Biological Gradients along the Damma Glacier Soil  
1381 Chronosequence, Switzerland. *Vadose Zone Journal* **10**, 867–883.
- 1382 BERON, P. (2008). *High Altitude Isopoda, Arachnida and Myriapoda in the Old World*. Sofia: Pensoft.
- 1383 BERON, P. (2016). High Altitude Isopoda, Arachnida and Myriapoda in the Old World (supplementa and  
1384 corrigenda 2008–2016). *Zenodo*.
- 1385 BHUNJUN, C.S., NISKANEN, T., SUWANNARACH, N., WANNATHES, N., CHEN, Y.-J., MCKENZIE, E.H.C.,  
1386 MAHARACHCHIKUMBURA, S.S.N., BUYCK, B., ZHAO, C.-L., FAN, Y.-G., ZHANG, J.-Y., DISSANAYAKE,  
1387 A.J., MARASINGHE, D.S., JAYAWARDENA, R.S., KUMLA, J., *et al.* (2022). The numbers of fungi: are the  
1388 most speciose genera truly diverse? *Fungal Diversity* **114**, 387–462.
- 1389 BILLINGS, W.D. (1974). Adaptations and origins of alpine plants. *Arctic and Alpine Research* **6**, 129–142.
- 1390 BILOVITZ, P.O., NASCIBENE, J., TUTZER, V., WALLNER, A. & MAYRHOFER, H. (2014a). Terricolous lichens  
1391 in the glacier forefield of the Rötkees (Eastern Alps, South Tyrol, Italy). *Phyton* **54**, 245–250.
- 1392 BILOVITZ, P.O., WALLNER, A., TUTZER, V., NASCIBENE, J. & MAYRHOFER, H. (2014b). Terricolous lichens  
1393 in the glacier forefield of the Gaisbergferner (Eastern Alps, Tyrol, Austria). *Phyton* **54**, 235–243.
- 1394 BILOVITZ, P.O., WALLNER, A., TUTZER, V., NASCIBENE, J. & MAYRHOFER, H. (2015). Terricolous lichens  
1395 in the glacier forefield of the Pasterze (Eastern Alps, Carinthia, Austria). *Phyton* **55**, 201–214.
- 1396 BISHOP, T.R., ROBERTSON, M.P., VAN RENSBURG, B.J. & PARR, C.L. (2014). Elevation-diversity patterns  
1397 through space and time: ant communities of the Maloti-Drakensberg Mountains of Southern Africa.  
1398 *Journal of Biogeography*. **41**, 2256–2268.
- 1399 BISHOP, T.R., ROBERTSON, M.P., VAN RENSBURG, B.J. & PARR, C.L. (2017). Coping with the cold:  
1400 minimum temperatures and thermal tolerances dominate the ecology of mountain ants. *Ecological*  
1401 *Entomology* **42**, 105–114.
- 1402 BJORBÆKMO, M.F.M., CARLSEN, T., BRYSTING, A., VRÅLSTAD, T., HØILAND, K., UGLAND, K.I., GEML, J.,  
1403 SCHUMACHER, T. & KAUSERUD, H. (2010). High diversity of root associated fungi in both alpine and  
1404 arctic *Dryas octopetala*. *BMC Plant Biology* **10**, 244.

- 1405 BLAALID, R., CARLSEN, T., KUMAR, S., HALVORSEN, R., UGLAND, K.I., FONTANA, G. & KAUSERUD, H.  
1406 (2012). Changes in the root-associated fungal communities along a primary succession gradient analysed  
1407 by 454 pyrosequencing. *Molecular Ecology* **21**, 1897–1908.
- 1408 BLIGNY, R. & AUBERT, S. (2012). Specificities of metabolite profiles in alpine plants. In *Plants in Alpine*  
1409 *Regions*: 99–120. Lütz, C. (Ed.). Vienna, Austria: Springer Vienna.
- 1410 BONKOWSKI, M., DUMACK, K. & FIORE-DONNO, A.M. (2019). The Protists in soil—A token of untold  
1411 eukaryotic diversity. In *Modern Soil Microbiology, Third Edition*. CRC Press.
- 1412 BONKOWSKI, M. (2004). Protozoa and plant growth: the microbial loop in soil revisited. *New Phytologist*  
1413 **162**, 617–631.
- 1414 BORCHHARDT, N., BAUM, C., THIEM, D., KÖPCKE, T., KARSTEN, U., LEINWEBER, P. & HRYNKIEWICZ, K.  
1415 (2019). Soil microbial phosphorus turnover and identity of algae and fungi in biological soil crusts along  
1416 a transect in a glacier foreland. *European Journal of Soil Biology* **91**, 9–17.
- 1417 BORG DAHL, M., BREJNROD, A.D., RUSSEL, J., SØRENSEN, S.J. & SCHNITTLER, M. (2019). Different degrees  
1418 of niche differentiation for bacteria, fungi, and myxomycetes within an elevational transect in the  
1419 German Alps. *Microbial Ecology* **78**, 764–780.
- 1420 BOSSON, J.B., HUSS, M., CAUVY-FRAUNIÉ, S., CLÉMENT, J.C., COSTES, G., FISCHER, M., POULENARD, J. &  
1421 ARTHAUD, F. (2023). Future emergence of new ecosystems caused by glacial retreat. *Nature* **620**, 562–  
1422 569.
- 1423 BOUAICHA, O., MIMMO, T., TIZIANI, R., PRAEG, N., POLIDORI, C., LUCINI, L., VIGANI, G., TERZANO, R.,  
1424 SANCHEZ-HERNANDEZ, J.C., ILLMER, P., CESCO, S. & BORRUSO, L. (2022). Microplastics make their way  
1425 into the soil and rhizosphere: A review of the ecological consequences. *Rhizosphere* **22**, 100542.
- 1426 BOYER, S.L. & GIRIBET, G. (2009). Welcome back New Zealand: regional biogeography and Gondwanan  
1427 origin of three endemic genera of mite harvestmen (Arachnida, Opiliones, Cyphophthalmi). *Journal of*  
1428 *Biogeography* **36**, 1084–1099.
- 1429 BRAGAZZA, L., GERDOL, R. & RYDIN, H. (2003). Effects of mineral and nutrient input on mire bio-  
1430 geochemistry in two geographical regions. *Journal of Ecology* **91**, 417–426.
- 1431 BRANDMAYR, P. & PIZZOLOTTO, R. (2016). Climate change and its impact on epigeal and hypogean carabid  
1432 beetles. *Periodicum Biologorum* **118**, 147–162.
- 1433 BRIGHENTI, S., HOTALING, S., FINN, D.S., FOUNTAIN, A.G., HAYASHI, M., HERBST, D., SAROS, J.E.,  
1434 TRONSTAD, L.M. & MILLAR, C.I. (2021). Rock glaciers and related cold rocky landforms: Overlooked  
1435 climate refugia for mountain biodiversity. *Global Change Biology* **27**, 1504–1517.
- 1436 BRITTON, A.J., GIBBS, S., FISHER, J.M. & HELLIWELL, R.C. (2019). Impacts of nitrogen deposition on carbon  
1437 and nitrogen cycling in alpine *Racomitrium* heath in the UK and prospects for recovery. *Environmental*  
1438 *Pollution* **254**, 112986.

- 1439 BRITTON, A.J., HELLIWELL, R.C., LILLY, A., DAWSON, L., FISHER, J.M., COULL, M. & ROSS, J. (2011). An  
1440 integrated assessment of ecosystem carbon pools and fluxes across an oceanic alpine toposequence.  
1441 *Plant and Soil* **345**, 287–302.
- 1442 BRITTON, A.J., MITCHELL, R.J., FISHER, J.M., RIACH, D.J. & TAYLOR, A.F.S. (2018). Nitrogen deposition  
1443 drives loss of moss cover in alpine moss-sedge heath via lowered C : N ratio and accelerated  
1444 decomposition. *New Phytologist* **218**, 470–478.
- 1445 BRUNNER, I., FREY, B., HARTMANN, M., ZIMMERMANN, S., GRAF, F., SUZ, L.M., NISKANEN, T.,  
1446 BIDARTONDO, M.I. & SENN-IRLET, B. (2017). Ecology of Alpine Macrofungi - Combining Historical  
1447 with Recent Data. *Frontiers in Microbiology* **8**, 2066.
- 1448 BRUNNER, I., PLÖTZE, M., RIEDER, S., ZUMSTEG, A., FURRER, G. & FREY, B. (2011). Pioneering fungi from  
1449 the Damma glacier forefield in the Swiss Alps can promote granite weathering. *Geobiology* **9**, 266–279.
- 1450 BRYN, A. & POTTHOFF, K. (2018). Elevational treeline and forest line dynamics in Norwegian mountain  
1451 areas – a review. *Landscape Ecology* **33**, 1225–1245.
- 1452 BUCKLEY, L.B., EHRENBERGER, J.C. & ANGILLETTA, M.J. (2015). Thermoregulatory behaviour limits local  
1453 adaptation of thermal niches and confers sensitivity to climate change. *Functional Ecology* **29**, 1038–  
1454 1047.
- 1455 BUDA, J., AZZONI, R.S., AMBROSINI, R., FRANZETTI, A. & ZAWIERUCHA, K. (2020). Effects of locality and  
1456 stone surface structure on the distribution of Collembola inhabiting a novel habitat – the stone-ice border  
1457 on an alpine glacier. *Acta Oecologica* **108**, 103629.
- 1458 BÜDEL, B., COLESIE, C., GREEN, T.G.A., GRUBE, M., LÁZARO SUAUA, R., LOEWEN-SCHNEIDER, K., MAIER,  
1459 S., PEER, T., PINTADO, A., RAGGIO, J., RUPRECHT, U., SANCHO, L.G., SCHROETER, B., TÜRK, R., WEBER,  
1460 B., *et al.* (2014). Improved appreciation of the functioning and importance of biological soil crusts in  
1461 Europe: the Soil Crust International Project (SCIN). *Biodiversity and Conservation* **23**, 1639–1658.
- 1462 BÜDEL, B., DARIENKO, T., DEUTSCHEWITZ, K., DOJANI, S., FRIEDL, T., MOHR, K.I., SALISCH, M., REISSER,  
1463 W. & WEBER, B. (2009). Southern African biological soil crusts are ubiquitous and highly diverse in  
1464 drylands, being restricted by rainfall frequency. *Microbial Ecology* **57**, 229–247.
- 1465 BÜDEL, B., FRIEDL, T. & BEYSCHLAG, W. (2024). *Biology of Algae, Lichens and Bryophytes*. 1st edn.  
1466 Heidelberg, Germany: Springer Spektrum Berlin.
- 1467 BUENO, C.G. & JIMÉNEZ, J.J. (2014). Livestock grazing activities and wild boar rooting affect alpine  
1468 earthworm communities in the Central Pyrenees (Spain). *Applied Soil Ecology* **83**, 71–78.
- 1469 BUENO, C.G., WILLIAMSON, S.N., BARRIO, I.C., HELGADÓTTIR, Á. & HIK, D.S. (2016). Moss mediates the  
1470 influence of shrub species on soil properties and processes in alpine tundra. *PLoS ONE* **11**, e0164143.
- 1471 BUENO DE MESQUITA, C.P., KNELMAN, J.E., KING, A.J., FARRER, E.C., PORAZINSKA, D.L., SCHMIDT, S.K.  
1472 & SUDING, K.N. (2017). Plant colonization of moss-dominated soils in the alpine: Microbial and  
1473 biogeochemical implications. *Soil Biology and Biochemistry* **111**, 135–142.

- 1474 BUENO DE MESQUITA, C.P., SARTWELL, S.A., SCHMIDT, S.K. & SUDING, K.N. (2020). Growing-season  
1475 length and soil microbes influence the performance of a generalist bunchgrass beyond its current range.  
1476 *Ecology* **101**, e03095.
- 1477 BURGA, C., KLÖTZLI, F. & GRABHERR, G. (2004). *Gebirge der Erde. Landschaft, Klima, Pflanzenwelt*.  
1478 Stuttgart, Germany: Ulmer.
- 1479 BURKI, F., ROGER, A.J., BROWN, M.W. & SIMPSON, A.G.B. (2020). The new tree of eukaryotes. *Trends in*  
1480 *Ecology and Evolution* **35**, 43–55.
- 1481 BURTON, V.J., CONTU, S., DE PALMA, A., HILL, S.L.L., ALBRECHT, H., BONE, J.S., CARPENTER, D.,  
1482 CORSTANJE, R., DE SMEDT, P., FARRELL, M., FORD, H.V., HUDSON, L.N., INWARD, K., JONES, D.T.,  
1483 KOSEWSKA, A., *et al.* (2022). Land use and soil characteristics affect soil organisms differently from  
1484 above-ground assemblages. *BMC Ecology and Evolution* **22**, 135.
- 1485 CARLSON, B.Z., CHOLER, P., RENAUD, J., DEDIEU, J.-P. & THUILLER, W. (2015). Modelling snow cover  
1486 duration improves predictions of functional and taxonomic diversity for alpine plant communities.  
1487 *Annals of Botany* **116**, 1023–1034.
- 1488 CARLSSON, B. & CALLAGHAN, T. (1991). Positive Plant Interactions in Tundra Vegetation and the  
1489 Importance of Shelter. *Journal of Ecology* **79**, 973–983.
- 1490 CASAGRANDE BACCHIOCCHI, S., ZERBE, S., CAVIERES, L.A. & WELLSTEIN, C. (2019). Impact of ski piste  
1491 management on mountain grassland ecosystems in the Southern Alps. *Science of the Total Environment*  
1492 **665**, 959–967.
- 1493 CHALADZE, G. (2012). Climate-based model of spatial pattern of the species richness of ants in Georgia.  
1494 *Journal of Insect Conservation* **16**, 791–800.
- 1495 CHAMIZO, S., CANTÓN, Y., LÁZARO, R. & DOMINGO, F. (2013). The role of biological soil crusts in soil  
1496 moisture dynamics in two semiarid ecosystems with contrasting soil textures. *Journal of Hydrology* **489**,  
1497 74–84.
- 1498 CHEN, J., YANG, Y., WANG, S., SUN, H. & SCHÖB, C. (2020). Shrub facilitation promotes selective tree  
1499 establishment beyond the climatic treeline. *Science of the Total Environment* **708**, 134618.
- 1500 CHENG, F., GARZIONE, C., LI, X., SALZMANN, U., SCHWARZ, F., HAYWOOD, A.M., TINDALL, J., NIE, J., LI,  
1501 L., WANG, L., ABBOTT, B.W., ELLIOTT, B., LIU, W., UPADHYAY, D., ARNOLD, A. & TRIPATI, A. (2022).  
1502 Alpine permafrost could account for a quarter of thawed carbon based on Plio-Pleistocene paleoclimate  
1503 analogue. *Nature Communication* **13**, 1329.
- 1504 CHEN, B., JIAO, S., LUO, S., MA, B., QI, W., CAO, C., ZHAO, Z., DU, G. & MA, X. (2021). High soil pH  
1505 enhances the network interactions among bacterial and archaeal microbiota in alpine grasslands of the  
1506 Tibetan Plateau. *Environmental Microbiology* **23**, 464–477.
- 1507 CIOBANU, M., EISENHAEUER, N., STOICA, I.-A. & CESARZ, S. (2019). Natura 2000 priority and non-priority  
1508 habitats do not differ in soil nematode diversity. *Applied Soil Ecology* **135**, 166–173.

- 1509 CLARHOLM, M. (1985). Interactions of bacteria, protozoa and plants leading to mineralization of soil  
1510 nitrogen. *Soil Biology and Biochemistry* **17**, 181–187.
- 1511 CLEAVITT, N. (2004). Comparative ecology of a lowland and a subalpine species of *Mnium* in the northern  
1512 Rocky Mountains. *Plant Ecology* **174**, 205–216.
- 1513 COLDEA, G. (2003). The Alpine Flora and Vegetation of the South-Eastern Carpathians. In *Alpine*  
1514 *Biodiversity in Europe*, Ecological Studies: 65–72. Nagy, L., Grabherr, G., Körner, C. & Thompson,  
1515 D.B.A. (Eds.). Berlin, Germany: Springer Springer-Verlag Berlin Heidelberg.
- 1516 COLESIE, C., GOMMEAUX, M., GREEN, T.G.A. & BÜDEL, B. (2014). Biological soil crusts in continental  
1517 Antarctica: Garwood Valley, southern Victoria Land, and Diamond Hill, Darwin Mountains region.  
1518 *Antarctic Science* **26**, 115–123.
- 1519 COLESIE, C., GREEN, T.G.A., RAGGIO, J. & BÜDEL, B. (2016). Summer activity patterns of antarctic and high  
1520 alpine lichendominated biological soil crusts—similar but different? *Arctic, Antarctic, and Alpine*  
1521 *Research* **48**, 449–460.
- 1522 COLLOFF, M.J. (2015). The *Crotonia* fauna of New Zealand revisited (Acari: Oribatida): taxonomy,  
1523 phylogeny, ecological distribution and biogeography. *Zootaxa* **3947**, 1–29.
- 1524 COOPER, D.J., WOLF, E.C., COLSON, C., VERING, W., GRANDA, A. & MEYER, M. (2010). Alpine peatlands  
1525 of the Andes, Cajamarca, Peru. *Arctic, Antarctic, and Alpine Research* **42**, 19–33.
- 1526 CRIPPS, C.L., EBERHARDT, U., SCHÜTZ, N., BEKER, H.J., VERA S EVENSON & HORAK, E. (2019). The genus  
1527 *Hebeloma* in the Rocky Mountain alpine zone. *MykoKeys* **46**, 1–54.
- 1528 CRIPPS, C.L., LARSSON, E. & HORAK, E. (2010). Subgenus *Mallocybe* (*Inocybe*) in the Rocky Mountain  
1529 alpine zone with molecular reference to European arctic-alpine material. *North American Fungi* **5**, 97–  
1530 126.
- 1531 CRISFIELD, V.E., MACDONALD, S.E. & GOULD, A.J. (2012). Effects of recreational traffic on alpine plant  
1532 communities in the Northern Canadian Rockies. *Arctic, Antarctic, and Alpine Research* **44**, 277–287.
- 1533 CROWTHER, T.W., BODDY, L. & HEFIN JONES, T. (2012). Functional and ecological consequences of  
1534 saprotrophic fungus-grazer interactions. *The ISME Journal* **6**, 1992–2001.
- 1535 DANIÉLS, F.J.A., TALBOT, S.S., TALBOT, S.L. & SCHOFIELD, W.B. (2004). Phytosociological study of the  
1536 dwarf shrub heath of Simeonof Wilderness, Shumagin Islands, Southwestern Alaska. *Phytocoenologia*  
1537 **34**, 465–489.
- 1538 DAWES, M.A., SCHLEPPI, P., HÄTTENSCHWILER, S., RIXEN, C. & HAGEDORN, F. (2017). Soil warming opens  
1539 the nitrogen cycle at the alpine treeline. *Global Change Biology* **23**, 421–434.
- 1540 DECAËNS, T. (2010). Macroecological patterns in soil communities. *Global Ecology and Biogeography* **19**,  
1541 287–302.
- 1542 DEHARVENG, L. (2004). Recent advances in Collembola systematics. *Pedobiologia* **48**, 415–433.

- 1543 DELGADO-BAQUERIZO, M. (2019). Obscure soil microbes and where to find them. *The ISME Journal* **13**,  
1544 2120–2124.
- 1545 DELGADO, R., SÁNCHEZ-MARAÑÓN, M., MARTÍN-GARCÍA, J.M., ARANDA, V., SERRANO-BERNARDO, F. &  
1546 ROSÚA, J.L. (2007). Impact of ski pistes on soil properties: a case study from a mountainous area in the  
1547 Mediterranean region. *Soil Use & Management* **23**, 269–277.
- 1548 DENGLER, J., JANIŠOVÁ, M., TÖRÖK, P. & WELLSTEIN, C. (2014). Biodiversity of Palearctic grasslands: a  
1549 synthesis. *Agriculture, Ecosystem & Environment* **182**, 1–14.
- 1550 DEVETTER, M., HÁNĚL, L., ŘEHÁKOVÁ, K. & DOLEŽAL, J. (2017). Diversity and feeding strategies of soil  
1551 microfauna along elevation gradients in Himalayan cold deserts. *PLoS ONE* **12**, e0187646.
- 1552 DIBARI, C., COSTAFREDA-AUMEDES, S., ARGENTI, G., BINDI, M., CAROTENUTO, F., MORIONDO, M.,  
1553 PADOVAN, G., PARDINI, A., STAGLIANÒ, N., VAGNOLI, C. & BRILLI, L. (2020). Expected Changes to  
1554 Alpine Pastures in Extent and Composition under Future Climate Conditions. *Agronomy* **10**, 926.
- 1555 DICKSON, L.G. (2000). Constraints to nitrogen fixation by cryptogamic crusts in a polar desert ecosystem,  
1556 Devon Island, N.W.T., Canada. *Arctic, Antarctic, and Alpine Research* **32**, 40–45.
- 1557 DIERSSEN, K. & DIERSSEN, B. (2005). Studies on the vegetation of fens, springs and snow fields in West  
1558 Greenland. *Phytocoenologia* **35**, 849–885.
- 1559 DILLON, M.E., FRAZIER, M.R. & DUDLEY, R. (2006). Into thin air: Physiology and evolution of alpine  
1560 insects. *Integrative and Comparative Biology* **46**, 49–61.
- 1561 DI NUZZO, L., VALLESE, C., BENESPERI, R., GIORDANI, P., CHIARUCCI, A., DI CECCO, V., DI MARTINO, L.,  
1562 DI MUSCIANO, M., GHEZA, G., LELLI, C., SPITALE, D. & NASCIMBENE, J. (2021). Contrasting multitaxon  
1563 responses to climate change in Mediterranean mountains. *Scientific Reports* **11**, 4438.
- 1564 DONHAUSER, J. & FREY, B. (2018). Alpine soil microbial ecology in a changing world. *FEMS Microbiological*  
1565 *Ecology* **94**.
- 1566 DONHAUSER, J., NIKLAUS, P.A., ROUSK, J., LAROSE, C. & FREY, B. (2020). Temperatures beyond the  
1567 community optimum promote the dominance of heat-adapted, fast growing and stress resistant bacteria  
1568 in alpine soils. *Soil Biology and Biochemistry* **148**, 107873.
- 1569 DONHAUSER, J., QI, W., BERGK-PINTO, B. & FREY, B. (2021). High temperatures enhance the microbial  
1570 genetic potential to recycle C and N from necromass in high-mountain soils. *Global Change Biology* **27**,  
1571 1365–1386.
- 1572 DRESCH, P., FALBESONER, J., ENNEMOSER, C., HITTORF, M., KUHNERT, R. & PEINTNER, U. (2019). Emerging  
1573 from the ice-fungal communities are diverse and dynamic in earliest soil developmental stages of a  
1574 receding glacier. *Environmental Microbiology* **21**, 1864–1880.
- 1575 DRIESSEN, M.M. & KIRKPATRICK, J.B. (2017). The implications of succession after fire for the conservation  
1576 management of moorland invertebrate assemblages. *Journal of Insect Conservation* **21**, 15–37.

- 1577 DUNN, R.R., GUÉNARD, B., WEISER, M.D. & SANDERS, N.J. (2009). Geographic Gradients. In *Ant Ecology*:  
1578 38–58. Lach, L., Parr, C. & Abbott, K. (Eds.). Oxford University Press.
- 1579 EDWARDS, C.A. & ARANCON, N.Q. (2022). *Biology and ecology of earthworms*. New York, NY: Springer  
1580 US.
- 1581 EDWARDS, I.P. & ZAK, D.R. (2010). Phylogenetic similarity and structure of Agaricomycotina communities  
1582 across a forested landscape. *Molecular Ecology* **19**, 1469–1482.
- 1583 EGLI, M., DAHMS, D. & NORTON, K. (2014). Soil formation rates on silicate parent material in alpine  
1584 environments: Different approaches—different results? *Geoderma* **213**, 320–333.
- 1585 EGLI, M. & POULENARD, J. (2016). Soils of mountainous landscapes. In *International Encyclopedia of*  
1586 *Geography*: 1–10. Oxford, UK: John Wiley & Sons, Ltd.
- 1587 EISENHAEUER, N., BENDER, S.F., CALDERÓN-SANOU, I., DE VRIES, F.T., LEMBRECHTS, J.J., THULLER, W.,  
1588 WALL, D.H., ZEISS, R., BAHRAM, M., BEUGNON, R., BURTON, V.J., CROWTHER, T.W., DELGADO-  
1589 BAQUERIZO, M., GEISEN, S., KARDOL, P., *et al.* (2022). Frontiers in soil ecology—Insights from the  
1590 World Biodiversity Forum 2022. *Journal of Sustainable Agriculture and Environment* **1**, 245–261.
- 1591 EO, J., KIM, M.-H., KWON, S.-I. & SONG, Y.-J. (2016). Response of Soil Mesofauna and Ground-dwelling  
1592 Arthropods to Plant Communities in a Mountain Pasture. *Korean Journal of Environmental Biology* **34**,  
1593 233–239.
- 1594 ESTERMANN, A.H., TEIXEIRA PEREIRA BASSIARIDIS, J., LOOS, A., SOLBACH, M.D., BONKOWSKI, M., HESS,  
1595 S. & DUMACK, K. (2023). Fungivorous protists in the rhizosphere of *Arabidopsis thaliana* – Diversity,  
1596 functions, and publicly available cultures for experimental exploration. *Soil Biology and Biochemistry*  
1597 **187**, 109206.
- 1598 EUROPEAN ENVIRONMENT AGENCY (2019). 05. Land and Soil. In *The European environment — state and*  
1599 *outlook 2020: knowledge for transition to a sustainable Europe*: 112–131. Luxembourg,  
1600 Luxembourg: Publications Office of the European Environment.
- 1601 EVANS, R.D. & JOHANSEN, J.R. (1999). Microbiotic crusts and ecosystem processes. *Critical Reviews in*  
1602 *Plant Sciences* **18**, 183–225.
- 1603 EVERSMAN, S. (1995). Lichens of alpine meadows on the Beartooth Plateau, Montana and Wyoming,  
1604 U.S.A. *Arctic and Alpine Research* **27**, 400–406.
- 1605 FAO, ITPS, GSBI, CBD & EC (2020). *State of knowledge of soil biodiversity - Status, challenges and*  
1606 *potentialities*. Rome, Italy: Food and Agriculture Organization of the United Nations (FAO).
- 1607 FAO (2015). *Understanding Mountain Soils: A contribution from mountain areas to the International Year*  
1608 *of Soils 2015*. Rome, Italy: Food and Agriculture Organization of the United Nations (FAO).
- 1609 FARRER, E.C., PORAZINSKA, D.L., SPASOJEVIC, M.J., KING, A.J., BUENO DE MESQUITA, C.P., SARTWELL,  
1610 S.A., SMITH, J.G., WHITE, C.T., SCHMIDT, S.K. & SUDING, K.N. (2019). Soil Microbial Networks Shift  
1611 Across a High-Elevation Successional Gradient. *Frontiers in Microbiology* **10**, 2887.

- 1612 FAVERO-LONGO, S.E. & PIERVITTORI, R. (2010). Lichen-plant interactions. *Journal of Plant Interactions* **5**,  
1613 163–177.
- 1614 FENG, M., VARLIERO, G., QI, W., STIERLI, B., EDWARDS, A., ROBINSON, S., VAN DER HEIJDEN, M.G.A. &  
1615 FREY, B. (2023). Microbial dynamics in soils of the Damma glacier forefield show succession in the  
1616 functional genetic potential. *Environmental Microbiology* **25**, 3116–3138.
- 1617 FERNÁNDEZ-MARTÍNEZ, M.A., PÉREZ-ORTEGA, S., POINTING, S.B., ALLAN GREEN, T.G., PINTADO, A.,  
1618 ROZZI, R., SANCHO, L.G. & DE LOS RÍOS, A. (2017). Microbial succession dynamics along glacier  
1619 forefield chronosequences in Tierra del Fuego (Chile). *Polar Biology* 1–19.
- 1620 FERNÁNDEZ-MENDOZA, F. & PRINTZEN, C. (2013). Pleistocene expansion of the bipolar lichen *Cetraria*  
1621 *aculeata* into the Southern hemisphere. *Molecular Ecology* **22**, 1961–1983.
- 1622 FINLAY, R.D. & THORN, R.G. (2019). The fungi in soil. In *Modern Soil Microbiology*: 65–90. Elsas, J.D.  
1623 van, Trevors, J.T., Rosado, A.S. & Nannipieri, P. (Eds.). Third edition. | Boca Raton : Taylor & Francis,  
1624 2019: CRC Press.
- 1625 FOISSNER, W. (1999). Description of Two New, Mycophagous Soil Ciliates (Ciliophora, Colpodea):  
1626 *Fungiphrya strobli* n. g., n. sp. and *Grossglockneria ovata* n. sp. *The Journal of Eukaryotic Microbiology*  
1627 **46**, 34–42.
- 1628 FONTANA, V., GUARIENTO, E., HILPOLD, A., NIEDRIST, G., STEINWANDTER, M., SPITALE, D., NASCIMBENE,  
1629 J., TAPPEINER, U. & SEEBER, J. (2020). Species richness and beta diversity patterns of multiple taxa along  
1630 an elevational gradient in pastured grasslands in the European Alps. *Scientific Reports* **10**, 12516.
- 1631 FOURNIER, B., SAMARITANI, E., FREY, B., SEPPEY, C.V.W., LARA, E., HEGER, T.J. & MITCHELL, E.A.D.  
1632 (2020). Higher spatial than seasonal variation in floodplain soil eukaryotic microbial communities. *Soil*  
1633 *Biology and Biochemistry* **147**, 107842.
- 1634 FREMSTAD, E.L.I., PAAL, J. & MOLS, T. (2005). Impacts of increased nitrogen supply on Norwegian lichen-  
1635 rich alpine communities: a 10-year experiment. *Journal of Ecology* **93**, 471–481.
- 1636 FREPPAZ, M., FILIPPA, G., CORTI, G., COCCO, S., WILLIAMS, M.W. & ZANINI, E. (2013). Soil Properties on  
1637 Ski-Runs. In *The impacts of skiing and related winter recreational activities on mountain environments*:  
1638 45–64. Rixen, C. & Rolando, A. (Eds.). Sharjah, United Arab Emirates: Bentham Science Publishers.
- 1639 FREPPAZ, M., PINTALDI, E., MAGNANI, A., VIGLIETTI, D. & WILLIAMS, M.W. (2017). Topsoil and snow: a  
1640 continuum system. *Appl. Soil Ecol.* **123**, 435–440.
- 1641 FREY, B., BÜHLER, L., SCHMUTZ, S., ZUMSTEG, A. & FURRER, G. (2013). Molecular characterization of  
1642 phototrophic microorganisms in the forefield of a receding glacier in the Swiss Alps. *Environmental*  
1643 *Research Letters* **8**, 015033.
- 1644 FREY, B., RIEDER, S.R., BRUNNER, I., PLÖTZE, M., KOETZSCH, S., LAPANJE, A., BRANDL, H. & FURRER, G.  
1645 (2010). Weathering-associated bacteria from the Damma glacier forefield: physiological capabilities and  
1646 impact on granite dissolution. *Applied and Environmental Microbiology* **76**, 4788–4796.



- 1647 FREY, B., RIME, T., PHILLIPS, M., STIERLI, B., HAJDAS, I., WIDMER, F. & HARTMANN, M. (2016). Microbial  
1648 diversity in European alpine permafrost and active layers. *FEMS Microbiology Ecology* **92**.
- 1649 FREY, B. (2021). 7 Microbial ecology of mountain permafrost: The Alps. In *Microbial Life in the*  
1650 *Cryosphere and Its Feedback on Global Change*: 153–172. Berlin, Germany: De Gruyter.
- 1651 GABRIAC, Q., GANAULT, P., BAROIS, I., ARANDA-DELGADO, E., CIMETIÈRE, E., CORTET, J., GAUTIER, M.,  
1652 HEDDE, M., MARCHÁN, D.F., PIMENTEL REYES, J.C., STOKES, A. & DECAËNS, T. (2023). Environmental  
1653 drivers of earthworm communities along an elevational gradient in the French Alps. *European Journal*  
1654 *of Soil Biology* **116**, 103477.
- 1655 GAO, Q. & YANG, Z.L. (2016). Diversity and distribution patterns of root-associated fungi on herbaceous  
1656 plants in alpine meadows of southwestern China. *Mycologia* **108**, 281–291.
- 1657 GAO, Z., KARLSSON, I., GEISEN, S., KOWALCHUK, G. & JOUSSET, A. (2019). Protists: puppet masters of the  
1658 rhizosphere microbiome. *Trends in Plant Science* **24**, 165–176.
- 1659 GARRIDO-BENAVENT, I. & PÉREZ-ORTEGA, S. (2017). Past, present, and future research in bipolar lichen-  
1660 forming fungi and their photobionts. *American Journal of Botany* **104**, 1660–1674.
- 1661 GEISEN, S., KOLLER, R., HÜNNINGHAUS, M., DUMACK, K., URICH, T. & BONKOWSKI, M. (2016). The soil  
1662 food web revisited: Diverse and widespread mycophagous soil protists. *Soil Biol. Biochem* **94**, 10–18.
- 1663 GEISEN, S., LARA, E., MITCHELL, E.A.D., VÖLCKER, E. & KRASHEVSKA, V. (2020). Soil protist life matters!  
1664 *Soil Organisms* **92**, 189–196.
- 1665 GEISEN, S., MITCHELL, E.A.D., ADL, S., BONKOWSKI, M., DUNTHORN, M., EKELUND, F., FERNÁNDEZ, L.D.,  
1666 JOUSSET, A., KRASHEVSKA, V., SINGER, D., SPIEGEL, F.W., WALOCHNIK, J. & LARA, E. (2018). Soil  
1667 protists: a fertile frontier in soil biology research. *FEMS Microbiology Reviews* **42**, 293–323.
- 1668 GEISEN, S., MITCHELL, E.A.D., WILKINSON, D.M., ADL, S., BONKOWSKI, M., BROWN, M.W., FIORE-DONNO,  
1669 A.M., HEGER, T.J., JASSEY, V.E.J., KRASHEVSKA, V., LAHR, D.J.G., MARCISZ, K., MULOT, M., PAYNE,  
1670 R., SINGER, *et al.* (2017). Soil protistology rebooted: 30 fundamental questions to start with. *Soil Biology*  
1671 *and Biochemistry* **111**, 94–103.
- 1672 GEISEN, S., ROSENGARTEN, J., KOLLER, R., MULDER, C., URICH, T. & BONKOWSKI, M. (2015). Pack hunting  
1673 by a common soil amoeba on nematodes. *Environmental Microbiology* **17**, 4538–4546.
- 1674 GENRE, A., LANFRANCO, L., PEROTTO, S. & BONFANTE, P. (2020). Unique and common traits in mycorrhizal  
1675 symbioses. *Nature Reviews Microbiology* **18**, 649–660.
- 1676 GIACCONE, E., LUOTO, M., VITTOZ, P., GUISAN, A., MARIÉTHOZ, G. & LAMBIEL, C. (2019). Influence of  
1677 microclimate and geomorphological factors on alpine vegetation in the Western Swiss Alps. *Earth*  
1678 *Surface Processes and Landforms* **44**, 3093–3107.
- 1679 GILBERT, D., AMBLARD, C., BOURDIER, G., FRANCEZ, A.J. & MITCHELL, E.A.D. (2000). Le régime  
1680 alimentaire des Thécamoebiens (Protista, Sarcodina). *L'Année Biologique* **39**, 57–68.

- 1681 GILBERT, D., AMBLARD, C., BOURDIER, G. & FRANCEZ, A.J. (1998). Short-term effect of nitrogen  
1682 enrichment on the microbial communities of a peatland. In *Oceans, Rivers and Lakes: Energy and*  
1683 *Substance Transfers at Interfaces*: 111–119. Amiard, J.C., Le Rouzic, B., Berthet, B. & Bertru, G. (Eds.).  
1684 Dordrecht, Netherlands: Springer Netherlands.
- 1685 GILD, C., GEITNER, C. & SANDERS, D. (2018). Discovery of a landscape-wide drape of late-glacial aeolian  
1686 silt in the western Northern Calcareous Alps (Austria): First results and implications. *Geomorphology*  
1687 **301**, 39–52.
- 1688 GILGADO, J.D., RUSTERHOLZ, H. & BAUR, B. (2021). Millipedes step up: species extend their upper  
1689 elevational limit in the Alps in response to climate warming. *Insect Conservation and Diversity* **15**, 61–  
1690 72.
- 1691 GILGADO, J.D., RUSTERHOLZ, H.-P., BRASCHLER, B., ZIMMERMANN, S., CHITTARO, Y. & BAUR, B. (2022).  
1692 Six groups of ground-dwelling arthropods show different diversity responses along elevational gradients  
1693 in the Swiss Alps. *PLoS ONE* **17**, e0271831.
- 1694 GLASER, F. (2006). Biogeography, diversity, and vertical distribution of ants (Hymenoptera: Formicidae)  
1695 in Vorarlberg, Austria. *Myrmecologische Nachrichten* **8**, 263–270.
- 1696 GOBBI, M., CACCIANIGA, M., COMPOSTELLA, C. & ZAPPAROLI, M. (2020). Centipede assemblages  
1697 (Chilopoda) in high-altitude landforms of the Central-Eastern Italian Alps: diversity and abundance.  
1698 *Rendiconti Lincei. Scienze Fisiche e Naturali* **31**, 1071–1087.
- 1699 GOLD, W.G., GLEW, K.A. & DICKSON, L.G. (2001). Functional influences of cryptobiotic surface crusts in  
1700 an Alpine tundra basin of the Olympic Mountains, Washington, U.S.A. *Northwest Science* **75**, 75.
- 1701 GOLOVATCH, S.I. (2015). On several new or poorly-known Oriental Paradoxosomatidae (Diplopoda:  
1702 Polydesmida), XVII. *Arthropoda Selecta* **24**, 127–168.
- 1703 GÓMEZ, G., SESÉ, J.A. & VILLAR, L. (2003). The Vegetation of the Alpine Zone in the Pyrenees. In *Alpine*  
1704 *Biodiversity in Europe*, Ecological Studies: 85–92. Nagy, L., Grabherr, G., Körner, C. & Thompson,  
1705 D.B.A. (Eds.). Berlin, Germany: Springer Springer-Verlag Berlin Heidelberg.
- 1706 GOORDIAL, J., DAVILA, A., LACELLE, D., POLLARD, W., MARINOVA, M.M., GREER, C.W., DIRUGGIERO, J.,  
1707 MCKAY, C.P. & WHYTE, L.G. (2016). Nearing the cold-arid limits of microbial life in permafrost of an  
1708 upper dry valley, Antarctica. *The ISME Journal* **10**, 1613–1624.
- 1709 GRABHERR, G. (1982). The impact of trampling by tourists on a high altitudinal grassland in the Tyrolean  
1710 Alps, Austria. *Vegetatio* **48**, 209–217.
- 1711 GRAF, F. & BRUNNER, I. (1996). Natural and synthesized ectomycorrhizas of the alpine dwarf willow *Salix*  
1712 *herbacea*. *Mycorrhiza* **6**, 227–235.
- 1713 GRAF, F. (1994). *Ecology and sociology of macromycetes in snow-beds with Salix herbacea L. in the alpine*  
1714 *Valley of Radönt (Grisons, Switzerland)*. Undergraduate thesis, ETH Zurich.

- 1715 GRAGLIA, E., JONASSON, S., MICHELSEN, A., SCHMIDT, I.K., HAVSTRÖM, M. & GUSTAVSSON, L. (2001).  
1716 Effects of environmental perturbations on abundance of subarctic plants after three, seven and ten years  
1717 of treatments. *Ecography* **24**, 5–12.
- 1718 GREENSLADE, P. & FJELLBERG, A. (2015). *Skadisotoma*, a new genus of Isotomidae (Collembola) from  
1719 Australia. *Zootaxa* **3972**, 573–580.
- 1720 GREEN, K. & SLATYER, R. (2020). Arthropod community composition along snowmelt gradients in  
1721 snowbeds in the Snowy Mountains of south-eastern Australia. *Austral Ecology* **45**, 144–157.
- 1722 GROS, R., JOCTEUR MONROZIER, L., BARTOLI, F., CHOTTE, J.L. & FAIVRE, P. (2004). Relationships between  
1723 soil physico-chemical properties and microbial activity along a restoration chronosequence of alpine  
1724 grasslands following ski run construction. *Applied Soil Ecology* **27**, 7–22.
- 1725 GUARIENTO, E. & FIEDLER, K. (2021). Ant diversity and community composition in alpine tree line  
1726 ecotones. *Insects* **12**, 219.
- 1727 GUARIENTO, E., MARTINI, J. & FIEDLER, K. (2018). Bait visitation by *Formica lemani* (Hymenoptera:  
1728 Formicidae) indicates shortage of carbohydrates in alpine grasslands. *European Journal of Entomology*  
1729 **115**, 217–222.
- 1730 GUARIENTO, E., WANEK, W. & FIEDLER, K. (2021). Consistent shift in nutritional ecology of ants reveals  
1731 trophic flexibility across alpine tree-line ecotones. *Ecological Entomology* **46**, 1082–1092.
- 1732 GUERRA, C.A., BARDGETT, R.D., CAON, L., CROWTHER, T.W., DELGADO-BAQUERIZO, M.,  
1733 MONTANARELLA, L., NAVARRO, L.M., ORGIAZZI, A., SINGH, B.K., TEDERSOO, L., VARGAS-ROJAS, R.,  
1734 BRIONES, M.J.I., BUSCOT, F., CAMERON, E.K., CESARZ, S., *et al.* (2021). Tracking, targeting, and  
1735 conserving soil biodiversity. *Science* **371**, 239–241.
- 1736 GUERRA, C.A., BERDUGO, M., ELDRIDGE, D.J., EISENHAEUER, N., SINGH, B.K., CUI, H., ABADES, S., ALFARO,  
1737 F.D., BAMIGBOYE, A.R., BASTIDA, F., BLANCO-PASTOR, J.L., DE LOS RÍOS, A., DURÁN, J., GREBENC, T.,  
1738 ILLÁN, J.G., *et al.* (2022). Global hotspots for soil nature conservation. *Nature* **610**, 693–698.
- 1739 GUERRA, C.A., HEINTZ-BUSCHART, A., SIKORSKI, J., CHATZINOTAS, A., GUERRERO-RAMÍREZ, N., CESARZ,  
1740 S., BEAUMELLE, L., RILLIG, M.C., MAESTRE, F.T., DELGADO-BAQUERIZO, M., BUSCOT, F., OVERMANN,  
1741 J., PATOINE, G., PHILLIPS, H.R.P., WINTER, M., *et al.* (2020). Blind spots in global soil biodiversity and  
1742 ecosystem function research. *Nature Communication* **11**, 3870.
- 1743 GUIBAN, A.A., BROENNIMANN, O., BURI, A., CIANFRANI, C., D'AMEN, M., DI COLA, V., FERNANDES, R.,  
1744 GRAY, S.M., MATEO, R.G., PINTO, E., PRADERVAND, J.-N., SCHERRER, D., VITTOZ, P., VON DÄNIKEN, I.  
1745 & YASHIRO, E. (2019). Climate change impacts on mountain biodiversity. In *Biodiversity and climate*  
1746 *change: transforming the biosphere*: 221–233. Lovejoy, T.E. & Hannah, L. (Eds.). New Haven, CT:  
1747 Yale University Press.

- 1748 GUO, G., KONG, W., LIU, J., ZHAO, J., DU, H., ZHANG, X. & XIA, P. (2015). Diversity and distribution of  
1749 autotrophic microbial community along environmental gradients in grassland soils on the Tibetan  
1750 Plateau. *Applied Microbiology and Biotechnology* **99**, 8765–8776.
- 1751 GUO, S.L. & CAO, T. (2001). Distribution Patterns of Ground Moss Species and Its Relationships with  
1752 Environmental Factors in Changbai Mountain, Northeast China. *Journal of Integrative Plant Biology*  
1753 **43**, 631–643.
- 1754 HAGEDORN, F., GAVAZOV, K. & ALEXANDER, J.M. (2019). Above- and belowground linkages shape  
1755 responses of mountain vegetation to climate change. *Science* **365**, 1119–1123.
- 1756 HÅGVAR, S., GOBBI, M., KAUFMANN, R., INGIMARSDÓTTIR, M., CACCIANIGA, M., VALLE, B., PANTINI, P.,  
1757 FANCIULLI, P.P. & VATER, A. (2020). Ecosystem Birth Near Melting Glaciers: A Review on the Pioneer  
1758 Role of Ground-Dwelling Arthropods. *Insects* **11**, 644.
- 1759 HALLOY, S. (1991). Islands of life at 6000 m altitude: the environment of the highest autotrophic  
1760 communities on earth (socompa volcano, andes). *Arctic and Alpine Research* **23**, 247.
- 1761 HALSEY, L.A., VITT, D.H. & GIGNAC, L.D. (2000). *Sphagnum*-dominated Peatlands in North America Since  
1762 the Last Glacial Maximum: Their Occurrence and Extent. *Bryologist* **103**, 334–352.
- 1763 HAMMER, M., FOGED, N. & NØRVANG, A. (1966). Investigations on the oribatid fauna of New Zealand.  
1764 *Biologiske Skrifter* **15**.
- 1765 HARSCH, M.A., HULME, P.E., MCGLONE, M.S. & DUNCAN, R.P. (2009). Are treelines advancing? A global  
1766 meta-analysis of treeline response to climate warming. *Ecology Letters* **12**, 1040–1049.
- 1767 HARTE, J., RAWA, A. & PRICE, V. (1996). Effects of manipulated soil microclimate on mesofaunal biomass  
1768 and diversity. *Soil Biology and Biochemistry* **28**, 313–322.
- 1769 HAUCK, M., DULAMSUREN, C., BAYARTOGTOKH, B., ULYKPAN, K., BURKITBAEVA, U.D., OTGONJARGAL, E.,  
1770 TITOV, S.V., ENKHBAYAR, T., SUNDETPAEV, A.K., BEKET, U. & LEUSCHNER, C. (2014). Relationships  
1771 between the diversity patterns of vascular plants, lichens and invertebrates in the Central Asian forest-  
1772 steppe ecotone. *Biodiversity and Conservation* **23**, 1105–1117.
- 1773 HAUGWITZ, M.S. & MICHELSEN, A. (2011). Long-term addition of fertilizer, labile carbon, and fungicide  
1774 alters the biomass of plant functional groups in a subarctic-alpine community. *Plant Ecology* **212**, 715–  
1775 726.
- 1776 HAWKSWORTH, D.L. & LÜCKING, R. (2017). Fungal diversity revisited: 2.2 to 3.8 million species.  
1777 *Microbiology Spectrum* **5**.
- 1778 HEGER, T.J., DERUNGS, N., THEURILLAT, J.P. & MITCHELL, E.A.D. (2016). Testate Amoebae Like It Hot:  
1779 Species Richness Decreases Along a Subalpine-Alpine Altitudinal Gradient in Both Natural *Calluna*  
1780 *vulgaris* Litter and Transplanted *Minuartia sedoides* Cushions. *Microbial Ecology* **71**, 725–734.
- 1781 HESLING, E. & TAYLOR, A.F.S. (2013). Ectomycorrhizal fungi associated with *Arctostaphylos usva-ursi* in  
1782 Scotland: Exploring the biogeography of undiscovered fungal communities. *Karstenia* **53**, 39–47.

- 1783 HESTMARK, G., SKOGESAL, O. & SKULLERUD, Ø. (2007). Early recruitment equals long-term relative  
1784 abundance in an alpine saxicolous lichen guild. *Mycologia* **99**, 207–214.
- 1785 HILL, K.B.R., SIMON, C., MARSHALL, D.C. & CHAMBERS, G.K. (2009). Surviving glacial ages within the  
1786 Biotic Gap: phylogeography of the New Zealand cicada *Maoricicada campbelli*. *Journal of*  
1787 *Biogeography* **36**, 675–692.
- 1788 HOCHKIRCH, A., SAMWAYS, M.J., GERLACH, J., BÖHM, M., WILLIAMS, P., CARDOSO, P., CUMBERLIDGE, N.,  
1789 STEPHENSON, P.J., SEDDON, M.B., CLAUSNITZER, V., BORGES, P.A.V., MUELLER, G.M., PEARCE-KELLY,  
1790 P., RAIMONDO, D.C., DANIELCZAK, A. & DIJKSTRA, K.-D.B. (2021). A strategy for the next decade to  
1791 address data deficiency in neglected biodiversity. *Conservation Biology* **35**, 502–509.
- 1792 HODGETTS, N., CALIX, M., ENGLEFIELD, E., FETTES, N., GARCÍA CRIADO, M., PATIN, L., NIETO, A.,  
1793 BERGAMINI, A., BISANG, I., BAISHEVA, E. & ŻARNOWIEC, J. (2019). *A miniature world in decline:*  
1794 *European Red List of Mosses, Liverworts and Hornworts*. IUCN, International Union for Conservation  
1795 of Nature.
- 1796 HOFMANN, K., REITSCHULER, C. & ILLMER, P. (2013). Aerobic and anaerobic microbial activities in the  
1797 foreland of a receding glacier. *Soil Biology and Biochemistry* **57**, 418–426.
- 1798 VAN DEN HOOGEN, J., GEISEN, S., ROUTH, D., FERRIS, H., TRAUNSPURGER, W., WARDLE, D.A., DE GOEDE,  
1799 R.G.M., ADAMS, B.J., AHMAD, W., ANDRIUZZI, W.S., BARDGETT, R.D., BONKOWSKI, M., CAMPOS-  
1800 HERRERA, R., CARES, J.E., CARUSO, T., *et al.* (2019). Soil nematode abundance and functional group  
1801 composition at a global scale. *Nature* **572**, 194–198.
- 1802 HOORN, C., PERRIGO, A. & ANTONELLI, A. (2018). *Mountains, Climate and Biodiversity*. 1st edn. Hoboken,  
1803 NJ: Wiley-Blackwell.
- 1804 HOPKIN, S.P. (1997). *Biology of Springtails (Insecta: Collembola)*. 1st edn. Oxford, UK: Oxford University  
1805 Press.
- 1806 HORAK, E. (1993). Entoloma in the alpine zone of the Alps 1 Revision of the taxa described by J Favre 2  
1807 New records from the Swiss National Park and other locations in the Alps. *Petrini, O , Laursen, G A*  
1808 *Bibliotheca Mycologica; Arctic and Alpine Mycology* **3–4**, 63–91.
- 1809 HOUSTON, W.W.K. & GREENSLADE, P.J.M. (1994). *Zoological Catalogue of Australia, Volume 22. Protura,*  
1810 *Collembola, Diplura*. CSIRO Publishing.
- 1811 HUBER, K., PEER, T., TSCHAIKNER, A., TÜRK, R. & GRUBER, J.P. (2007). Characteristics and function of soil  
1812 crusts in different successional stages in alpine environments, outlined on an alpine lime scree in the  
1813 Großglockner region (Austria). *Mitteilungen der Österrichischen Bodenkundlichen Gesellschaft* **74**,  
1814 111–126.
- 1815 HUG, L.A., BAKER, B.J., ANANTHARAMAN, K., BROWN, C.T., PROBST, A.J., CASTELLE, C.J., BUTTERFIELD,  
1816 C.N., HERNSDORF, A.W., AMANO, Y., ISE, K., SUZUKI, Y., DUDEK, N., RELMAN, D.A., FINSTAD, K.M.,  
1817 AMUNDSON, R., *et al.* (2016). A new view of the tree of life. *Nature Microbiology* **1**, 16048.

- 1818 HU, J., CHEN, G., HASSAN, W.M., CHEN, H., LI, J. & DU, G. (2017). Fertilization influences the nematode  
1819 community through changing the plant community in the Tibetan Plateau. *European Journal of Soil*  
1820 *Biology* **78**, 7–16.
- 1821 HU, Z., YAO, J., CHEN, X., GONG, X., ZHANG, Y., ZHOU, X., GUO, H. & LIU, M. (2022). Precipitation  
1822 changes, warming, and N input differentially affect microbial predators in an alpine meadow: Evidence  
1823 from soil phagotrophic protists. *Soil Biology and Biochemistry* **165**, 108521.
- 1824 INTERGOVERNMENTAL SCIENCE-POLICY PLATFORM ON BIODIVERSITY AND ECOSYSTEM SERVICES (2018).  
1825 The IPBES assessment report on land degradation and restoration. *Zenodo* 744.
- 1826 ISELI, E., CHISHOLM, C., LENOIR, J., HAIDER, S., SEIPEL, T., BARROS, A., HARGREAVES, A.L., KARDOL, P.,  
1827 LEMBRECHTS, J.J., MCDUGALL, K., RASHID, I., RUMPF, S.B., ARÉVALO, J.R., CAVIERES, L., DAEHLER,  
1828 C., *et al.* (2023). Rapid upwards spread of non-native plants in mountains across continents. *Nature*  
1829 *Ecology Evolution* **7**, 405–413.
- 1830 JÄGERBRAND, A.K. & ALATALO, J.M. (2015). Effects of human trampling on abundance and diversity of  
1831 vascular plants, bryophytes and lichens in alpine heath vegetation, Northern Sweden. *Springerplus* **4**,  
1832 95.
- 1833 JANATKOVÁ, K., REHÁKOVÁ, K., DOLEŽAL, J., SIMEK, M., CHLUMSKÁ, Z., DVORSKÝ, M. & KOPECKÝ, M.  
1834 (2013). Community structure of soil phototrophs along environmental gradients in arid Himalaya.  
1835 *Environmental Microbiology* **15**, 2505–2516.
- 1836 JANIŠOVÁ, M., BARTHA, S., KIEHL, K. & DENGLER, J. (2011). Advances in the conservation of dry  
1837 grasslands: Introduction to contributions from the seventh European Dry Grassland Meeting. *Plant*  
1838 *Biosystems - An International Journal Dealing with all Aspects of Plant Biology* **145**, 507–513.
- 1839 JASSEY, V.E.J., MEYER, C., DUPUY, C., BERNARD, N., MITCHELL, E.A.D., TOUSSAINT, M.-L., METIAN, M.,  
1840 CHATELAIN, A.P. & GILBERT, D. (2013). To what extent do food preferences explain the trophic position  
1841 of heterotrophic and mixotrophic microbial consumers in a Sphagnum peatland? *Microbiological*  
1842 *Ecology* **66**, 571–580.
- 1843 JASSEY, V.E.J., WALCKER, R., KARDOL, P., GEISEN, S., HEGER, T., LAMENTOWICZ, M., HAMARD, S. & LARA,  
1844 E. (2022). Contribution of soil algae to the global carbon cycle. *New Phytologist* **234**, 64–76.
- 1845 JÁSZAYOVÁ, A., JÁSZAY, T., CHOVANCOVÁ, G., CSANÁDY, A., HURNÍKOVÁ, Z. & ZWIJACZ-KOZICA, T.  
1846 (2023). Distribution and biodiversity of the beetle population (Coleoptera) in the alpine ecosystem of  
1847 the Tatra National Park. *Biologia* **78**, 2765–2778.
- 1848 JESPERSEN, R.G. (2013). *Experimental investigations into the ecological functions of cryptogams in alpine*  
1849 *plant communities*. Undergraduate thesis, University of Washington.
- 1850 JIANG, S., LIU, Y., LUO, J., QIN, M., JOHNSON, N.C., ÖPIK, M., VASAR, M., CHAI, Y., ZHOU, X., MAO, L., DU,  
1851 G., AN, L. & FENG, H. (2018). Dynamics of arbuscular mycorrhizal fungal community structure and

- 1852 functioning along a nitrogen enrichment gradient in an alpine meadow ecosystem. *New Phytologist* **220**,  
1853 1222–1235.
- 1854 JIANG, Y., YIN, X. & WANG, F. (2015). Composition and spatial distribution of soil mesofauna along an  
1855 elevation gradient on the north slope of the Changbai Mountains, China. *Pedosphere* **25**, 811–824.
- 1856 JIANG, Y., ZHANG, D., OSTLE, N.J., LUO, C., WANG, Y., DING, P., CHENG, Z., SHEN, C. & ZHANG, G. (2021).  
1857 Flexible soil microbial carbon metabolism across an Asian elevation gradient. *Radiocarbon* **63**, 1397–  
1858 1413.
- 1859 JIN, X.-Y., JIN, H.-J., IWAHANA, G., MARCHENKO, S.S., LUO, D.-L., LI, X.-Y. & LIANG, S.-H. (2020).  
1860 Impacts of climate-induced permafrost degradation on vegetation: A review. *Advances in Climate*  
1861 *Change Research*.
- 1862 JI, M., KONG, W., STEGEN, J., YUE, L., WANG, F., DONG, X., COWAN, D.A. & FERRARI, B.C. (2020). Distinct  
1863 assembly mechanisms underlie similar biogeographical patterns of rare and abundant bacteria in Tibetan  
1864 Plateau grassland soils. *Environmental Microbiology* **22**, 2261–2272.
- 1865 JOHNSTON, F.M. & PICKERING, C.M. (2001). Alien plants in the Australian Alps. *Mountain Research and*  
1866 *Development* **21**, 284–291.
- 1867 JOHNSTON, P.R., QUIJADA, L., SMITH, C.A., BARAL, H.-O., HOSOYA, T., BASCHIEN, C., PÄRTEL, K.,  
1868 ZHUANG, W.-Y., HAELEWATERS, D., PARK, D., CARL, S., LÓPEZ-GIRÁLDEZ, F., WANG, Z. & TOWNSEND,  
1869 J.P. (2019). A multigene phylogeny toward a new phylogenetic classification of Leotiomycetes. *IMA*  
1870 *Fungus* **10**, 1.
- 1871 JOUSSET, A., BIENHOLD, C., CHATZINOTAS, A., GALLIEN, L., GOBET, A., KURM, V., KÜSEL, K., RILLIG, M.C.,  
1872 RIVETT, D.W., SALLES, J.F., VAN DER HEIJDEN, M.G.A., YOUSSEF, N.H., ZHANG, X., WEI, Z. & HOL,  
1873 W.H.G. (2017). Where less may be more: how the rare biosphere pulls ecosystems strings. *The ISME*  
1874 *Journal* **11**, 853–862.
- 1875 JUMPPONEN, A., BROWN, S., TRAPPE, J., CÁZARES, E. & STRÖMMER, R. (2015). Analyses of Sporocarps,  
1876 Morphotyped Ectomycorrhizae, Environmental ITS and LSU Sequences Identify Common Genera that  
1877 Occur at a Periglacial Site. *Journal of Fungi* **1**, 76–93.
- 1878 JUNG, P., BRIEGEL-WILLIAMS, L., SIMON, A., THYSSEN, A. & BÜDEL, B. (2018). Uncovering biological soil  
1879 crusts: carbon content and structure of intact Arctic, Antarctic and alpine biological soil crusts.  
1880 *Biogeosciences* **15**, 1149–1160.
- 1881 KANG, L., CHEN, L., ZHANG, D., PENG, Y., SONG, Y., KOU, D., DENG, Y. & YANG, Y. (2022). Stochastic  
1882 processes regulate belowground community assembly in alpine grasslands on the Tibetan Plateau.  
1883 *Environmental Microbiology* **24**, 179–194.
- 1884 KARSTEN, U. & HOLZINGER, A. (2014). Green algae in alpine biological soil crust communities: acclimation  
1885 strategies against ultraviolet radiation and dehydration. *Biodiversity and Conservation* **23**, 1845–1858.

- 1886 KAUFMANN, R., FUCHS, M. & GOSTERXEIER, N. (2002). The soil fauna of an alpine glacier foreland:  
1887 colonization and succession. *Arctic, Antarctic, and Alpine Research* **34**, 242–250.
- 1888 KERNAGHAN, G. & HARPER, K.A. (2001). Community structure of ectomycorrhizal fungi across an  
1889 alpine/subalpine ecotone. *Ecography* **24**, 181–188.
- 1890 KHABIR, Z.H., NEJAD, K.H.I., MOGHADDAM, M. & KHANJANI, M. (2015). Community structure of oribatid  
1891 mites (Acari: Oribatida) in rangelands of West Azerbaijan Province, Iran. *International Journal of*  
1892 *Acarology* **41**, 344–355.
- 1893 KING, A.J., FREEMAN, K.R., MCCORMICK, K.F., LYNCH, R.C., LOZUPONE, C., KNIGHT, R. & SCHMIDT, S.K.  
1894 (2010). Biogeography and habitat modelling of high-alpine bacteria. *Nature Communication* **1**, 53.
- 1895 KING, K.J., LEWIS, D.M., WATERS, J.M. & WALLIS, G.P. (2020). Persisting in a glaciated landscape:  
1896 Pleistocene microrefugia evidenced by the tree wētā *Hemideina maori* in central South Island, New  
1897 Zealand. *Journal of Biogeography* **47**, 2518–2531.
- 1898 KITZ, F., STEINWANDTER, M., TRAUGOTT, M. & SEEBER, J. (2015). Increased decomposer diversity  
1899 accelerates and potentially stabilises litter decomposition. *Soil Biology and Biochemistry*. **83**, 138–141.
- 1900 KITZING, C., PRÖSCHOLD, T. & KARSTEN, U. (2014). UV-induced effects on growth, photosynthetic  
1901 performance and sunscreen contents in different populations of the green alga *Klebsormidium fluitans*  
1902 (Streptophyta) from alpine soil crusts. *Microbiological Ecology* **67**, 327–340.
- 1903 KIVLIN, S.N., LYNN, J.S., KAZENEL, M.R., BEALS, K.K. & RUDGERS, J.A. (2017). Biogeography of plant-  
1904 associated fungal symbionts in mountain ecosystems: A meta-analysis. *Diversity and Distribution* **23**,  
1905 1067–1077.
- 1906 KLANDERUD, K. (2008). Species-specific responses of an alpine plant community under simulated  
1907 environmental change. *Journal of Vegetation Science* **19**, 363–372.
- 1908 KLEIN, J.A., TUCKER, C.M., NOLIN, A.W., HOPPING, K.A., REID, R.S., STEGER, C., GRÊT-REGAMEY, A.,  
1909 LAVOREL, S., MÜLLER, B., YEH, E.T., BOONE, R.B., BOURGERON, P., BUTSIC, V., CASTELLANOS, E.,  
1910 CHEN, X., *et al.* (2019). Catalyzing transformations to sustainability in the world's mountains. *Earth's*  
1911 *Future* **7**, 547–557.
- 1912 KOCH, E.-M. & ERSCHBAMER, B. (2010). *Glaziale Und Periglaziale Lebensräume Im Raum Obergurgl*.  
1913 Innsbruck: Innsbruck University Press.
- 1914 KOCH, E.-M. & KAUFMANN, R. (2010). Kapitel 7 | Die tierische Besiedlung von Gletschermoränen. In  
1915 *Glaziale und periglaziale Lebensräume im Raum Obergurgl*: 165–183. Koch, E.-M. & Erschbamer, B.  
1916 (Eds.). Innsbruck, Austria: Innsbruck University Press.
- 1917 KOKHIA, M.S. & GOLOVATCH, S.I. (2020). Diversity and distribution of the millipedes (Diplopoda) of  
1918 Georgia, Caucasus. *Zookeys* **930**, 199–219.
- 1919 KOMPOSCH, C. (2011). Endemic harvestmen and spiders of Austria (Arachnida: Opiliones, Araneae).  
1920 *Arachnologische Mitteilungen* **40**, 65–79.



- 1921 KÖNIG, T., KAUFMANN, R. & SCHEU, S. (2011). The formation of terrestrial food webs in glacier foreland:  
1922 Evidence for the pivotal role of decomposer prey and intraguild predation. *Pedobiologia* **54**, 147–152.
- 1923 KOOCH, Y. & NOGHRE, N. (2020). The effect of shrubland and grassland vegetation types on soil fauna and  
1924 flora activities in a mountainous semi-arid landscape of Iran. *Science of the Total Environment* **703**,  
1925 135497.
- 1926 KOOCH, Y., SHAH PIRI, A. & DIANATI TILAKI, G.A. (2021). Conversion of forest to rangelands suppress soil  
1927 fauna and flora densities during long-term in mountain ecosystems. *Ecological Engineering* **165**,  
1928 106241.
- 1929 KOPESZKI, H. & TROCKNER, V. (1994). Effects of skiing on the Collembolan fauna of an alpine meadow in  
1930 Gröden (South Tyrol). *Zoologischer Anzeiger* **244**, 221–239.
- 1931 KÖRNER, C., JETZ, W., PAULSEN, J., PAYNE, D., RUDMANN-MAURER, K. & M. SPEHN, E. (2017). A global  
1932 inventory of mountains for bio-geographical applications. *Alpine Botany* **127**, 1–15.
- 1933 KÖRNER, C. (2021). *Alpine Plant Life: functional plant ecology of high mountain ecosystems*. 3rd edn.  
1934 Cham, Switzerland: Springer International Publishing.
- 1935 KRASHEVSKA, V., BONKOWSKI, M., MARAUN, M. & SCHEU, S. (2007). Testate amoebae (protista) of an  
1936 elevational gradient in the tropical mountain rain forest of Ecuador. *Pedobiologia* **51**, 319–331.
- 1937 KRASHEVSKA, V., MARAUN, M. & SCHEU, S. (2010). Micro- and macroscale changes in density and  
1938 diversity of testate amoebae of tropical montane rain forests of Southern Ecuador. *Acta Protozoologica*  
1939 **2010**, 17–28.
- 1940 KRISAI-GREILHUBER, I., CHEN, Y., JABEEN, S., MADRID, H., MARINCOWITZ, S., RAZAQ, A., ŠEVČÍKOVÁ, H.,  
1941 VOGLMAYR, H., YAZICI, K., APTROOT, A., ASLAN, A., BOEKHOUT, T., BOROVÍČKA, J., CROUS, P.W.,  
1942 ILYAS, S., *et al.* (2017). Fungal systematics and evolution: FUSE 3. *Sydowia* **69**, 229–264.
- 1943 KRPATA, D., MÜHLMANN, O., KUHNERT, R., LADURNER, H., GÖBL, F. & PEINTNER, U. (2007). High diversity  
1944 of ectomycorrhizal fungi associated with *Arctostaphylos uva-ursi* in subalpine and alpine zones:  
1945 Potential inoculum for afforestation. *Forest Ecology and Management* **250**, 167–175.
- 1946 LAMENTOWICZ, M., BRAGAZZA, L., BUTTLER, A., JASSEY, V.E.J. & MITCHELL, E.A.D. (2013). Seasonal  
1947 patterns of testate amoeba diversity, community structure and species–environment relationships in four  
1948 Sphagnum-dominated peatlands along a 1300 m altitudinal gradient in Switzerland. *Soil Biology and*  
1949 *Biochemistry* **67**, 1–11.
- 1950 LARSEN, T.H. (2012). Upslope Range Shifts of Andean Dung Beetles in Response to Deforestation:  
1951 Compounding and Confounding Effects of Microclimatic Change. *Biotropica* **44**, 82–89.
- 1952 LAVELLE, P., MATHIEU, J., SPAIN, A., BROWN, G., FRAGOSO, C., LAPIED, E., DE AQUINO, A., BAROIS, I.,  
1953 BARRIOS, E., BARROS, M.E., BEDANO, J.C., BLANCHART, E., CAULFIELD, M., CHAGUEZA, Y., DAI, J., *ET*  
1954 *AL.* (2022). Soil macroinvertebrate communities: A world-wide assessment. *Global Ecology and*  
1955 *Biogeography*, **31**, 1261–1276.

- 1956 LAZZARO, A., HILFIKER, D. & ZEYER, J. (2015). Structures of microbial communities in alpine soils:  
1957 seasonal and elevational effects. *Frontiers in Microbiology* **6**, 1330.
- 1958 LETENDRE, A.-C., COXSON, D.S. & STEWART, K.J. (2019). Restoration of Ecosystem Function by Soil  
1959 Surface Inoculation with Biocrust in Mesic and Xeric Alpine Ecosystems. *Ecological Restoration* **37**,  
1960 101–112.
- 1961 LETT, S., TEUBER, L.M., KRAB, E.J., MICHELSEN, A., OLOFSSON, J., NILSSON, M.-C., WARDLE, D.A. &  
1962 DORREPAAL, E. (2020). Mosses modify effects of warmer and wetter conditions on tree seedlings at the  
1963 alpine treeline. *Global Change Biology* **26**, 5754–5766.
- 1964 LEUSCHNER, C. & ELLENBERG, H. (2017). Vegetation of the Alpine and Nival Belts. In *Ecology of Central*  
1965 *European Non-Forest Vegetation: Coastal to Alpine, Natural to Man-Made Habitats*: 271–431. Cham,  
1966 Switzerland: Springer International Publishing.
- 1967 LIANG, Q., MOD, H.K., LUO, S., MA, B., YANG, K., CHEN, B., QI, W., ZHAO, Z., DU, G., GUIBAN, A., MA, X.  
1968 & LE ROUX, X. (2023). Taxonomic and functional biogeographies of soil bacterial communities across  
1969 the Tibet plateau are better explained by abiotic conditions than distance and plant community  
1970 composition. *Molecular Ecology* **32**, 3747–3762.
- 1971 LIEBHERR, J.K., MARRIS, J.W.M., EMBERSON, R.M., SYRETT, P. & ROIG-JUÑENT, S. (2011). *Orthoglymma*  
1972 *wangapeka* gen.n., sp.n. (Coleoptera: Carabidae: Broscini): a newly discovered relict from the Buller  
1973 Terrane, north-western South Island, New Zealand, corroborates a general pattern of Gondwanan  
1974 endemism. *Systematic Entomology* **36**, 395–414.
- 1975 VAN DER LINDE, S., SUZ, L.M., ORME, C.D.L., COX, F., ANDREA, H., ASI, E., ATKINSON, B., BENHAM, S.,  
1976 CARROLL, C., COOLS, N., DE VOS, B., DIETRICH, H.-P., EICHHORN, J., GEHRMANN, J., GREBENC, T., *et al.*  
1977 (2018). Environment and host as large-scale controls of ectomycorrhizal fungi. *Nature* **558**, 243–248.
- 1978 LIPSON, D.A. & SCHMIDT, S.K. (2004). Seasonal changes in an alpine soil bacterial community in the  
1979 colorado rocky mountains. *Appl. Environmental Microbiology* **70**, 2867–2879.
- 1980 LIU, G., SUN, J., TIAN, K., YUAN, X., AN, S. & WANG, H. (2017). Litter decomposition of emergent plants  
1981 along an elevation gradient in wetlands of Yunnan Plateau, China. *Chinese Geographical Science* **27**,  
1982 760–771.
- 1983 LI, G., WILSCHUT, R.A., LUO, S., CHEN, H., WANG, X., DU, G. & GEISEN, S. (2023). Nematode biomass  
1984 changes along an elevational gradient are trophic group dependent but independent of body size. *Global*  
1985 *Change Biology* **29**, 4898–4909.
- 1986 LI, Y., OUYANG, J., LIN, L., XU, X., ZHANG, F., DU, Y., LIU, S., CAO, G. & HAN, F. (2016). Alterations to  
1987 biological soil crusts with alpine meadow retrogressive succession affect seeds germination of three  
1988 plant species. *Journal of Mountain Science* **13**, 1995–2005.
- 1989 LONGTON, R.E. (1988). *Biology of Polar Bryophytes and Lichens (Studies in Polar Research)*. 1st edn.  
1990 Cambridge, UK: Cambridge University Press.

- 1991 LUDLEY, K.E. & ROBINSON, C.H. (2008). ‘Decomposer’ Basidiomycota in Arctic and Antarctic ecosystems.  
1992 *Soil Biology and Biochemistry* **40**, 11–29.
- 1993 LULÁKOVÁ, P., PEREZ-MON, C., ŠANTRŮČKOVÁ, H., RUETHI, J. & FREY, B. (2019). High-Alpine Permafrost  
1994 and Active-Layer Soil Microbiomes Differ in Their Response to Elevated Temperatures. *Frontiers in*  
1995 *Microbiology* **10**, 668.
- 1996 LÜTZ, C. (Ed.). (2012). *Plants in Alpine Regions: Cell Physiology of Adaption and Survival Strategies*.  
1997 Vienna, Austria: Springer Vienna.
- 1998 MACHAC, A., JANDA, M., DUNN, R.R. & SANDERS, N.J. (2011). Elevational gradients in phylogenetic  
1999 structure of ant communities reveal the interplay of biotic and abiotic constraints on diversity. *Ecography*  
2000 **34**, 364–371.
- 2001 MAESTRE, F.T. & EISENHAEUER, N. (2019). Recommendations for establishing global collaborative networks  
2002 in soil ecology. *Soil Organisms* **91**, 73–85.
- 2003 MAHARACHCHIKUMBURA, S.S.N., HYDE, K.D., JONES, E.B.G., MCKENZIE, E.H.C., BHAT, J.D.,  
2004 DAYARATHNE, M.C., HUANG, S.-K., NORPHANPHOUN, C., SENANAYAKE, I.C., PERERA, R.H., SHANG, Q.-  
2005 J., XIAO, Y., D’SOUZA, M.J., HONGSANAN, S., JAYAWARDENA, R.S., *et al.* (2016). Families of  
2006 Sordariomycetes. *Fungal Diversity* **79**, 1–317.
- 2007 MAHÉ, F., DE VARGAS, C., BASS, D., CZECH, L., STAMATAKIS, A., LARA, E., SINGER, D., MAYOR, J., BUNGE,  
2008 J., SERNAKER, S., SIEMENSMEYER, T., TRAUTMANN, I., ROMAC, S., BERNEY, C., KOZLOV, A., *et al.* (2017).  
2009 Parasites dominate hyperdiverse soil protist communities in Neotropical rainforests. *Nature Ecology and*  
2010 *Evolution* **1**, 91.
- 2011 MAIENZA, A., BARONTI, S., LANINI, G.M., UGOLINI, F., UNGARO, F. & VACCARI, F.P. (2022). The QBS-ar  
2012 Index: a Sensitive Tool to Assess the Effectiveness of an Agroecological Practice in the Italian Alpine  
2013 Region. *Journal of Soil Science and Plant Nutrition* **22**, 3740–3744.
- 2014 MAIER, S., TAMM, A., WU, D., CAESAR, J., GRUBE, M. & WEBER, B. (2018). Photoautotrophic organisms  
2015 control microbial abundance, diversity, and physiology in different types of biological soil crusts. *The*  
2016 *ISME Journal* **12**, 1032–1046.
- 2017 MALARD, L.A., MOD, H.K., GUEX, N., BROENNIMANN, O., YASHIRO, E., LARA, E., MITCHELL, E.A.D.,  
2018 NICULITA-HIRZEL, H. & GUISAN, A. (2022). Comparative analysis of diversity and environmental niches  
2019 of soil bacterial, archaeal, fungal and protist communities reveal niche divergences along environmental  
2020 gradients in the Alps. *Soil Biology and Biochemistry* **169**, 108674.
- 2021 MALARD, L.A. & PEARCE, D.A. (2018). Microbial diversity and biogeography in Arctic soils.  
2022 *Environmental Microbiology Rep.* **10**, 611–625.
- 2023 MALLEEN-COOPER, M., GRAAE, B.J. & CORNWELL, W.K. (2021). Lichens buffer tundra microclimate more  
2024 than the expanding shrub *Betula nana*. *Annals of Botany* **128**, 407–418.

- 2025 MANN, D.H., EDWARDS, J.S. & GARA, R.I. (1980). Diel activity patterns in snowfield foraging invertebrates  
2026 on Mount Rainier, Washington. *Arctic and Alpine Research* **12**, 359.
- 2027 MARSH, J., NOUVET, S., SANBORN, P. & COXSON, D. (2006). Composition and function of biological soil  
2028 crust communities along topographic gradients in grasslands of central interior British Columbia  
2029 (Chilcotin) and southwestern Yukon (Kluane). *Canadian Journal of Botany* **84**, 717–736.
- 2030 MARTIN, C., POHL, M., ALEWELL, C., KÖRNER, C. & RIXEN, C. (2010). Interrill erosion at disturbed alpine  
2031 sites: Effects of plant functional diversity and vegetation cover. *Basic and Applied Ecology* **11**, 619–  
2032 626.
- 2033 MATTHEWS, J.A. & VATER, A.E. (2015). Pioneer zone geo-ecological change: Observations from a  
2034 chronosequence on the Storbreen glacier foreland, Jotunheimen, southern Norway. *CATENA* **135**, 219–  
2035 230.
- 2036 MAYEL, S., JARRAH, M. & KUKA, K. (2021). How does grassland management affect physical and  
2037 biochemical properties of temperate grassland soils? A review study. *Grass Forage Science* **76**, 215–  
2038 244.
- 2039 MAZEL, F., MALARD, L., NICULITA-HIRZEL, H., YASHIRO, E., MOD, H.K., MITCHELL, E.A.D., SINGER, D.,  
2040 BURI, A., PINTO, E., GUEX, N., LARA, E. & GUISAN, A. (2022). Soil protist function varies with elevation  
2041 in the Swiss Alps. *Environmental Microbiology* **24**, 1689–1702.
- 2042 MA, X., ZHANG, Q., ZHENG, M., GAO, Y., YUAN, T., HALE, L., VAN NOSTRAND, J.D., ZHOU, J., WAN, S. &  
2043 YANG, Y. (2019). Microbial functional traits are sensitive indicators of mild disturbance by lamb grazing.  
2044 *The ISME Journal* **13**, 1370–1373.
- 2045 MCCAFFREY, J. & GALEN, C. (2011). Between a rock and a hard place: impact of nest selection behavior on  
2046 the altitudinal range of an alpine ant, *Formica neorufibarbis*. *Environmental Entomology* **40**, 534–540.
- 2047 MEJIA, A., CASTRO, V., PERALTA, D.F. & MONCADA, B. (2020). Altitudinal zonation of mosses in west of  
2048 the Sierra Nevada of Cocuy, Boyacá, Colombia. *Hoehnea* **47**.
- 2049 VAN DER MERWE, S.S., SWART, V.R., BREDENHAND, E. & HADDAD, C.R. (2020). Soil-dwelling arthropods  
2050 as indicators of erosion in a South African grassland habitat. *Pedobiologia* **80**, 150647.
- 2051 MESHCHERYAKOVA, E.N. & BERMAN, D.I. (2014). Cold hardiness and geographic distribution of  
2052 earthworms (Oligochaeta, Lumbricidae, Moniligastridae). *Entomological Review* **94**, 486–497.
- 2053 MESIBOV, R. (2018). A new, alpine species of *Lissodesmus* Chamberlin, 1920 from Tasmania, Australia  
2054 (Diplopoda, Polydesmida, Dalodesmidae). *Zookeys* 103–111.
- 2055 MEYER, E. & THALER, K. (1995). Animal diversity at high altitudes in the Austrian Central Alps. In *Arctic  
2056 and alpine biodiversity: patterns, causes and ecosystem consequences*, Ecological studies: analysis and  
2057 synthesis: 97–108. Chapin, F.S. & Körner, C. (Eds.). Berlin, Germany: Springer Berlin Heidelberg.

- 2058 MEYER, E. (1980). *Ökologische Untersuchungen an Wirbellosen des zentralalpiner Hochgebirges*  
2059 *(Obergurgl, Tirol): IV. Aktivitätsdichte, Abundanz und Biomasse der Makrofauna*. Universität  
2060 Innsbruck.
- 2061 MEYER, E. (1985). Distribution, activity, life-history and standing crop of Julidae (Diplopoda, Myriapoda)  
2062 in the Central High Alps (Tyrol, Austria). *Ecography* **8**, 141–150.
- 2063 MEYER, E. (1993). Beeinflussung der Fauna alpiner Böden durch Sommer- und Wintertourismus in West-  
2064 Österreich (Ötztaler Alpen, Rätikon). *Revue suisse de zoologie*. **100**, 519–527.
- 2065 MIEHE, G. (1988). Vegetation patterns on Mount Everest as influenced by monsoon and föhn. *Vegetatio* **79**,  
2066 21–32.
- 2067 MIKHAILYUK, T., GLASER, K., HOLZINGER, A. & KARSTEN, U. (2015). Biodiversity of *Klebsormidium*  
2068 (streptophyta) from alpine biological soil crusts (Alps, Tyrol, Austria, and Italy). *Journal of phycology*  
2069 **51**, 750–767.
- 2070 MILLER, N.G., FRYDAY, A.M. & HINDS, J.W. (2005). Bryophytes and lichens of a calcium-rich spring seep  
2071 isolated on the granitic terrain of Mt. Katahdin, Maine, U.S.A. *Rhodora* **107**, 339–358.
- 2072 MILLER, N.G. (2009). Lichens and bryophytes of the alpine and subalpine zones of Katahdin, Maine, III:  
2073 Bryophytes. *Bryologist* **112**, 704–748.
- 2074 MING, J., ZHAO, Y., WU, Q., HE, H. & GAO, L. (2022). Soil temperature dynamics and freezing processes  
2075 for biocrustal soils in frozen soil regions on the Qinghai–Tibet Plateau. *Geoderma* **409**, 115655.
- 2076 MINOR, M.A., BABENKO, A.B., ERMILOV, S.G., KHAUSTOV, A.A. & MAKAROVA, O.L. (2016). Effects of  
2077 Cushion Plants on High-Altitude Soil Microarthropod Communities: Cushions Increase Abundance and  
2078 Diversity of Mites (Acari), but not Springtails (Collembola). *Arctic, Antarctic, and Alpine Research* **48**,  
2079 485–500.
- 2080 MIREK, Z. & PIEKOS-MIRKOWA, H. (1992). Flora and Vegetation of the Polish Tatra Mountains. *Mountain*  
2081 *Research and Development* **12**, 147–173.
- 2082 MITCHELL, E.A.D., BRAGAZZA, L. & GERDOL, R. (2004). Testate amoebae (Protista) communities in  
2083 *Hylocomium splendens* (Hedw.) B.S.G. (Bryophyta): relationships with altitude, and moss elemental  
2084 chemistry. *Protist* **155**, 423–436.
- 2085 MOD, H.K., BURI, A., YASHIRO, E., GUEX, N., MALARD, L., PINTO-FIGUEROA, E., PAGNI, M., NICULITA-  
2086 HIRZEL, H., VAN DER MEER, J.R. & GUIGAN, A. (2021). Predicting spatial patterns of soil bacteria under  
2087 current and future environmental conditions. *The ISME Journal* **15**, 2547–2560.
- 2088 MOD, H.K., SCHERRER, D., DI COLA, V., BROENNIMANN, O., BLANDENIER, Q., BREINER, F.T., BURI, A.,  
2089 GOUDET, J., GUEX, N., LARA, E., MITCHELL, E.A.D., NICULITA-HIRZEL, H., PAGNI, M., PELLISSIER, L., *et*  
2090 *al.* (2020). Greater topoclimatic control of above- versus below-ground communities. *Global Change*  
2091 *Biology* **26**, 6715–6728.

- 2092 MUELLER, U.G. & GERARDO, N. (2002). Fungus-farming insects: multiple origins and diverse evolutionary  
2093 histories. *Proceedings of the National Academy of Sciences of the United States of America* **99**, 15247–  
2094 15249.
- 2095 MUGGIA, L., KLUG, B., BERG, G. & GRUBE, M. (2013). Localization of bacteria in lichens from Alpine soil  
2096 crusts by fluorescence in situ hybridization. *Applied Soil Ecology* **68**, 20–25.
- 2097 MÜHLMANN, O., BACHER, M. & PEINTNER, U. (2008). *Polygonum viviparum* mycobionts on an alpine  
2098 primary successional glacier forefront. *Mycorrhiza* **18**, 87–95.
- 2099 MÜHLMANN, O. & PEINTNER, U. (2008). Ectomycorrhiza of *Kobresia myosuroides* at a primary  
2100 successional glacier forefront. *Mycorrhiza* **18**, 355–362.
- 2101 MUSIELOK, Ł., DREWNIK, M., SZYMAŃSKI, W., STOLARCZYK, M., GUS-STOLARCZYK, M. & SKIBA, M.  
2102 (2021). Conditions favoring local podzolization in soils developed from flysch regolith – A case study  
2103 from the Bieszczady Mountains in southeastern Poland. *Geoderma* **381**, 114667.
- 2104 NARA, K. & HOGETSU, T. (2004). Ectomycorrhizal fungi on established shrubs facilitate subsequent  
2105 seedling establishment of successional plant species. *Ecology* **85**, 1700–1707.
- 2106 NASCIBENE, J., FONTANA, V. & SPITALE, D. (2014). A multi-taxon approach reveals the effect of  
2107 management intensity on biodiversity in Alpine larch grasslands. *Science of the Total Environment* **487**,  
2108 110–116.
- 2109 NEGRO, M., ISAIA, M., PALESTRINI, C., SCHOENHOFER, A. & ROLANDO, A. (2010). The impact of high-  
2110 altitude ski pistes on ground-dwelling arthropods in the Alps. *Biodiversity and Conservation* **19**, 1853–  
2111 1870.
- 2112 NEGRO, M., ROLANDO, A., BARNI, E., BOCOLA, D., FILIPPA, G., FREPPAZ, M., ISAIA, M., SINISCALCO, C. &  
2113 PALESTRINI, C. (2013). Differential responses of ground dwelling arthropods to ski-piste restoration by  
2114 hydroseeding. *Biodiversity and Conservation* **22**, 2607–2634.
- 2115 NEMERGUT, D.R., COSTELLO, E.K., MEYER, A.F., PESCADOR, M.Y., WEINTRAUB, M.N. & SCHMIDT, S.K.  
2116 (2005). Structure and function of alpine and arctic soil microbial communities. *Research in*  
2117 *Microbiology* **156**, 775–784.
- 2118 NIITYNEN, P. & LUOTO, M. (2018). The importance of snow in species distribution models of arctic  
2119 vegetation. *Ecography* **41**, 1024–1037.
- 2120 NILSSON, M.-C., WARDLE, D.A., ZACKRISSON, O. & JÄDERLUND, A. (2002). Effects of alleviation of  
2121 ecological stresses on an alpine tundra community over an eight-year period. *Oikos* **97**, 3–17.
- 2122 NYSTUEN, K.O., SUNDSDAL, K., OPEDAL, Ø.H., HOLIEN, H., STRIMBECK, G.R. & GRAAE, B.J. (2019).  
2123 Lichens facilitate seedling recruitment in alpine heath. *Journal of Vegetation Science* **30**, 868–880.
- 2124 O'MALLEY, M.A., SIMPSON, A.G.B. & ROGER, A.J. (2013). The other eukaryotes in light of evolutionary  
2125 protistology. *Biol. Philos.* **28**, 299–330.

- 2126 ODLAND, A. & MUNKEJORD, H.K. (2008). Plants as indicators of snow layer duration in southern Norwegian  
2127 mountains. *Ecological Indicators* **8**, 57–68.
- 2128 ODLAND, A., REINHARDT, S. & PEDERSEN, A. (2015). Differences in richness of vascular plants, mosses,  
2129 and liverworts in southern Norwegian alpine vegetation. *Plant Ecology & Diversity* **8**, 37–47.
- 2130 OLIVERIO, A.M., GEISEN, S., DELGADO-BAQUERIZO, M., MAESTRE, F.T., TURNER, B.L. & FIERER, N.  
2131 (2020). The global-scale distributions of soil protists and their contributions to belowground systems.  
2132 *Science Advances* **6**, eaax8787.
- 2133 ONIPCHENKO, V.G. & ZHAKOVA, O.E. (1997). The structure of large soil invertebrate communities  
2134 (Mesofauna) in the alpine ecosystems of the Teberda Reserve, the Northwestern Caucasus. *Oecologia*  
2135 *Montana* **6**, 35–38.
- 2136 ONUȚ-BRÄNNSTRÖM, I., TIBELL, L. & JOHANNESSON, H. (2017). A worldwide phylogeography of the  
2137 whiteworm lichens *Thamnomlia* reveals three lineages with distinct habitats and evolutionary histories.  
2138 *Ecology and Evolution* **7**, 3602–3615.
- 2139 ORGIAZZI, A., BARDGETT, R.D., BARRIOS, E., BEHAN-PELLETIER, V., BRIONES, M.J.I., CHOTTE, J.L., DE  
2140 DEYN, G.B., EGGLETON, P., FIERER, N., FRASER, T., HEDLUND, K., JEFFERY, S., JOHNSON, N.C., JONES,  
2141 A., KANDELER, E., KANEKO, N., *et al.* (2016). *Global Soil Biodiversity Atlas*. 1st edn. Publications Office  
2142 of the European Union.
- 2143 OZENDA, P. & BOREL, J.L. (2003). The Alpine Vegetation of the Alps. In *Alpine Biodiversity in Europe*,  
2144 Ecological Studies: 53–64. Nagy, L., Grabherr, G., Körner, C. & Thompson, D.B.A. (Eds.). Berlin,  
2145 Germany: Springer Springer-Verlag Berlin Heidelberg.
- 2146 OZENDA, P. (1988). *The vegetation of the Alps*. Conseil de l'Europe, European Committee for the  
2147 Conservation of Nature and Natural Resources.
- 2148 PALOMO, I. (2017). Climate change impacts on ecosystem services in high mountain areas: A literature  
2149 review. *Mountain Research and Development* **37**, 179–187.
- 2150 PANCHARD, T., BROENNIMANN, O., GRAVEY, M., MARIETHOZ, G. & GUISAN, A. (2023). Snow cover  
2151 persistence as a useful predictor of alpine plant distributions. *Journal of Biogeography* **50**, 1789–1802.
- 2152 PAN, X., XIE, Z., SUN, X., WU, D., SCHEU, S. & MARAUN, M. (2023). Changes in oribatid mite community  
2153 structure along two altitudinal gradients in Asia and Europe as related to environmental factors. *Applied*  
2154 *Soil Ecology* **189**, 104912.
- 2155 PARKS, D.H., CHUVOCHINA, M., WAITE, D.W., RINKE, C., SKARSHEWSKI, A., CHAUMEIL, P.-A. &  
2156 HUGENHOLTZ, P. (2018). A standardized bacterial taxonomy based on genome phylogeny substantially  
2157 revises the tree of life. *Nature Biotechnology* **36**, 996–1004.
- 2158 PAROLO, G. & ROSSI, G. (2008). Upward migration of vascular plants following a climate warming trend in  
2159 the Alps. *Basic and Applied Ecology* **9**, 100–107.

- 2160 PAUL, E.A. & CLARK, F.E. (1996). *Soil Microbiology and Biochemistry, Second Edition*. 2nd edn. San  
2161 Diego, CA: Academic Press.
- 2162 PAWLOWSKI, J., AUDIC, S., ADL, S., BASS, D., BELBAHRI, L., BERNEY, C., BOWSER, S.S., CEPICKA, I.,  
2163 DECELLE, J., DUNTHORN, M., FIORE-DONNO, A.M., GILE, G.H., HOLZMANN, M., JAHN, R., JIRKŮ, M., *et*  
2164 *al.* (2012). CBOL protist working group: barcoding eukaryotic richness beyond the animal, plant, and  
2165 fungal kingdoms. *PLoS Biology* **10**, e1001419.
- 2166 PEDROTTI, F. & GRAFTA, D. (2003). The High Mountain Flora and Vegetation of the Apennines and the  
2167 Italian Alps. In *Alpine Biodiversity in Europe*, Ecological Studies: 73–84. Nagy, L., Grabherr, G.,  
2168 Körner, C. & Thompson, D.B.A. (Eds.). Berlin, Germany: Springer Springer-Verlag Berlin Heidelberg.
- 2169 PEEL, M.C., FINLAYSON, B.L. & MCMAHON, T.A. (2007). Updated world map of the Köppen-Geiger  
2170 climate classification. *Hydrology and Earth System Sciences* **11**, 1633–1644.
- 2171 PEER, T., ZHENG, L.-J., NEUBAUER, F., FRIEDL, G., HAUZENBERGER, C. & KASPER-GIEBL, A. (2022).  
2172 Mineralogical Composition and Origin of Airborne Dust in an Alpine Environment of Hochtorn (Hohe  
2173 Tauern, Austria): Effects on Pedogenesis, Biological Soil Crusts, and Vascular Plant Growth. *Frontiers*  
2174 *in Earth Science* **10**.
- 2175 PEER, T. (2010). Species composition and pedological characteristics of biological soil crusts in a high  
2176 alpine ecosystem, Hohe Tauern, Austria. *eco.mont - Journal on Protected Mountain Areas Research*  
2177 *and Management* **2**, 23–30.
- 2178 PELLISSIER, L., NICULITA-HIRZEL, H., DUBUIS, A., PAGNI, M., GUEX, N., NDIRIBE, C., SALAMIN, N.,  
2179 XENARIOS, I., GOUDET, J., SANDERS, I.R. & GUIBAN, A. (2014). Soil fungal communities of grasslands  
2180 are environmentally structured at a regional scale in the Alps. *Molecular Ecology* **23**, 4274–4290.
- 2181 PEREZ-MON, C., FREY, B. & FROSSARD, A. (2020). Functional and Structural Responses of Arctic and  
2182 Alpine Soil Prokaryotic and Fungal Communities Under Freeze-Thaw Cycles of Different Frequencies.  
2183 *Frontiers in Microbiology* **11**, 982.
- 2184 PESSI, I.S., PUSHKAREVA, E., LARA, Y., BORDERIE, F., WILMOTTE, A. & ELSTER, J. (2019). Marked  
2185 succession of cyanobacterial communities following glacier retreat in the high arctic. *Microbiological*  
2186 *Ecology* **77**, 136–147.
- 2187 PETZ, W., FOISSNER, W., WIRNSBERGER, E., KRAUTGARTNER, W.D. & ADAM, H. (1986). Mycophagy, a new  
2188 feeding strategy in autochthonous soil ciliates. *Naturwissenschaften* **73**, 560–562.
- 2189 PINTO-FIGUEROA, E.A., SEDDON, E., YASHIRO, E., BURI, A., NICULITA-HIRZEL, H., VAN DER MEER, J.R. &  
2190 GUIBAN, A. (2019). Archaeorhizomycetes Spatial Distribution in Soils Along Wide Elevational and  
2191 Environmental Gradients Reveal Co-abundance Patterns With Other Fungal Saprotrophs and Potential  
2192 Weathering Capacities. *Frontiers in Microbiology* **10**, 656.



- 2193 PISSOLITO, C., GARIBOTTI, I. & VILLALBA, R. (2021). Inter-annual climatic variability modulates biotic  
2194 interactions on early *Nothofagus pumilio* community development. *Plant Ecology & Diversity* **14**, 65–  
2195 80.
- 2196 PIZZOLOTTO, R. (2016). Habitat diversity analysis along an altitudinal sequence of alpine habitats: the  
2197 Carabid beetle assemblages as a study model. *Periodicum Biologorum* **118**, 241–254.
- 2198 POHL, M., ALIG, D., KÖRNER, C. & RIXEN, C. (2009). Higher plant diversity enhances soil stability in  
2199 disturbed alpine ecosystems. *Plant and Soil* **324**, 91–102.
- 2200 PONTES, A., RUETHI, J., FREY, B., AIRES, A., THOMAS, A., OVERY, D., HALTI, B., KERR, R. & SAMPAIO, J.P.  
2201 (2020). *Cryolevonia* gen. nov. and *Cryolevonia schafbergensis* sp. nov., a cryophilic yeast from ancient  
2202 permafrost and melted sea ice. *International Journal of Systematic and Evolutionary Microbiology* **70**,  
2203 2334–2338.
- 2204 PORAZINSKA, D.L., BUENO DE MESQUITA, C.P., FARRER, E.C., SPASOJEVIC, M.J., SUDING, K.N. & SCHMIDT,  
2205 S.K. (2021). Nematode community diversity and function across an alpine landscape undergoing plant  
2206 colonization of previously unvegetated soils. *Soil Biology and Biochemistry* **161**, 108380.
- 2207 POTAPOV, A.M., BEAULIEU, F., BIRKHOFFER, K., BLUHM, S.L., DEGTYAREV, M.I., DEVETTER, M.,  
2208 GONCHAROV, A.A., GONGALSKY, K.B., KLARNER, B., KOROBUSHKIN, D.I., LIEBKE, D.F., MARAUN, M.,  
2209 MC DONNELL, R.J., POLLIERER, M.M., SCHAEFER, I., *et al.* (2022). Feeding habits and multifunctional  
2210 classification of soil-associated consumers from protists to vertebrates. *Biological Reviews* **97**, 1057–  
2211 1117.
- 2212 PRAEG, N., PAULI, H. & ILLMER, P. (2019). Microbial Diversity in Bulk and Rhizosphere Soil of *Ranunculus*  
2213 *glacialis* Along a High-Alpine Altitudinal Gradient. *Frontiers in Microbiology* **10**, 1429.
- 2214 PRAEG, N., SEEBER, J., LEITINGER, G., TASSER, E., NEWSELY, C., TAPPEINER, U. & ILLMER, P. (2020). The  
2215 role of land management and elevation in shaping soil microbial communities: Insights from the Central  
2216 European Alps. *Soil Biology and Biochemistry* **150**, 107951.
- 2217 PRICE, L. & HARDEN, C. (2013). Mountain soils. In *Mountain geography: physical and human dimensions*:  
2218 167–182. Berkeley, CA: University of California Press.
- 2219 PUNTSCHER, S. (1980). Ökologische Untersuchungen an Wirbellosen des zentralalpinen Hochgebirges  
2220 (Obergurgl, Tirol), V. Verteilung und Jahresrhythmik von Spinnen. *Veröffentlichungen der Universität*  
2221 *Innsbruck - Alpin-Biologische Studien* **14**, 1–106.
- 2222 VAN DER PUTTEN, W.H., BARDGETT, R.D., FARFAN, M., MONTANARELLA, L., SIX, J. & WALL, D.H. (2023).  
2223 Soil biodiversity needs policy without borders. *Science* **379**, 32–34.
- 2224 RAGGIO, J., ALLAN GREEN, T.G., SANCHO, L.G., PINTADO, A., COLESIE, C., WEBER, B. & BÜDEL, B. (2017).  
2225 Metabolic activity duration can be effectively predicted from macroclimatic data for biological soil crust  
2226 habitats across Europe. *Geoderma* **306**, 10–17.

- 2227 RAI, H., UPRETI, D.K. & GUPTA, R.K. (2012). Diversity and distribution of terricolous lichens as indicator  
2228 of habitat heterogeneity and grazing induced trampling in a temperate-alpine shrub and meadow.  
2229 *Biodiversity and Conservation* **21**, 97–113.
- 2230 RANDIN, C.F., ASHCROFT, M.B., BOLLIGER, J., CAVENDER-BARES, J., COOPS, N.C., DULLINGER, S.,  
2231 DIRNBÖCK, T., ECKERT, S., ELLIS, E., FERNÁNDEZ, N., GIULIANI, G., GUISAN, A., JETZ, W., JOOST, S.,  
2232 KARGER, D., *et al.* (2020). Monitoring biodiversity in the Anthropocene using remote sensing in species  
2233 distribution models. *Remote Sensing of Environment* **239**, 111626.
- 2234 RASO, L., SINT, D., MAYER, R., PLANGG, S., RECHEIS, T., BRUNNER, S., KAUFMANN, R. & TRAUGOTT, M.  
2235 (2014). Intraguild predation in pioneer predator communities of alpine glacier forelands. *Molecular*  
2236 *Ecology* **23**, 3744–3754.
- 2237 REHÁKOVÁ, K., CHLUMSKÁ, Z. & DOLEŽAL, J. (2011). Soil cyanobacterial and microalgal diversity in dry  
2238 mountains of Ladakh, NW Himalaya, as related to site, altitude, and vegetation. *Microbiological*  
2239 *Ecology* **62**, 337–346.
- 2240 REYMOND, A., PURCELL, J., CHERIX, D., GUISAN, A. & PELLISSIER, L. (2013). Functional diversity decreases  
2241 with temperature in high elevation ant fauna. *Ecological Entomology* **38**, 364–373.
- 2242 RICKETTS, M.P., PORETSKY, R.S., WELKER, J.M. & GONZALEZ-MELER, M.A. (2016). Soil bacterial  
2243 community and functional shifts in response to altered snowpack in moist acidic tundra of northern  
2244 Alaska. *SOIL* **2**, 459–474.
- 2245 RIEBESELL, J.F. (1982). Arctic-Alpine Plants on Mountaintops: Agreement with Island Biogeography  
2246 Theory. *The American Naturalist* **119**, 657–674.
- 2247 RIME, T., HARTMANN, M., BRUNNER, I., WIDMER, F., ZEYER, J. & FREY, B. (2015). Vertical distribution of  
2248 the soil microbiota along a successional gradient in a glacier forefield. *Molecular Ecology* **24**, 1091–  
2249 1108.
- 2250 RIME, T., HARTMANN, M. & FREY, B. (2016a). Potential sources of microbial colonizers in an initial soil  
2251 ecosystem after retreat of an alpine glacier. *The ISME Journal* **10**, 1625–1641.
- 2252 RIME, T., HARTMANN, M., STIERLI, B., ANESIO, A.M. & FREY, B. (2016b). Assimilation of microbial and  
2253 plant carbon by active prokaryotic and fungal populations in glacial forefields. *Soil Biology and*  
2254 *Biochemistry* **98**, 30–41.
- 2255 RISCH, A.C., SCHOTZ, M., VANDEGEHUCHTE, M.L., VAN DER PUTTEN, W.H., DUYTS, H., RASCHEIN, U.,  
2256 GWIAZDOWICZ, D.J., BUSSE, M.D., PAGE-DUMROESE, D.S. & ZIMMERMANN, S. (2015). Aboveground  
2257 vertebrate and invertebrate herbivore impact on net N mineralization in subalpine grasslands. *Ecology*  
2258 **96**, 3312–3322.
- 2259 RODWELL, J.S. (Ed.). (1992a). *British Plant Communities, Volume 2: Mires and Heaths*. Cambridge  
2260 University Press.

- 2261 RODWELL, J.S. (Ed.). (1992b). *British Plant Communities, Volume 3: Grasslands and Montane*  
2262 *Communities*. Cambridge, UK: Cambridge University Press.
- 2263 RONIQUIER, A. & RONIQUIER, M. (2009). How “alpine” are nivicolous myxomycetes? A worldwide assessment  
2264 of altitudinal distribution. *Mycologia* **101**, 1–16.
- 2265 RONIQUIER, A. (2008). Contribution to the biogeography of arctic-alpine fungi: first records in the Southern  
2266 Carpathians (Romania). *Sommerfeltia* **31**, 191–211.
- 2267 ROSLING, A., TIMLING, I. & TAYLOR, L. (2013). Archaeorhizomycetes: patterns of distribution and  
2268 abundance in soil. In *Genomics of Soil- and Plant-Associated Fungi (Soil Biology)*: 333–349.  
2269 Heidelberg, Germany: Springer Berlin/Heidelberg.
- 2270 ROTA, N., CANEDOLI, C., FERRÈ, C., FICETOLA, G.F., GUERRIERI, A. & PADOA-SCHIOPPA, E. (2020).  
2271 Evaluation of Soil Biodiversity in Alpine Habitats through eDNA Metabarcoding and Relationships with  
2272 Environmental Features. *Forests* **11**, 738.
- 2273 ROUSK, J., BROOKES, P.C. & BÅÅTH, E. (2009). Contrasting soil pH effects on fungal and bacterial growth  
2274 suggest functional redundancy in carbon mineralization. *Applied Environmental Microbiology* **75**,  
2275 1589–1596.
- 2276 ROUX-FOUILLET, P., WIPF, S. & RIXEN, C. (2011). Long-term impacts of ski piste management on alpine  
2277 vegetation and soils. *Journal of Applied Ecology* **48**, 906–915.
- 2278 RUI, J., LI, J., WANG, S., AN, J., LIU, W., LIN, Q., YANG, Y., HE, Z. & LI, X. (2015). Responses of Bacterial  
2279 Communities to Simulated Climate Changes in Alpine Meadow Soil of the Qinghai-Tibet Plateau.  
2280 *Applied Environmental Microbiology* **81**, 6070–6077.
- 2281 RUMPF, S.B., HÜLBER, K., KLONNER, G., MOSER, D., SCHÜTZ, M., WESSELY, J., WILLNER, W.,  
2282 ZIMMERMANN, N.E. & DULLINGER, S. (2018). Range dynamics of mountain plants decrease with  
2283 elevation. *Proceedings of the National Academy of Sciences of the United States of America* **115**, 1848–  
2284 1853.
- 2285 RUSEK, J. (1993). Air-Pollution-Mediated Changes in Alpine Ecosystems and Ecotones. *Ecological*  
2286 *Applications* **3**, 409–416.
- 2287 RÜTHI, J., BÖLSTERLI, D., PARDI-COMENSOLI, L., BRUNNER, I. & FREY, B. (2020). The “plastisphere” of  
2288 biodegradable plastics is characterized by specific microbial taxa of alpine and arctic soils. *Frontiers in*  
2289 *Environmental Science* **8**.
- 2290 RŮŽIČKA, V. & ZACHARDA, M. (1994). Arthropods of Stony Debris in the Krkonoše Mountains, Czech  
2291 Republic. *Arctic and Alpine Research* **26**, 332–338.
- 2292 RYBERG, M., ANDREASEN, M. & BJÖRK, R.G. (2011). Weak habitat specificity in ectomycorrhizal  
2293 communities associated with *Salix herbacea* and *Salix polaris* in alpine tundra. *Mycorrhiza* **21**, 289–296.
- 2294 RYDGREN, K., HALVORSEN, R., ODLAND, A. & SKJERDAL, G. (2011). Restoration of alpine spoil heaps:  
2295 Successional rates predict vegetation recovery in 50 years. *Ecological Engineering* **37**, 294–301.

- 2296 SALMON, J.T. (1940). The Collembolan Fauna of New Zealand, including a Discussion of Its Distribution  
2297 and Affinities. *Transactions and Proceedings of the Royal Society of New Zealand* **70**, 282–431.
- 2298 SANNINO, C., BORRUSO, L., MEZZASOMA, A., BATTISTEL, D., PONTI, S., TURCHETTI, B., BUZZINI, P. &  
2299 GUGLIELMIN, M. (2021). Abiotic factors affecting the bacterial and fungal diversity of permafrost in a  
2300 rock glacier in the Stelvio Pass (Italian Central Alps). *Applied Soil Ecology* **166**, 104079.
- 2301 SANNINO, C., BORRUSO, L., SMIRAGLIA, C., BANI, A., MEZZASOMA, A., BRUSETTI, L., TURCHETTI, B. &  
2302 BUZZINI, P. (2020). Dynamics of in situ growth and taxonomic structure of fungal communities in Alpine  
2303 supraglacial debris. *Fungal Ecology* **44**, 100891.
- 2304 SANTIBÁÑEZ, P., KOHSHIMA, S., SHEIHING, R., SILVA, R., JARAMILLO, J., LABARCA, P. & CASASSA, G.  
2305 (2011). First record of testate amoebae on glaciers and description of a new species *Puytoracia*  
2306 *jenswendti* nov. sp. (Rhizaria, Euglyphida). *Acta Protozoologica* **2011**, 1–14.
- 2307 SCHATZ, H. (2017). Oribatid mites (Acari: Oribatida) in the LTSER-research area in Mazia/Matsch  
2308 (SouthTyrol, Prov. Bolzano, Italy) – Investigations in the frame of the research week 2016. *Gredleriana*  
2309 **17**, 157–172.
- 2310 SCHELLENBERG, J. & BERGMEIER, E. (2020). Heathland plant species composition and vegetation structures  
2311 reflect soil-related paths of development and site history. *Applied Vegetation Science* **23**, 386–405.
- 2312 SCHIFANI, E., CASTRACANI, C., SPOTTI, F.A., GIANNETTI, D., GHIZZONI, M., GOBBI, M., LENCIONI, V.,  
2313 PEDROTTI, L., GRASSO, D.A. & MORI, A. (2021). Social Parasite Ants in the Alps: a New Site of the  
2314 Vulnerable *Myrmica myrmicoxena* and New Uppermost Altitudinal Limit for *M. microrubra*.  
2315 *Sociobiology* **68**, e7176.
- 2316 SCHMELLER, D.S., URBACH, D., BATES, K., CATALAN, J., COGĂLNICEANU, D., FISHER, M.C., FRIESEN, J.,  
2317 FÜREDER, L., GAUBE, V., HAVER, M., JACOBSEN, D., LE ROUX, G., LIN, Y.-P., LOYAU, A., MACHATE, O.,  
2318 *et al.* (2022). Scientists’ warning of threats to mountains. *Science of the Total Environment* **853**, 158611.
- 2319 SCHMIDT, S.K., REED, S.C., NEMERGUT, D.R., GRANDY, A.S., CLEVELAND, C.C., WEINTRAUB, M.N., HILL,  
2320 A.W., COSTELLO, E.K., MEYER, A.F., NEFF, J.C. & MARTIN, A.M. (2008). The earliest stages of  
2321 ecosystem succession in high-elevation (5000 metres above sea level), recently deglaciated soils.  
2322 *Proceedings of the Royal Society B: Biological Sciences* **275**, 2793–2802.
- 2323 SCHMIDT, S.K. & VIMERCATI, L. (2019). Growth of cyanobacterial soil crusts during diurnal freeze-thaw  
2324 cycles. *Journal of Microbiology* **57**, 243–251.
- 2325 SCHOVILLE, S.D., SLATYER, R.A., BERGDAHL, J.C. & VALDEZ, G.A. (2015). Conserved and narrow  
2326 temperature limits in alpine insects: Thermal tolerance and supercooling points of the ice-crawlers,  
2327 *Grylloblatta* (Insecta: Grylloblattodea: Grylloblattidae). *Journal of Insect Physiology* **78**, 55–61.
- 2328 SEEGER, J., NEWSELY, C., STEINWANDTER, M., RIEF, A., KÖRNER, C., TAPPEINER, U. & MEYER, E. (2021).  
2329 Soil invertebrate abundance, diversity, and community composition across steep high elevation  
2330 snowmelt gradients in the European Alps. *Arctic, Antarctic, and Alpine Research* **53**, 288–299.

- 2331 SEEGER, J., SEEGER, G.U.H., KÖSSLER, W., LANGEL, R., SCHEU, S. & MEYER, E. (2005). Abundance and  
2332 trophic structure of macro-decomposers on alpine pastureland (Central Alps, Tyrol): effects of  
2333 abandonment of pasturing. *Pedobiologia* **49**, 221–228.
- 2334 SENN-IRLET, B. (1988). Macromycetes in alpine snow-bed communitiesmycocoenological investigations.  
2335 *Acta botanica neerlandica* **37**, 251–263.
- 2336 SENN-IRLET, B. (1993). The mycoflora of Alpine mire communities rich in Salix. In *Arctic and Alpine*  
2337 *Mycology*, 3-4. Berlin, Germany: Cramer.
- 2338 SEPPEY, C.V.W., BROENNIMANN, O., BURI, A., YASHIRO, E., PINTO-FIGUEROA, E., SINGER, D.,  
2339 BLANDENIER, Q., MITCHELL, E.A.D., NICULITA-HIRZEL, H., GUIGAN, A. & LARA, E. (2020). Soil protist  
2340 diversity in the Swiss western Alps is better predicted by topo-climatic than by edaphic variables.  
2341 *Journal of Biogeography* **47**, 866–878.
- 2342 SEPPEY, C.V.W., SINGER, D., DUMACK, K., FOURNIER, B., BELBAHRI, L., MITCHELL, E.A.D. & LARA, E.  
2343 (2017). Distribution patterns of soil microbial eukaryotes suggests widespread algivory by phagotrophic  
2344 protists as an alternative pathway for nutrient cycling. *Soil Biology and Biochemistry* **112**, 68–76.
- 2345 SHEN, C., LIANG, W., SHI, Y., LIN, X., ZHANG, H., WU, X., XIE, G., CHAIN, P., GROGAN, P. & CHU, H. (2014).  
2346 Contrasting elevational diversity patterns between eukaryotic soil microbes and plants. *Ecology* **95**,  
2347 3190–3202.
- 2348 SHEN, C., NI, Y., LIANG, W., WANG, J. & CHU, H. (2015). Distinct soil bacterial communities along a small-  
2349 scale elevational gradient in alpine tundra. *Frontiers in Microbiology* **6**, 582.
- 2350 SINGER, D., DUCKERT, C., HEDĚNEC, P., LARA, E., HILTBRUNNER, E. & MITCHELL, E.A.D. (2020). High-  
2351 throughput sequencing of litter and moss eDNA reveals a positive correlation between the diversity of  
2352 Apicomplexa and their invertebrate hosts across alpine habitats. *Soil Biology and Biochemistry* **147**,  
2353 107837.
- 2354 SINGER, D., SEPPEY, C.V.W., LENTENDU, G., DUNTHORN, M., BASS, D., BELBAHRI, L., BLANDENIER, Q.,  
2355 DEBROAS, D., DE GROOT, G.A., DE VARGAS, C., DOMAIZON, I., DUCKERT, C., IZAGUIRRE, I., KOENIG, I.,  
2356 MATALONI, G., *et al.* (2021). Protist taxonomic and functional diversity in soil, freshwater and marine  
2357 ecosystems. *Environment International* **146**, 106262.
- 2358 SINGH, D., TAKAHASHI, K. & ADAMS, J.M. (2012). Elevational patterns in archaeal diversity on Mt. Fuji.  
2359 *PLoS ONE* **7**, e44494.
- 2360 SINGH, R., GUPTA, I., RAINA, R., MAHAJAN, P., SRIVASTAVA, P., SINGH, V.K. & BATISH, D.R. (2023).  
2361 Mountain soils and climate change: importance, threats and mitigation measures. In *Understanding soils*  
2362 *of mountainous landscapes*: 3–21. Amsterdam, Netherlands: Elsevier.
- 2363 SINT, D., KAUFMANN, R., MAYER, R. & TRAUGOTT, M. (2019). Resolving the predator first paradox:  
2364 Arthropod predator food webs in pioneer sites of glacier forelands. *Molecular Ecology* **28**, 336–347.

- 2365 SNETHLAGE, M.A., GESCHKE, J., RANIPETA, A., JETZ, W., YOCCOZ, N.G., KÖRNER, C., SPEHN, E.M.,  
2366 FISCHER, M. & URBACH, D. (2022). A hierarchical inventory of the world's mountains for global  
2367 comparative mountain science. *Scientific Data* **9**, 149.
- 2368 SNYDER, B.A., CALLAHAM, M.A. & HENDRIX, P.F. (2011). Spatial variability of an invasive earthworm  
2369 (*Amyntas agrestis*) population and potential impacts on soil characteristics and millipedes in the Great  
2370 Smoky Mountains National Park, USA. *Biological Invasions* **13**, 349–358.
- 2371 SOIL SURVEY STAFF (2022). *Keys to Soil Taxonomy*. 13th edn. Washington, D.C., United States: USDA  
2372 Natural Resources Conservation Service.
- 2373 SØMME, L. & BLOCK, W. (1991). Adaptations to alpine and polar environments in insects and other  
2374 terrestrial arthropods. In *Insects at low temperature*: 318–359. Lee, R.E. & Denlinger, D.L. (Eds.).  
2375 Boston, MA: Springer US.
- 2376 SØRENSEN, L.I., MIKOLA, J., KYTÖVIITA, M.-M. & OLOFSSON, J. (2009). Trampling and Spatial  
2377 Heterogeneity Explain Decomposer Abundances in a Sub-Arctic Grassland Subjected to Simulated  
2378 Reindeer Grazing. *Ecosystems* **12**, 830–842.
- 2379 SPOTTI, F.A., CASTRACANI, C., GRASSO, D.A. & MORI, A. (2015). Daily activity patterns and food  
2380 preferences in an alpine ant community. *Ethology Ecology & Evolution* **27**, 306–324.
- 2381 ST. CLAIR, L.L., JOHANSEN, J.R., ST. CLAIR, S.B. & KNIGHT, K.B. (2007). The Influence of Grazing and  
2382 Other Environmental Factors on Lichen Community Structure along an Alpine Tundra Ridge in the  
2383 Uinta Mountains, Utah, U.S.A. *Arctic, Antarctic, and Alpine Research* **39**, 603–613.
- 2384 STAJICH, J.E., BERBEE, M.L., BLACKWELL, M., HIBBETT, D.S., JAMES, T.Y., SPATAFORA, J.W. & TAYLOR,  
2385 J.W. (2009). The fungi. *Current Biology* **19**, R840-5.
- 2386 STANCHI, S., ANARBAEV, M., HANNMAN, I., ILLMER, P., PRAEG, N., SEEBER, J., STEINWANDTER, M., WEBER,  
2387 B. & FREPPAZ, M. (2023). *Sustainable Soil Management in Mountain Regions - Policy Brief*. Rome,  
2388 Italy: FAO Mountain Partnership.
- 2389 STANCHI, S., D'AMICO, M.E., PINTALDI, E., COLOMBO, N., ROMEO, R. & FREPPAZ, M. (2021). Mountain  
2390 Soils. In *Recarbonizing global soils – A technical manual of recommended management practices*: 107–  
2391 128. Rome, Italy: FAO.
- 2392 STAUDE, I.R., PEREIRA, H.M., DASKALOVA, G.N., BERNHARDT-RÖMERMANN, M., DIEKMANN, M., PAULI,  
2393 H., VAN CALSTER, H., VELLEND, M., BJORKMAN, A.D., BRUNET, J., DE FRENNE, P., HÉDL, R., JANDT, U.,  
2394 LENOIR, J., MYERS-SMITH, I.H., *et al.* (2022). Directional turnover towards larger-ranged plants over  
2395 time and across habitats. *Ecology Letters* **25**, 466–482.
- 2396 STEINBAUER, M.J., GRYTNES, J.-A., JURASINSKI, G., KULONEN, A., LENOIR, J., PAULI, H., RIXEN, C.,  
2397 WINKLER, M., BARDY-DURCHHALTER, M., BARNI, E., BJORKMAN, A.D., BREINER, F.T., BURG, S.,  
2398 CZORTEK, P., DAWES, M.A., *et al.* (2018). Accelerated increase in plant species richness on mountain  
2399 summits is linked to warming. *Nature* **556**, 231–234.

- 2400 STEINWANDTER, M., BLASBICHLER, H. & SEEBER, J. (2022). Vegetation shapes alpine ground-dwelling  
2401 macro-invertebrate communities: A case study from the Stifserjoch/Stelvio National Park  
2402 (Martell/Martello, South Tyrol, Italy). *Gredleriana* **22**, 128–140.
- 2403 STEINWANDTER, M., KAHLEN, M., TAPPEINER, U. & SEEBER, J. (2019). First records of *Opetiopalpus*  
2404 *sabulosus* Motschulsky, 1840 (Coleoptera, Cleridae) for the European Alps. *Nature Conservation* **34**,  
2405 119–125.
- 2406 STEINWANDTER, M., RIEF, A., SCHEU, S., TRAUGOTT, M. & SEEBER, J. (2018). Structural and functional  
2407 characteristics of high alpine soil macro-invertebrate communities. *European Journal of Soil Biology*  
2408 **86**, 72–80.
- 2409 STEINWANDTER, M. & SEEBER, J. (2022). Belowground mountaineers: critters living in mountain soils.  
2410 *Frontiers for Young Minds*. **10**.
- 2411 STEINWANDTER, M. & SEEBER, J. (2023). Ground-dwelling invertebrates of the high alpine: Changes in  
2412 diversity and community composition along elevation (1500–3000 m). *Applied Soil Ecology* **190**,  
2413 104988.
- 2414 STRIGANOVA, B.R. & RYBALOV, L.B. (2008). Altitude-related changes in the mesofauna structure in soils  
2415 of the Ethiopian plateau. *Eurasian Soil Science* **41**, 759–767.
- 2416 SUBEDI, I.P. & BUDHA, P.B. (2020). Diversity and distribution patterns of ants along elevational gradients.  
2417 *Nepalese Journal of Zoology* **4**, 44–49.
- 2418 SUN, S.-Q., WU, Y.-H., WANG, G.-X., ZHOU, J., YU, D., BING, H.-J. & LUO, J. (2013). Bryophyte species  
2419 richness and composition along an altitudinal gradient in Gongga Mountain, China. *PLoS ONE* **8**,  
2420 e58131.
- 2421 SUNDSTØL, S.A. & ODLAND, A. (2017). Responses of alpine vascular plants and lichens to soil temperatures.  
2422 *Annales botanici Fennici* **54**, 17–28.
- 2423 SYLVAIN, Z.A., WALL, D.H., CHERWIN, K.L., PETERS, D.P.C., REICHMANN, L.G. & SALA, O.E. (2014). Soil  
2424 animal responses to moisture availability are largely scale, not ecosystem dependent: insight from a  
2425 cross-site study. *Global Change Biology* **20**, 2631–2643.
- 2426 TAMM, A., CAESAR, J., KUNZ, N., COLESIE, C., REICHENBERGER, H. & WEBER, B. (2018). Ecophysiological  
2427 properties of three biological soil crust types and their photoautotrophs from the Succulent Karoo, South  
2428 Africa. *Plant and Soil* **429**, 1–20.
- 2429 TAYLOR, A.F.S., FREITAG, T.E., ROBINSON, L., WHITE, D., HEDLEY, P. & BRITTON, A.J. (2022). Nitrogen  
2430 deposition and temperature structure fungal communities associated with alpine moss-sedge heath in the  
2431 UK. *Fungal Ecology* **60**, 101191.
- 2432 TAYLOR, D.L., HOLLINGSWORTH, T.N., MCFARLAND, J.W., LENNON, N.J., NUSBAUM, C. & RUESS, R.W.  
2433 (2014). A first comprehensive census of fungi in soil reveals both hyperdiversity and fine-scale niche  
2434 partitioning. *Ecology Monographs* **84**, 3–20.

- 2435 TEDERSON, L., BAHRAM, M., PÖLME, S., KÕLJALG, U., YOROU, N.S., WIJESUNDERA, R., VILLARREAL RUIZ,  
2436 L., VASCO-PALACIOS, A.M., THU, P.Q., SUJJA, A., SMITH, M.E., SHARP, C., SALUVEER, E., SAIITA, A.,  
2437 ROSAS, M., *et al.* (2014). Fungal biogeography. Global diversity and geography of soil fungi. *Science*  
2438 **346**, 1256688.
- 2439 THOEN, E., AAS, A.B., VIK, U., BRYSTING, A.K., SKREDE, I., CARLSEN, T. & KAUSERUD, H. (2019). A single  
2440 ectomycorrhizal plant root system includes a diverse and spatially structured fungal community.  
2441 *Mycorrhiza* **29**, 167–180.
- 2442 THOMPSON, D.B.A. & BROWN, A. (1992). Biodiversity in montane Britain: habitat variation, vegetation  
2443 diversity and some objectives for conservation. *Biodiversity and Conservation* **1**, 179–208.
- 2444 TOLLEFSON, J. (2023). Melting glaciers will reveal vast new ecosystems in need of protection. *Nature*.
- 2445 TONJER, L.-R., THOEN, E., MORGADO, L., BOTNEN, S., MUNDRA, S., NYBAKKEN, L., BRYN, A. & KAUSERUD,  
2446 H. (2021). Fungal community dynamics across a forest-alpine ecotone. *Molecular Ecology* **30**, 4926–  
2447 4938.
- 2448 TSYGANOV, A.N., BOBROV, A.A., SHIMANO, S.D., MITCHELL, E.A.D., HAGIWARA, Y., WALL, A.A.J.,  
2449 MAZEI, N.G., CHERNYSHOV, V.A., WANNER, M., ZHONG, Y., SOGAME, Y. & MAZEI, Y.A. (2022).  
2450 Distribution of soil testate amoeba assemblages along an elevation gradient on Mount Fuji (Japan).  
2451 *European Journal of Protistology* **84**, 125894.
- 2452 TÜRK, R. & GÄRTNER, G. (2003). Biological soil crusts of the subalpine, alpine, and nival areas in the alps.  
2453 In *Biological soil crusts: structure, function, and management*, Ecological Studies: 67–73. Belnap, J. &  
2454 Lange, O.L. (Eds.). Berlin, Germany: Springer Berlin Heidelberg.
- 2455 UNITED NATIONS (2015). *Global Sustainable Development Report 2015*. UNDESA.
- 2456 UN CONVENTION ON BIOLOGICAL DIVERSITY (2022). *Kunming-Montreal Global Biodiversity Framework*.  
2457 UN Environment Programme, Montreal, Canada.
- 2458 VALENCIA, E., GROSS, N., QUERO, J.L., CARMONA, C.P., OCHOA, V., GOZALO, B., DELGADO-BAQUERIZO,  
2459 M., DUMACK, K., HAMONTS, K., SINGH, B.K., BONKOWSKI, M. & MAESTRE, F.T. (2018). Cascading  
2460 effects from plants to soil microorganisms explain how plant species richness and simulated climate  
2461 change affect soil multifunctionality. *Global Change Biology* **24**, 5642–5654.
- 2462 VALLE, B., AMBROSINI, R., CACCIANIGA, M. & GOBBI, M. (2020). Ecology of the cold-adapted species  
2463 *Nebria germari* (Coleoptera: Carabidae): the role of supraglacial stony debris as refugium during the  
2464 current interglacial period. *Acta Zoologica Academiae Scientiarum Hungaricae* **66**, 199–220.
- 2465 VANNESTE, T., MICHELSEN, O., GRAAE, B.J., KYRKJEEIDE, M.O., HOLIEN, H., HASSEL, K., LINDMO, S.,  
2466 KAPÁS, R.E. & DE FRENNE, P. (2017). Impact of climate change on alpine vegetation of mountain  
2467 summits in Norway. *Ecological Research* **32**, 579–593.



- 2468 VERDON, V., MALARD, L., COLLART, F., ADDE, A., GUEX, N., MOD, H., YASHIRO, E., LARA, E., SINGER, D.,  
2469 NICULITA-HIRZEL, H. & GUIBAN, A. (2023). Can we accurately predict the distribution of soil  
2470 microorganism presence and relative abundance? *Authorea*, September 04, 2023.
- 2471 VIRTANEN, R., DIRNBÖCK, T., DULLINGER, S., GRABHERR, G., PAULI, H., STAUDINGER, M. & VILLAR, L.  
2472 (2003). Patterns in the Plant Species Richness of European High Mountain Vegetation. In *Alpine*  
2473 *Biodiversity in Europe*, Ecological Studies: 149–172. Nagy, L., Grabherr, G., Körner, C. & Thompson,  
2474 D.B.A. (Eds.). Berlin, Germany: Springer Berlin Heidelberg.
- 2475 VISIOLI, G., SANANGELANTONI, A.M., CONTI, F.D., BONATI, B., GARDI, C. & MENTA, C. (2019). Above and  
2476 belowground biodiversity in adjacent and distinct serpentine soils. *Applied Soil Ecology* **133**, 98–103.
- 2477 VITTOZ, P., CAMENISCH, M., MAYOR, R., MISERERE, L., VUST, M. & THEURILLAT, J.-P. (2010). Subalpine-  
2478 nival gradient of species richness for vascular plants, bryophytes and lichens in the Swiss Inner Alps.  
2479 *Botanica Helvetica* **120**, 139–149.
- 2480 WAGG, C., BENDER, S.F., WIDMER, F. & VAN DER HEIJDEN, M.G.A. (2014). Soil biodiversity and soil  
2481 community composition determine ecosystem multifunctionality. *Proceedings of the National Academy*  
2482 *of Sciences of the United States of America* **111**, 5266–5270.
- 2483 WAGNER, R., ZONA, D., OECHEL, W. & LIPSON, D. (2017). Microbial community structure and soil pH  
2484 correspond to methane production in Arctic Alaska soils. *Environmental Microbiology* **19**, 3398–3410.
- 2485 WAHREN, C.H.A., WILLIAMS, R.J. & PAPST, W.A. (2001). Vegetation change and ecological processes in  
2486 alpine and subalpine *sphagnum* bogs of the bogong high plains, victoria, australia. *Arctic, Antarctic, and*  
2487 *Alpine Research* **33**, 357–368.
- 2488 WALKER, T.W.N., GAVAZOV, K., GUILLAUME, T., LAMBERT, T., MARIOTTE, P., ROUTH, D., SIGNARBIEUX,  
2489 C., BLOCK, S., MÜNKEMÜLLER, T., NOMOTO, H., CROWTHER, T.W., RICHTER, A., BUTTLER, A. &  
2490 ALEXANDER, J.M. (2022). Lowland plant arrival in alpine ecosystems facilitates a decrease in soil carbon  
2491 content under experimental climate warming. *eLife* **11**.
- 2492 WANG, C., WANG, G., WU, P., RAFIQUE, R., ZI, H., LI, X. & LUO, Y. (2017). Effects of Ant Mounds on the  
2493 Plant and Soil Microbial Community in an Alpine Meadow of Qinghai-Tibet Plateau. *Land Degradation*  
2494 *& Development* **28**, 1538–1548.
- 2495 WANG, J., WU, Y., LI, J., HE, Q., ZHU, H. & BING, H. (2021). Energetic supply regulates heterotrophic  
2496 nitrogen fixation along a glacial chronosequence. *Soil Biology and Biochemistry* **154**, 108150.
- 2497 WANG, J.-T., CAO, P., HU, H.-W., LI, J., HAN, L.-L., ZHANG, L.-M., ZHENG, Y.-M. & HE, J.-Z. (2015).  
2498 Altitudinal distribution patterns of soil bacterial and archaeal communities along mt. Shegyla on the  
2499 Tibetan Plateau. *Microbiological Ecology* **69**, 135–145.
- 2500 WANG, X., NIELSEN, U.N., YANG, X., ZHANG, L., ZHOU, X., DU, G., LI, G., CHEN, S. & XIAO, S. (2018).  
2501 Grazing induces direct and indirect shrub effects on soil nematode communities. *Soil Biology and*  
2502 *Biochemistry* **121**, 193–201.

- 2503 WEBER, B., BELNAP, J., BÜDEL, B., ANTONINKA, A.J., BARGER, N.N., CHAUDHARY, V.B., DARROUZET-  
2504 NARDI, A., ELDRIDGE, D.J., FAIST, A.M., FERRENBURG, S., HAVRILLA, C.A., HUBER-SANNWALD, E.,  
2505 MALAM ISSA, O., MAESTRE, F.T., *et al.* (2022). What is a biocrust? A refined, contemporary definition  
2506 for a broadening research community. *Biological Reviews of the Cambridge Philosophical Society* **97**,  
2507 1768–1785.
- 2508 WEBER, B., BÜDEL, B. & BELNAP, J. (Eds.). (2016). *Biological soil crusts: an organizing principle in*  
2509 *drylands*. Ecological Studies. Cham, Switzerland: Springer International Publishing.
- 2510 WEI, X., QIN, F., HAN, B., ZHOU, H., LIU, M. & SHAO, X. (2022). Spatial variations of bacterial communities  
2511 associated with biological soil crusts along a climatic gradient in alpine grassland ecosystems. *Plant and*  
2512 *Soil* **480**, 493–506.
- 2513 WEN, A., WU, T., ZHU, X., LI, R., WU, X., CHEN, J., QIAO, Y., NI, J., MA, W., LI, X. & SHANG, C. (2022).  
2514 Changes in the spatial distribution of Bryophytes on the Qinghai–Tibet Plateau under CMIP6 future  
2515 projections. *Environmental Earth Sciences* **81**, 15.
- 2516 WHEELER, J.A., HERMANUTZ, L. & MARINO, P.M. (2011). Feathermoss seedbeds facilitate black spruce  
2517 seedling recruitment in the forest-tundra ecotone (Labrador, Canada). *Oikos* **120**, 1263–1271.
- 2518 WIESER, G., HOLTMEIER, F.-K. & SMITH, W.K. (2014). Treelines in a changing global environment. In *Trees*  
2519 *in a changing environment*, Plant Ecophysiology: 221–263. Tausz, M. & Grulke, N. (Eds.). Dordrecht,  
2520 Netherlands: Springer Netherlands.
- 2521 WINKLER, M., ILLMER, P., QUERNER, P., FISCHER, B.M., HOFMANN, K., LAMPRECHT, A., PRAEG, N., SCHIED,  
2522 J., STEINBAUER, K. & PAULI, H. (2018). Side by side? Vascular plant, invertebrate, and microorganism  
2523 distribution patterns along an alpine to nival elevation gradient. *Arctic, Antarctic, and Alpine Research*  
2524 **50**, e1475951.
- 2525 WIPF, S., RIXEN, C., FISCHER, M., SCHMID, B. & STOECKLI, V. (2005). Effects of ski piste preparation on  
2526 alpine vegetation. *Journal of Applied Ecology* **42**, 306–316.
- 2527 WOJCIK, R., DONHAUSER, J., FREY, B. & BENNING, L.G. (2020). Time since deglaciation and  
2528 geomorphological disturbances determine the patterns of geochemical, mineralogical and microbial  
2529 successions in an Icelandic foreland. *Geoderma* **379**, 114578.
- 2530 WOODWARD, A. (2021). *Rock gnome lichen (Gymnoderma lineare) monitoring assessment, southern*  
2531 *Appalachian Mountains, 1983–2008* (USGS Numbered Series No. 2021–1011). Open-File Report. U.S.  
2532 Geological Survey, Reston, VA.
- 2533 WU, P., ZHANG, H., CUI, L., WICKINGS, K., FU, S. & WANG, C. (2017). Impacts of alpine wetland  
2534 degradation on the composition, diversity and trophic structure of soil nematodes on the Qinghai-Tibetan  
2535 Plateau. *Scientific Reports* **7**, 837.
- 2536 WU, P., ZHANG, H. & WANG, Y. (2015). The response of soil macroinvertebrates to alpine meadow  
2537 degradation in the Qinghai–Tibetan Plateau, China. *Applied Soil Ecology* **90**, 60–67.

- 2538 XIAO, X., ZHANG, F., LI, X., WANG, G., ZENG, C. & SHI, X. (2020). Hydrological functioning of thawing  
2539 soil water in a permafrost-influenced alpine meadow hillslope. *Vadose Zone Journal* **19**, e20022.
- 2540 XIE, Z., SUN, X., LUX, J., CHEN, T.-W., POTAPOV, M., WU, D. & SCHEU, S. (2022). Drivers of Collembola  
2541 assemblages along an altitudinal gradient in northeast China. *Ecology and Evolution* **12**, e8559.
- 2542 XU, H., ZHANG, Y., KANG, B., QIN, F., LIU, X., ZHOU, H. & SHAO, X. (2020). Different types of biocrusts  
2543 affect plant communities by changing the microenvironment and surface soil nutrients in the Qinghai-  
2544 Tibetan Plateau. *Arid Land Research and Management* **34**, 306–318.
- 2545 YANG, R., CAI, X., LI, X., CHRISTIE, P., ZHANG, J. & GAI, J. (2017). Temperature-mediated local adaptation  
2546 alters the symbiotic function in arbuscular mycorrhiza. *Environmental Microbiology* **19**, 2616–2628.
- 2547 YANG, Y., GAO, Y., WANG, S., XU, D., YU, H., WU, L., LIN, Q., HU, Y., LI, X., HE, Z., DENG, Y. & ZHOU, J.  
2548 (2014). The microbial gene diversity along an elevation gradient of the Tibetan grassland. *The ISME*  
2549 *Journal* **8**, 430–440.
- 2550 YANG, Z., ZHU, Q., ZHAN, W., XU, Y., ZHU, E., GAO, Y., LI, S., ZHENG, Q., ZHU, D., HE, Y., PENG, C. &  
2551 CHEN, H. (2018). The linkage between vegetation and soil nutrients and their variation under different  
2552 grazing intensities in an alpine meadow on the eastern Qinghai-Tibetan Plateau. *Ecological Engineering*  
2553 **110**, 128–136.
- 2554 YAO, F., VIK, U., BRYSTING, A.K., CARLSEN, T., HALVORSEN, R. & KAUSERUD, H. (2013). Substantial  
2555 compositional turnover of fungal communities in an alpine ridge-to-snowbed gradient. *Molecular*  
2556 *Ecology* **22**, 5040–5052.
- 2557 YASHIRO, E., PINTO-FIGUEROA, E., BURI, A., SPANGENBERG, J.E., ADATTE, T., NICULITA-HIRZEL, H.,  
2558 GUIGAN, A. & VAN DER MEER, J.R. (2016). Local environmental factors drive divergent grassland soil  
2559 bacterial communities in the western Swiss Alps. *Applied Environmental Microbiology* **82**, 6303–6316.
- 2560 YEATES, G.W. & FOISSNER, W. (1995). Testate amoebae as predators of nematodes. *Biology and Fertility*  
2561 *of Soils* **20**, 1–7.
- 2562 YU, X.-D., LÜ, L., LUO, T.-H. & ZHOU, H.-Z. (2013). Elevational gradient in species richness pattern of  
2563 epigeaic beetles and underlying mechanisms at east slope of Balang Mountain in southwestern China.  
2564 *PLoS ONE* **8**, e69177.
- 2565 YUAN, Y., SI, G., LI, W. & ZHANG, G. (2015). Altitudinal Distribution of Ammonia-Oxidizing Archaea and  
2566 Bacteria in Alpine Grassland Soils Along the South-Facing Slope of Nyqentangula Mountains, Central  
2567 Tibetan Plateau. *Geomicrobiology J.* **32**, 77–88.
- 2568 YUAN, Y., SI, G., WANG, J., LUO, T. & ZHANG, G. (2014). Bacterial community in alpine grasslands along  
2569 an altitudinal gradient on the Tibetan Plateau. *FEMS Microbiology Ecology* **87**, 121–132.
- 2570 ZEIDLER, M., ŠIPOŠ, J., BANAŠ, M. & ČERNOHORSKÝ, J. (2022). Homogenization of bryophyte species after  
2571 alpine grassland restoration. *Journal of Environmental Management* **319**, 115628.

- 2572 ZEISS, R., EISENHAUER, N., ORGIAZZI, A., RILLIG, M., BUSCOT, F., JONES, A., LEHMANN, A., REITZ, T.,  
2573 SMITH, L. & GUERRA, C.A. (2022). Challenges of and opportunities for protecting European soil  
2574 biodiversity. *Conservation Biology* **36**, e13930.
- 2575 ZHANG, H. & FU, G. (2021). Responses of plant, soil bacterial and fungal communities to grazing vary with  
2576 pasture seasons and grassland types, northern Tibet. *Land Degradation & Development* **32**, 1821–1832.
- 2577 ZHANG, H., LI, S., ZHANG, G. & FU, G. (2020). Response of soil microbial communities to warming and  
2578 clipping in alpine meadows in Northern Tibet. *Sustainability* **12**, 5617.
- 2579 ZHANG, T., CHEN, H.Y.H. & RUAN, H. (2018). Global negative effects of nitrogen deposition on soil  
2580 microbes. *The ISME Journal* **12**, 1817–1825.
- 2581 ZHAO, M., YU, Y., SHI, Y., MOU, X. & DEGEN, A. (2020). Mound-building ants increase the proportion of  
2582 Gramineae in above-ground vegetation and the soil seed bank in alpine meadows. *Journal of Vegetation  
2583 Science* **31**, 867–876.
- 2584 ZHENG, L.-J., MAIER, S., GRUBE, M., TÜRK, R., GRUBER, J.P. & PEER, T. (2014). Alpine biological soil crusts  
2585 on the Hohtor (Grossglockner high alpine route, Hohe Tauern, Austria): soils, function and biodiversity.  
2586 *Acta ZooBot Austria* **150/151**, 175–196.
- 2587 ZINGER, L., LEJON, D.P.H., BAPTIST, F., BOUASRIA, A., AUBERT, S., GEREMIA, R.A. & CHOLER, P. (2011).  
2588 Contrasting diversity patterns of crenarchaeal, bacterial and fungal soil communities in an alpine  
2589 landscape. *PLoS ONE* **6**, e19950.
- 2590 ZINGER, L., SHAHNAVAZ, B., BAPTIST, F., GEREMIA, R.A. & CHOLER, P. (2009). Microbial diversity in alpine  
2591 tundra soils correlates with snow cover dynamics. *The ISME Journal* **3**, 850–859.
- 2592 ZOLLINGER, B., ALEWELL, C., KNEISEL, C., MEUSBURGER, K., GÄRTNER, H., BRANDOVÁ, D., IVY-OCHS, S.,  
2593 SCHMIDT, M.W.I. & EGLI, M. (2013). Effect of permafrost on the formation of soil organic carbon pools  
2594 and their physical–chemical properties in the Eastern Swiss Alps. *CATENA* **110**, 70–85.
- 2595 ZUCCONI, L. & BUZZINI, P. (2021). Editorial: microbial communities of polar and alpine soils. *Frontiers in  
2596 Microbiology* **12**.
- 2597 VAN ZUIJLEN, K., ROOS, R.E., KLANDERUD, K., LANG, S.I. & ASPLUND, J. (2020). Mat-forming lichens affect  
2598 microclimate and litter decomposition by different mechanisms. *Fungal Ecology* **44**, 100905.
- 2599 ZUMSTEG, A., BÅÅTH, E., STIERLI, B., ZEYER, J. & FREY, B. (2013a). Bacterial and fungal community  
2600 responses to reciprocal soil transfer along a temperature and soil moisture gradient in a glacier forefield.  
2601 *Soil Biology and Biochemistry* **61**, 121–132.
- 2602 ZUMSTEG, A., LUSTER, J., GÖRANSSON, H., SMITTENBERG, R.H., BRUNNER, I., BERNASCONI, S.M., ZEYER,  
2603 J. & FREY, B. (2012). Bacterial, archaeal and fungal succession in the forefield of a receding glacier.  
2604 *Microbiological Ecology* **63**, 552–564.

2605 ZUMSTEG, A., SCHMUTZ, S. & FREY, B. (2013b). Identification of biomass utilizing bacteria in a carbon-  
2606 depleted glacier forefield soil by the use of  $^{13}\text{C}$  DNA stable isotope probing. *Environmental*  
2607 *Microbiology Reports* **5**, 424–437.

2608

2609

## 2610 **XI. SUPPORTING INFORMATION**

2611

2612 Additional supporting information may be found online in the Supporting Information section at the end  
2613 of the article.

2614 **Appendix S1:** Detailed description of the methodology and statistical analyses, accompanied by  
2615 additional tables and figures:

2616 **Table S1.** List of search strings used to assess the available literature in ‘Web of Science’ focusing  
2617 on alpine mountain soil biodiversity.

2618 **Table S2.** Main steps of the semi-quantitative literature analysis to assess the number of available  
2619 scientific papers focusing on alpine mountain soil biodiversity.

2620 **Table S3.** List of the alpine regions and the encompassing mountain ranges used for this review.

2621 **Table S4.** Number of scientific papers focusing primarily and secondarily on cryptogams in alpine  
2622 mountain soils.

2623 **Table S5.** Number of scientific papers focusing primarily and secondarily on microbiota (archaea,  
2624 bacteria, fungi, and protists) in alpine mountain soils.

2625 **Table S6.** Number of scientific papers focusing primarily and secondarily on fauna (macro-, meso-,  
2626 and microfauna) in alpine mountain soils.

2627 **Fig. S1.** Global map of scientific paper density per 1,000 km<sup>2</sup> on alpine soil biodiversity  
2628 (cryptogams, soil microbiota and soil fauna) by mountain region.

2629 **Fig. S2.** Comparison of the area of the eleven global alpine regions used in this review.

2630
